# Supplementary material
Source: Springer Nature journal article supplement (http://link.springer.com/content/esm/art:10.1186/2048-7010-3-18/file/MediaObjects/40066_2014_62_MOESM2_ESM.xlsx)
Supplement: MOESM2 [file 40066_2014_62_MOESM2_ESM.xlsx]

## Sheet: Sheet1
Journal articles downloaded from Scopus on 15th February 2014
The last column indicates the keywords related to production constraints and new challenges found in the analysis
Authors	Title	Year	Source title	Volume	Issue	Art. No.	Page start	Page end	Page count	Cited by	Link	Affiliations	Authors with affiliations	Abstract	Author Keywords	Index Keywords	Molecular Sequence Numbers	Chemicals/CAS	Tradenames	Manufacturers	Funding Details	References	Correspondence Address	Editors	Sponsors	Publisher	Conference name	Conference date	Conference location	Conference code	ISSN	ISBN	CODEN	DOI	PubMed ID	Language of Original Document	Abbreviated Source Title	Document Type	Source	Production constraint and new challenges found in keyword search
Satapathy S.S., Swain D.K., Herath S.	Field experiments and simulation to evaluate rice cultivar adaptation to elevated carbon dioxide and temperature in sub-tropical India	2014	European Journal of Agronomy	54			21	33			http://www.scopus.com/inward/record.url?eid=2-s2.0-84890399795&partnerID=40&md5=9b632c8819b0e74f8a8fb5bd3818548f	Agricultural and Food Engineering Department, Indian Institute of Technology Kharagpur, PO Box 721302, Kharagpur, India; Institute for Sustainability and Peace, United Nations University, 5-53-70 Jingumae, Shibuya-ku, Tokyo 150-8925, Japan	Satapathy, S.S., Agricultural and Food Engineering Department, Indian Institute of Technology Kharagpur, PO Box 721302, Kharagpur, India; Swain, D.K., Agricultural and Food Engineering Department, Indian Institute of Technology Kharagpur, PO Box 721302, K	Location specific adaptation option is required to minimize adverse impact of climate change on rice production. In the present investigation, we calibrated genotype coefficients of four cultivars in the CERES-Rice model for simulation of rice yield under	Calibration; CERES-Rice; Cultivar adaptation; Elevated CO2; Genotype coefficient; Rice yield	calibration; carbon dioxide; climate change; climate effect; crop yield; cultivar; field survey; genotype; local adaptation; rice; subtropical region; temperature effect; India						Aggarwal, P.K., Impact of climate change on Indian agriculture (2003) J. Plant Biol., 30, pp. 189-198; Ainsworth, E.A., Rice production in a changing climate: a meta-analysis of responses to elevated carbon dioxide and elevated ozone concentrations (2008)	Swain, D.K.; Agricultural and Food Engineering Department, Indian Institute of Technology Kharagpur, PO Box 721302, Kharagpur, India; email: swain@agfe.iitkgp.ernet.in								11610301		EJAGE	10.1016/j.eja.2013.11.010		English	Eur. J. Agron.	Article	Scopus	Climate
Hazra K.K., Chandra S.	Mild to prolonged stress increased rice tillering and source-to-sink nutrient translocation under SRI management	2014	Paddy and Water Environment	12	1		245	250			http://www.scopus.com/inward/record.url?eid=2-s2.0-84892431918&partnerID=40&md5=8c93335de09cc1a7366156880c5b6956	Crop Production Division, Indian Institute of Pulses Research, Kalyanpur, Kanpur, 208 024 Uttar Pradesh, India; Gobind Ballav Pant University of Agriculture and Technology, Pantnagar, 263145 Uttarakhand, India	Hazra, K.K., Crop Production Division, Indian Institute of Pulses Research, Kalyanpur, Kanpur, 208 024 Uttar Pradesh, India; Chandra, S., Gobind Ballav Pant University of Agriculture and Technology, Pantnagar, 263145 Uttarakhand, India	System of rice intensification (SRI) is a water-saving agro-technique being popularized in Southern Asia including India. A particular key practice in SRI, reduced water application (no continuous flooding), needs to be more farmer-friendly for its mass a	Nutrient translocation; Nutrient uptake; System of rice intensification; Water stress; Yield							Barker, R., Dawe, D., Tuong, T.P., Bhuiyan, S.I., Guerra, L.C., The outlook for water resources in the year 2020: challenges for research on water management in rice production (2000) Int Rice Comm Newslett, 49, pp. 7-21; Chaturvedi, G.S., Mishra, C.H., S	Hazra, K. K.; Crop Production Division, Indian Institute of Pulses Research, Kalyanpur, Kanpur, 208 024 Uttar Pradesh, India; email: kalikrishna123@gmail.com								16112490			10.1007/s10333-013-0361-7		English	Paddy Water Environ.	Article	Scopus	drought
Kumar M., Singh K.P., Srinivas K., Reddy K.S.	In-situ water conservation in upland paddy field to improve productivity in north-west Himalayan region of India	2014	Paddy and Water Environment	12	1		181	191			http://www.scopus.com/inward/record.url?eid=2-s2.0-84892443544&partnerID=40&md5=f336bb4f6200cc3669ced3ac6a69e537	Division of Resource Management, Central Research Institute for Dryland Agriculture, Hyderabad, 500059 AP, India; Agricultural Mechanization Division, Central Institute of Agricultural Engineering, Bhopal, 462 038 MP, India; National Academy for Agricultu	Kumar, M., Division of Resource Management, Central Research Institute for Dryland Agriculture, Hyderabad, 500059 AP, India; Singh, K.P., Agricultural Mechanization Division, Central Institute of Agricultural Engineering, Bhopal, 462 038 MP, India; Sriniv	The hill and mountain agro-ecosystem of NW Himalaya is primarily characterized by limited land under irrigation. Due to farming on terraces, large scale water resource development to store water for supplemental irrigation is not feasible in this region.	Hill and mountain agro-ecosystem; In situ water storage; Trench; Upland rice	Agro ecosystems; Economical evaluation; Field experimentation; Resource development; Soil moisture profiles; Supplemental irrigation; Upland rice; Water storage; Ecosystems; Irrigation; Productivity; Soil moisture; Trenching; Water conservation; Water man						Allen, R.G., Pareira, L.S., Raes, D., Smith, M., (1998) Crop evapotranspiration, guidelines for computing crop water requirements, , FAO irrigation and drainage paper 56. Food and Agriculture Organization of the United Nations, Rome, Italy; Ambast, S.K.,	Kumar, M.; Division of Resource Management, Central Research Institute for Dryland Agriculture, Hyderabad, 500059 AP, India; email: manovpkas@rediffmail.com								16112490			10.1007/s10333-013-0376-0		English	Paddy Water Environ.	Article	Scopus	Ecosystems
Song Z., Wang H., Strong P.J., Guo F.	Phytolith carbon sequestration in China's croplands	2014	European Journal of Agronomy	53			10	15			http://www.scopus.com/inward/record.url?eid=2-s2.0-84888802746&partnerID=40&md5=f8f04e0d847e372f364146425f6c9b42	School of Environment and Resources, Zhejiang Agricultural and Forestry University, Lin'an, Zhejiang 311300, China; Zhejiang Provincial Key Lab. of Carbon Cycling in Forest Ecosystems andCarbon Sequestration, Zhejiang Agricultural and Forestry University,	Song, Z., School of Environment and Resources, Zhejiang Agricultural and Forestry University, Lin'an, Zhejiang 311300, China, Zhejiang Provincial Key Lab. of Carbon Cycling in Forest Ecosystems andCarbon Sequestration, Zhejiang Agricultural and Forestry U	A relatively recent found persistent component of the carbon (C) sink is C occluded within plant phytoliths. We constructed a silica-phytolith content transfer function and used crop production data to explore the phytolith C sink within China's croplands	Carbon sink; China; Climate warming mitigation; Cropland ecosystem; Phytolith-occluded C (PhytOC)	agricultural land; agricultural management; carbon dioxide; carbon sequestration; carbon sink; climate change; crop production; fertilizer application; irrigation; maize; management practice; phytolith; rice; silica; transfer function; wheat; China; India					41103042, NSFC, National Natural Science Foundation of China	Blecker, S.W., McCulley, R.L., Chadwick, O.A., Kelly, E.F., Biologic cycling of silica across a grassland bioclimosequence (2006) Global Biogeochem. Cycles, 20, pp. 1-11; Ding, T.P., Zhou, J.X., Wan, D.F., Chen, Z.W., Wang, C.Y., Zhang, F., Silicon isotop	Song, Z.; School of Environment and Resources, Zhejiang Agricultural and Forestry University, 88 North Huancheng Road, Lin'an, Zhejiang 311300, China; email: songzhaoliang78@163.com								11610301		EJAGE	10.1016/j.eja.2013.11.004		English	Eur. J. Agron.	Article	Scopus	Fertilizer, climate, ecosystems
Saleh D., Milazzo J., Adreit H., Fournier E., Tharreau D.	South-East Asia is the center of origin, diversity and dispersion of the rice blast fungus, Magnaporthe oryzae	2014	New Phytologist	201	4		1440	1456		1	http://www.scopus.com/inward/record.url?eid=2-s2.0-84895066373&partnerID=40&md5=216de76089a194166a5964e562ff645f	CIRAD, UMR BGPI, TA A54/K, Montpellier, F 34398, France; INRA, UMR BGPI, TA A54/K, Montpellier, F 34398, France	Saleh, D., CIRAD, UMR BGPI, TA A54/K, Montpellier, F 34398, France, INRA, UMR BGPI, TA A54/K, Montpellier, F 34398, France; Milazzo, J., CIRAD, UMR BGPI, TA A54/K, Montpellier, F 34398, France; Adreit, H., CIRAD, UMR BGPI, TA A54/K, Montpellier, F 34398,	Inferring invasion routes and identifying reservoirs of diversity of plant pathogens are essential in proposing new strategies for their control. Magnaporthe oryzae, the fungus responsible for rice blast disease, has invaded all rice growing areas. Virule	Center of origin; Domestication; Magnaporthe; Migration; Population; Rice							Adreit, H., Santoso, Andriantsimialona, D., Utami, D.W., Nottéghem, J.L., Lebrun, M.H., Tharreau, D., Microsatellite markers for population studies of the rice blast fungus, Magnaporthe grisea (2007) Molecular Ecology Notes, 7, pp. 667-670; Agapow, P.M.,	Tharreau, D.; CIRAD, UMR BGPI, TA A54/K, Montpellier, F 34398, France; email: tharreau@cirad.fr								0028646X		NEPHA	10.1111/nph.12627		English	New Phytol.	Article	Scopus	LSP disease
Imam J., Alam S., Mandal N.P., Variar M., Shukla P.	Molecular screening for identification of blast resistance genes in North East and Eastern Indian rice germplasm (Oryza sativa L.) with PCR based makers	2014	Euphytica	196	2		199	211			http://www.scopus.com/inward/record.url?eid=2-s2.0-84893796570&partnerID=40&md5=0c637dec232899a0feed662468a2c4ed	Central Rainfed Upland Rice Research Station (CRRI), Hazaribagh, 825301 Jharkhand, India; Enzyme Technology and Protein Bioinformatics Laboratory, Department of Microbiology, Maharshi Dayanand University, Rohtak, 124001 Haryana, India	Imam, J., Central Rainfed Upland Rice Research Station (CRRI), Hazaribagh, 825301 Jharkhand, India, Enzyme Technology and Protein Bioinformatics Laboratory, Department of Microbiology, Maharshi Dayanand University, Rohtak, 124001 Haryana, India; Alam, S.,	Molecular screening and genetic diversity of major rice blast resistance (R) genes were determined in 32 accessions of rice germplasm from North East and Eastern India with ten gene based single nucleotide polymorphisms and sequence tagged sites (STS) mar	Blast resistance; Indian rice germplasm; Marker assisted selection; R genes screening; SNP markers	Oryza sativa; Oryza sativa (indica cultivar-group)					ICAR, Indian Council of Agricultural Research	Ashikawa, I., Hayashi, N., Yamane, H., Kanamori, H., Wu, J., Matsumoto, T., Ono, K., Yano, M., Two adjacent nucleotide-binding site-leucine-rich repeat class genes are required to confer Pikm-specific rice blast resistance (2008) Genetics, 180, pp. 2267-2	Shukla, P.; Enzyme Technology and Protein Bioinformatics Laboratory, Department of Microbiology, Maharshi Dayanand University, Rohtak, 124001 Haryana, India; email: pratyoosh.shukla@gmail.com								142336		EUPHA	10.1007/s10681-013-1024-x		English	Euphytica	Article	Scopus	LSP disease
Kuiry S.P., Mondal A., Banerjee S., Dutta S.	Morphological variability in Rhizoctonia solani isolates from different agro-ecological zones of West Bengal, India	2014	Archives of Phytopathology and Plant Protection	47	6		728	736			http://www.scopus.com/inward/record.url?eid=2-s2.0-84896698024&partnerID=40&md5=c439937340c87d0d30789fca35256bb9	Department of Plant Pathology, BCKV, Nadia, India; Department of Botany, University of Kalyani, Kalyani, India; Department of Biotechnology, Instrumentation and Environmental Science, BCKV, Nadia, India	Kuiry, S.P., Department of Plant Pathology, BCKV, Nadia, India; Mondal, A., Department of Plant Pathology, BCKV, Nadia, India, Department of Botany, University of Kalyani, Kalyani, India; Banerjee, S., Department of Biotechnology, Instrumentation and Envi	Sheath blight caused by Rhizoctonia solani Kühn is one of the most important diseases of rice, resulting in significant yield loss in rice every year. The rice-based intensified cropping system, edapho-climatological and host variations make the disease p	mycelial characters; Rhizoctonia solani; rice sheath blight disease; sclerotial variability	Brassica oleracea var. capitata; Citrullus colocynthis; Citrullus lanatus var. lanatus; Dolichos; Solanum tuberosum; Thanatephorus cucumeris; Trichosanthes dioica; Zea mays						Amin, Z.L., Elhassani, S., Majeed, M.A., Intra uterine methyl mercury poisoning in Iraq (1974) Pediatrics, 84, pp. 587-595; Baird, R.E., Carling, D.E., First report of Rhizoctonia solani AG-7 in Georgia (1997) Plant Dis, 81, p. 832; Biswas, A., Changing t	Dutta, S.; Department of Plant Pathology, BCKV, Nadia, India; email: subrata.dutta@bckv.edu.in								3235408			10.1080/03235408.2013.820388		English	Arch. Phytopathol. Plant Prot.	Article	Scopus	LSP disease
Mirhaj M., Razzak M.A., Wahab M.A.	Comparison of nitrogen balances and efficiencies in rice cum prawn vs. rice cum fish cultures in Mymensingh, North-Eastern Bangladesh	2014	Agricultural Systems	125			54	62			http://www.scopus.com/inward/record.url?eid=2-s2.0-84891900575&partnerID=40&md5=ec520a2d23fa77068e92812a7115ddc8	Institute of Animal Production in the Tropics and Subtropics, University of Hohenheim, Fruhwirtstrasse 12, 70599 Stuttgart, Germany; Department of Fisheries Management, Bangladesh Agricultural University, 2202 Mymensingh, Bangladesh	Mirhaj, M., Institute of Animal Production in the Tropics and Subtropics, University of Hohenheim, Fruhwirtstrasse 12, 70599 Stuttgart, Germany; Razzak, M.A., Department of Fisheries Management, Bangladesh Agricultural University, 2202 Mymensingh, Banglad	This on-site study is a comparison between integrated rice cum prawn and rice cum fish cultures and their efficiencies in North-Eastern Bangladesh. Common rice cultivation practices in this area often cause environmental problems due to inadequate use of	Comparison of integrated cultures; Cyprinus carpio; Macrobrachium rosenbergii; Nitrogen balance; Oreochromis niloticus	agricultural management; comparative study; cultivation; cyprinid; denitrification; economic analysis; environmental impact; eutrophication; fish culture; leaching; nitrogen; organic matter; pollution effect; prawn culture; protein; rice; runoff; soil fer					Be 1133/12-2, DFG, Deutsche Forschungsgemeinschaft	Alvarez, R., Steinbach, H.S., Asociacion entre el nitrogeno del suelo y el rendimiento de los cultivos (2010) Fertilidad de suelos. Characterizacion y manejo en la Region Pampeana, pp. 217-229. , Editorial FAUBA, Buenos Aires, R. Alvarez, G. Rubio, C.R. A	Mirhaj, M.; Institute of Animal Production in the Tropics and Subtropics, University of Hohenheim, Fruhwirtstrasse 12, 70599 Stuttgart, Germany; email: mmirhaj@uni-hohenheim.de								0308521X		AGSYD	10.1016/j.agsy.2013.12.004		English	Agric. Syst.	Article	Scopus	nitrogen
Awan M.I., Bastiaans L., van Oort P., Ahmad R., Ashraf M.Y., Meinke H.	Nitrogen use and crop performance of rice under aerobic conditions in a semiarid subtropical environment	2014	Agronomy Journal	106	1		199	211			http://www.scopus.com/inward/record.url?eid=2-s2.0-84891882697&partnerID=40&md5=23fab36b9dbafbb171fbca27f03aa14f	Centre for Crop Systems Analysis (CSA), Wageningen Univ, P.O. Box 430, 6700 AK Wageningen, Netherlands; Dep. of Crop Physiology, Univ. of Agriculture, Faisalabad 38040, Pakistan; Nuclear Institute for Agriculture and Biology (NIAB), P.O. Box 128 Jhang roa	Awan, M.I., Centre for Crop Systems Analysis (CSA), Wageningen Univ, P.O. Box 430, 6700 AK Wageningen, Netherlands, Dep. of Crop Physiology, Univ. of Agriculture, Faisalabad 38040, Pakistan; Bastiaans, L., Centre for Crop Systems Analysis (CSA), Wageninge	Aerobic rice (Oryza sativa L.) is gaining in popularity across South Asia, mainly because it saves water and labor. Under warm (sub) tropical conditions of this region, this unconventional system aimed at improved resource use efficiency is still in the d								Akhter, M., Ahmad, M., Ramzan, M., Awan, T.H., KSK 133: A high yielding, stiff stemmed and extra long grain coarse variety (2007) J. Anim. Plant Sci., 17, pp. 63-66; Akhter, J., Monneveux, P., Sabir, S.A., Ashraf, M.Y., Lateef, Z., Serraj, R., Selection o	Awan, M. I.; Centre for Crop Systems Analysis (CSA), Wageningen Univ, P.O. Box 430, 6700 AK Wageningen, Netherlands; email: masooduaf@yahoo.com								21962		AGJOA	10.2134/agronj2013.0262		English	Agron. J.	Article	Scopus	nitrogen
Dharmarathna W.R.S.S., Herath S., Weerakoon S.B.	Changing the planting date as a climate change adaptation strategy for rice production in Kurunegala district, Sri Lanka	2014	Sustainability Science	9	1		103	111			http://www.scopus.com/inward/record.url?eid=2-s2.0-84890887970&partnerID=40&md5=765e0b09026df12fdd1c5c2fbe4a3a4e	Department of Civil Engineering, University of Peradeniya, Peradeniya, Sri Lanka; Institute for Sustainability and Peace, United Nations University, Tokyo, Japan	Dharmarathna, W.R.S.S., Department of Civil Engineering, University of Peradeniya, Peradeniya, Sri Lanka; Herath, S., Institute for Sustainability and Peace, United Nations University, Tokyo, Japan; Weerakoon, S.B., Department of Civil Engineering, Univer	The effect of changing the planting date on the dry season rice yield was simulated by using the software Decision Support System for Agrotechnology Transfer (DSSAT 4.5) for four rice varieties grown in Kurunegala district, Sri Lanka under expected climat	Climate change adaptation; DSSAT; Planting date; Rice yield; SDSM							Aggarwal, P.K., Kumar, S.N., Pathak, H., Impacts of climate change on growth and yield of rice and wheat in the Upper Ganga Basin, WWF report (2010) Indian Agricultural Research Institute (IARI), India; Basak, J.K., (2009) Climate Change Impacts on Rice P	Dharmarathna, W. R. S. S.; Department of Civil Engineering, University of Peradeniya, Peradeniya, Sri Lanka; email: samaldharmarathna@gmail.com								18624065			10.1007/s11625-012-0192-2		English	Sustainability Sci.	Article	Scopus	Planting, climate
Islam M., Nath L.K., Patel D.P., Das A., Munda G.C., Samajdar T., Ngachan S.V.	Productivity and socio-economic impact of system of rice intensification and integrated crop management over conventional methods of rice establishment in eastern Himalayas, India	2014	Paddy and Water Environment	12	1		193	202			http://www.scopus.com/inward/record.url?eid=2-s2.0-84892427099&partnerID=40&md5=715cecb136f5ff0fdd9c99925add73cc	ICAR Research Complex for NEH Region, Umiam, Meghalaya, India	Islam, M., ICAR Research Complex for NEH Region, Umiam, Meghalaya, India; Nath, L.K., ICAR Research Complex for NEH Region, Umiam, Meghalaya, India; Patel, D.P., ICAR Research Complex for NEH Region, Umiam, Meghalaya, India; Das, A., ICAR Research Complex	To evaluate the performance of new rice establishment methods viz., system of rice intensification (SRI) and integrated crop management (ICM), a field study was conducted during 2008-11 in South Garo Hills, Meghalaya, foot hills of Eastern Himalayas, Indi	Integrated crop management; Paddies; Socio-economic impact; Sustainability; System of rice intensification; Water management						ICAR, Indian Council of Agricultural Research	(2008) Government of Meghalaya, Statistical Hand Book, , Anonymous, South Garo Hills, India; Balasubramanian, V., Sie, M., Hijmans, R.J., Otsuka, K., Increasing rice production Sub Saharan Africa: challenges and opportunities (2007) Adv Agron, 94, pp. 55-	Das, A.; ICAR Research Complex for NEH Region, Umiam, Meghalaya, India; email: anup_icar@yahoo.com								16112490			10.1007/s10333-013-0377-z		English	Paddy Water Environ.	Article	Scopus	Water, water management
Chauhan B.S., Abeysekera A.S.K., Wickramarathe M.S., Kulatunga S.D., Wickrama U.B.	Effect of rice establishment methods on weedy rice (Oryza sativa L.) infestation and grain yield of cultivated rice (O. sativa L.) in Sri Lanka	2014	Crop Protection	55			42	49			http://www.scopus.com/inward/record.url?eid=2-s2.0-84886857693&partnerID=40&md5=8460395e305f1a3e3c09e2224dd6a81b	International Rice Research Institute, Los Baños, Philippines; Rice Research and Development Institute, Batalagoda, Sri Lanka	Chauhan, B.S., International Rice Research Institute, Los Baños, Philippines; Abeysekera, A.S.K., Rice Research and Development Institute, Batalagoda, Sri Lanka; Wickramarathe, M.S., Rice Research and Development Institute, Batalagoda, Sri Lanka; Kulatung	Weedy rice is a great threat to rice production in Sri Lanka. Selective herbicides to manage weedy rice in conventional rice cultivars are not available in Sri Lanka. In the absence of appropriate chemical control measures, cultural approaches may help to	Clean seed; Farmers' practice; Row seeding; Seedling broadcast; Transplanted rice	crop yield; cultivation; farming system; rice; seasonal variation; seed production; weed; weed control; Sri Lanka						Abeysekara, A.S.K., Nugaliyadde, L., Herath, H.M.S., Wickrame, U.B., Iqbal, Y.B., Weedy rice: a threat to direct seeded rice culture in Sri Lanka (2010) Rice Congress 2010, Gannoruwa, Sri Lanka, , Rice Research and Development Institute, Department of Agr	Chauhan, B.S.; International Rice Research Institute, Los Baños, Philippines; email: b.chauhan@irri.org								2612194		CRPTD	10.1016/j.cropro.2013.09.008		English	Crop Prot.	Article	Scopus	weeds
Sathya A.	Are the Indian rice landraces a heritage of biodiversity to reminisce their past or to reinvent for future?	2013	Asian Agri-History	17	3		221	232			http://www.scopus.com/inward/record.url?eid=2-s2.0-84880858466&partnerID=40&md5=af9d69f42cfc26e1a8e48a42dd3bad86	Centre for Advanced Research in Environment (CARE), School of Civil Engineering, SASTRA University, Thanjavur 613402, Tamil Nadu, India	Sathya, A., Centre for Advanced Research in Environment (CARE), School of Civil Engineering, SASTRA University, Thanjavur 613402, Tamil Nadu, India	The accretion of data from various handwritten manuscripts, printed texts, holy Vedas, sacred books, relevant and significant literature have been coherently analyzed to give a trajectory overview on the ample ancient varietal choices of the significant c		agricultural history; biological characteristics; cultivar; cultural heritage; food security; historical record; medicinal plant; nutritive value; rice; sustainability; India						Uma, A., Ahuja, S.C., Thakrar, R., Singh, R.K., Rice - A nutraceutical (2008) Asian Agri-History, 12 (2), pp. 93-108; Arumugasamy, S., Jayashankar, N., Subramanian, K., Sridhar, S., Vijayalakshmi, K., (2001) Indigenous Rice Varieties-1, p. 74. , Centre fo	Sathya, A.; Centre for Advanced Research in Environment (CARE), School of Civil Engineering, SASTRA University, Thanjavur 613402, Tamil Nadu, India; email: sathyaalbert@gmail.com								9717730					English	Asian Agri-Hist.	Article	Scopus	Biodiversity, food security
Sujithra M., Chander S.	Simulation of rice brown planthopper, Nilaparvata lugens (Stal.) population and crop-pest interactions to assess climate change impact	2013	Climatic Change	121	2		331	347			http://www.scopus.com/inward/record.url?eid=2-s2.0-84887606122&partnerID=40&md5=4c9ee2b0cecc04938a578438703510ae	Division of Entomology, Indian Agricultural Research Institute, New Delhi, India	Sujithra, M., Division of Entomology, Indian Agricultural Research Institute, New Delhi, India; Chander, S., Division of Entomology, Indian Agricultural Research Institute, New Delhi, India	Brown planthopper (BPH), Nilaparvata lugens (Stal.) development studied at six constant temperatures, 19, 22, 25, 28, 31 and 33 ±1 °C on rice plants revealed that developmental period from egg hatching to adult longevity decreased from 46.8 to 18.4 days a		Adaptive capacity; Brown planthopper; Climate change impact; Constant temperature; Crop simulation model; Development rate; Indian subcontinents; Population decline; Animals; Carbon dioxide; Climate change; Climate models; Computer simulation; Crops; Popu						Aggarwal, P.K., Kalra, N., Chander, S., Pathak, H., InfoCrop: a dynamic simulation model for the assessment of crop yields, losses due to pests, and environmental impact of agro-ecosystems in tropical environments. I. Model description (2006) Agric Syst,	Sujithra, M.; Division of Entomology, Indian Agricultural Research Institute, New Delhi, India; email: sujithra@iari.res.in								1650009		CLCHD	10.1007/s10584-013-0878-1		English	Clim. Change	Article	Scopus	Climate
Mandal K.G., Majhi P., Sahoo D.K., Rout R., Kumar A., Ghosh S., Mohanty R.K., Raychaudhuri M.	Assessing the soil environment under major cropping systems in kuanria canal command	2013	Ecology, Environment and Conservation	19	2		509	513			http://www.scopus.com/inward/record.url?eid=2-s2.0-84882376372&partnerID=40&md5=4fdad5aa0d05e128c724cefea5a89cba	Diretorate of Water Management (ICAR), Bhubaneswar- 751 023, Odisha, India	Mandal, K.G., Diretorate of Water Management (ICAR), Bhubaneswar- 751 023, Odisha, India; Majhi, P., Diretorate of Water Management (ICAR), Bhubaneswar- 751 023, Odisha, India; Sahoo, D.K., Diretorate of Water Management (ICAR), Bhubaneswar- 751 023, Odis	Soil parameters viz. activities of soil enzymes, dehydrogenase, phosphatase and urease, soil organic carbon (SOC) content, SOC storage in the surface layer and in the profile were assessed in six different sites under three major cropping systems like ric	Rice-based cropping; Soil enzymes; Soil organic carbon	agricultural practice; ammonium; assessment method; canal; climate change; crop rotation; enzyme activity; fallow; rice; soil depth; soil organic matter; sugar cane; India; Odisha						Carlos, A., De, C.B., Luiz, P., De Oliveira, A.M.B., Roberto, S., De, L.T., Boas, D.V., De, A.C., Carbon and nitrogen stocks of an arenosol under irrigated fruit orchards in semiarid Brazil (2007) Scientia Agricola, 64 (2), pp. 169-175; Burns, R.G., Extra	Diretorate of Water Management (ICAR), Bhubaneswar- 751 023, Odisha, India								0971765X		EECOF			English	Ecol. Environ. Conserv.	Article	Scopus	Climate
Sarker M.A.R., Alam K., Gow J.	How does the variability in aus rice yield respond to climate variables in bangladesh?	2013	Journal of Agronomy and Crop Science	199	3		189	194		1	http://www.scopus.com/inward/record.url?eid=2-s2.0-84876436945&partnerID=40&md5=f670e5d4d7bd21f442af7d4d8e8a0af1	Faculty of Business and Law, School of Accounting, Economics and Finance, University of Southern Queensland, Toowoomba, QLD, Australia; Department of Economics, University of Rajshahi, Rajshahi, Bangladesh; Health Economics and HIV/AIDS Research Division	Sarker, M.A.R., Faculty of Business and Law, School of Accounting, Economics and Finance, University of Southern Queensland, Toowoomba, QLD, Australia, Department of Economics, University of Rajshahi, Rajshahi, Bangladesh; Alam, K., Faculty of Business an	In this study, the impacts of climate variables on the mean and variability in Aus variety rice yield in Bangladesh are assessed. Using the theoretical framework of the Just-Pope production function, cross-sectional time series data on Aus rice yield and	Aus rice yield; Bangladesh; Climate change	agricultural policy; climate variation; crop production; crop yield; data acquisition; environmental impact; rainfall; rice; theoretical study; time series; Bangladesh						Ahsan, S., Ali, M.S., Hoque, M.R., Osman, M.S., Rahman, M., Babar, M.J., Begum, A.S., Islam, K.R., Agricultural and environmental changes in Bangladesh in response to global warming (2011) Climate Change and Food Security in South Asia, pp. 119-134. , R.	Sarker, M.A.R.; Faculty of Business and Law, School of Accounting, Economics and Finance, University of Southern Queensland, Toowoomba, QLD 4350, Australia; email: md.abdurrashid.sarker@usq.edu.au								9312250		ZAPFA	10.1111/jac.12011		English	J. Agron. Crop. Sci.	Article	Scopus	Climate
Soora N.K., Aggarwal P.K., Saxena R., Rani S., Jain S., Chauhan N.	An assessment of regional vulnerability of rice to climate change in India	2013	Climatic Change	118	2014-03-04		683	699		1	http://www.scopus.com/inward/record.url?eid=2-s2.0-84878359433&partnerID=40&md5=484b529ff15ee212db401274e03102d5	Division of Environmental Sciences, Indian Agricultural Research Institute, PUSA, New Delhi, 110 012, India; CGIAR Programme on Climate Change and Food Security, International Water Management Institute, NASC Complex, New Delhi, 110012, India	Soora, N.K., Division of Environmental Sciences, Indian Agricultural Research Institute, PUSA, New Delhi, 110 012, India; Aggarwal, P.K., Division of Environmental Sciences, Indian Agricultural Research Institute, PUSA, New Delhi, 110 012, India, CGIAR Pr	A simulation analysis was carried out using the InfoCrop-rice model to quantify impacts and adaptation gains, as well as to identify vulnerable regions for irrigated and rain fed rice cultivation in future climates in India. Climates in A1b, A2, B1 and B2		Adaptation strategies; Adaptation to climate changes; Global climate model; Impacts and adaptation; Regional climate models; Simulation analysis; Spatial variations; Vulnerable regions; Climate change; Computer simulation; Crops; Rain; Climate models; ada						Aggarwal, P.K., Mall, R.K., Climate change and rice yields in diverse agro-environments of India. II. Effect of uncertainties in scenarios and crop models on impact assessment (2002) Clim Chang, 52, pp. 331-343; Aggarwal, P.K., Kropff, M.J., Cassman, K.G.	Soora, N. K.; Division of Environmental Sciences, Indian Agricultural Research Institute, PUSA, New Delhi, 110 012, India; email: nareshkumar.soora@gmail.com								1650009		CLCHD	10.1007/s10584-013-0698-3		English	Clim. Change	Article	Scopus	Climate
Singh S.S., Mukherjee J., Kumar S., Idris M.	Effect of elevated CO2 on growth and yield of rice crop in open top chamber in Sub humid climate of eastern India	2013	Journal of Agrometeorology	15	1		1	10			http://www.scopus.com/inward/record.url?eid=2-s2.0-84883527231&partnerID=40&md5=e4dfdfb5639aabd6cf8c7c2d4823dba5	ICAR Research Complex for Eastern Region, BV College, Patna 800014, India	Singh, S.S., ICAR Research Complex for Eastern Region, BV College, Patna 800014, India; Mukherjee, J., ICAR Research Complex for Eastern Region, BV College, Patna 800014, India; Kumar, S., ICAR Research Complex for Eastern Region, BV College, Patna 800014	This study was conducted during 2011 and 2012 at the experimental farm of ICAR Research Complex for Eastern Region, Patna, India in Open top chamber (OTC) as well as in open field condition. Four rice genotypes (Local/Indigenous: Rajshree, promising HYV o	Climate change and RUE; Elevated CO2; GHG; OTC; Rice							Alscher, R.G., Donahue, J.H., Cramer, C.L., Reactive oxygen species and antioxidants: Relationships in green cells (1997) PhysiolPlantarum., 100, pp. 224-233; Apel, K., Hirt, H., Reactive oxygen species: Metabolism, oxidative stress and signal transductio	ICAR Research Complex for Eastern Region, BV College, Patna 800014, India								9721665					English	J. Agrometeorol.	Article	Scopus	Climate
Ruane A.C., Major D.C., Yu W.H., Alam M., Hussain S.G., Khan A.S., Hassan A., Hossain B.M.T.A., Goldberg R., Horton R.M., Rosenzweig C.	Multi-factor impact analysis of agricultural production in Bangladesh with climate change	2013	Global Environmental Change	23	1		338	350		2	http://www.scopus.com/inward/record.url?eid=2-s2.0-84872608197&partnerID=40&md5=0fcf2aa274c6ed8f5196c721b3a1ceb5	NASA Goddard Institute for Space Studies, New York, NY, United States; Columbia University, Earth Institute Center for Climate Systems Research, New York, NY, United States; The World Bank, Washington, DC, United States; Bangladesh Centre for Advanced Stu	Ruane, A.C., NASA Goddard Institute for Space Studies, New York, NY, United States; Major, D.C., Columbia University, Earth Institute Center for Climate Systems Research, New York, NY, United States; Yu, W.H., The World Bank, Washington, DC, United States	Diverse vulnerabilities of Bangladesh's agricultural sector in 16 sub-regions are assessed using experiments designed to investigate climate impact factors in isolation and in combination. Climate information from a suite of global climate models (GCMs) i	Adaptation; Agriculture; Bangladesh; Climate change; Climate impacts; Crop modeling; DSSAT; Floods; Rice; Sea level rise; Wheat	carbon dioxide; climate change; climate effect; climate modeling; crop production; environmental impact assessment; flood; hydrological modeling; precipitation (climatology); rice; sea level; vulnerability; wheat; Bangladesh; Brahmaputra River; Ganges Riv						Adger, W.N., Agrawala, S., Mirza, M.M.Q., Conde, C., O'Brien, K., Pulhin, J., Pulwarty, R., Takahashi, K., (2007) Assessment of adaptation practices, options, constraints and capacity, pp. 717-743. , In: Parry, M.L., Canziani, O.F., Palutikof, J.P., van d	Ruane, A.C.; NASA Goddard Institute for Space Studies, 2880 Broadway, New York, NY 10025, United States; email: alexander.c.ruane@nasa.gov								9593780		GECHE	10.1016/j.gloenvcha.2012.09.001		English	Global Environ. Change	Article	Scopus	Climate
Subash N., Singh S.S., Priya N.	Observed variability and trends in extreme temperature indices and rice-wheat productivity over two districts of Bihar, India-a case study	2013	Theoretical and Applied Climatology	111	2014-01-02		235	250			http://www.scopus.com/inward/record.url?eid=2-s2.0-84871931457&partnerID=40&md5=b1ba4e14bfef2818caf50dc82a93cfeb	Project Directorate for Farming Systems Research, Indian Council of Agricultural Research, Modipuram, Meerut, 250 110 Uttar Pradesh, India; ICAR Research Complex for Eastern Region, ICAR Parisar, Bihar Veterinary College P.O., Patna, 800 014 Bihar, India	Subash, N., Project Directorate for Farming Systems Research, Indian Council of Agricultural Research, Modipuram, Meerut, 250 110 Uttar Pradesh, India; Singh, S.S., ICAR Research Complex for Eastern Region, ICAR Parisar, Bihar Veterinary College P.O., Pat	The purpose of this paper is to analyze the trends and variability in extreme temperature indices and its impact on rice-wheat productivity over two districts of Bihar, India, which is part of the middle Indo-Gangetic Basin. Mann-Kendall non-parametric te		climate change; climate effect; correlation; crop production; observational method; rice; spatial variation; temperature gradient; temporal variation; trend analysis; wheat; Bihar; India; Patna; Samastipur; Triticum aestivum						Aggarwal, P.K., Global climate change and Indian agriculture: impacts, adaptation and mitigation (2008) Indian J Agr Sci, 78 (11), pp. 911-919; Basak, J.K., Ali, M.A., Islam, M.N., Alam, M.J.B., Assessment of the effect of climate change on boro rice prod	Subash, N.; Project Directorate for Farming Systems Research, Indian Council of Agricultural Research, Modipuram, Meerut, 250 110 Uttar Pradesh, India; email: n_suby@rediffmail.com								0177798X			10.1007/s00704-012-0665-3		English	Theor. Appl. Climatol.	Article	Scopus	Climate
Barnwal P., Kotani K.	Climatic impacts across agricultural crop yield distributions: An application of quantile regression on rice crops in Andhra Pradesh, India	2013	Ecological Economics	87			95	109			http://www.scopus.com/inward/record.url?eid=2-s2.0-84872897427&partnerID=40&md5=dad443e0ca65ec7273e3c5de4489c4f7	International University of Japan, Japan; Columbia University, United States; Graduate School of International Relations, International University of Japan, 777 Kokusai-cho, Minami-Uonuma, Niigata 949-7277, Japan	Barnwal, P., International University of Japan, Japan, Columbia University, United States; Kotani, K., Graduate School of International Relations, International University of Japan, 777 Kokusai-cho, Minami-Uonuma, Niigata 949-7277, Japan	Climatic impact on agricultural production is a serious concern, as it is directly linked to food security and poverty. Whereas there are empirical studies that examine this issue with parametric approaches focusing on the "mean" level of variables, few s	Agriculture; Andhra Pradesh; Climate change; India; Quantile regression; Rice; Yield; Yield variability	adaptive management; agricultural production; agrometeorology; climate change; climate effect; crop yield; food security; poverty; regression analysis; rice; vulnerability; Andhra Pradesh; India						Aggarwal, P.K., Global climate change and Indian agriculture: impacts, adaptation and mitigation (2008) Indian Journal of Agricultural Sciences, 78 (11), pp. 911-919; Aggarwal, P., Mall, R., Climate change and rice yields in diverse agro-environments of I	Kotani, K.; Graduate School of International Relations, International University of Japan, 777 Kokusai-cho, Minami-Uonuma, Niigata 949-7277, Japan; email: kkotani@iuj.ac.jp								9218009		ECECE	10.1016/j.ecolecon.2012.11.024		English	Ecol. Econ.	Article	Scopus	Climate, food security
Bala B.K., Hossain M.A.	Modeling of Ecological Footprint and Climate Change Impacts on Food Security of the Hill Tracts of Chittagong in Bangladesh	2013	Environmental Modeling and Assessment	18	1		39	55			http://www.scopus.com/inward/record.url?eid=2-s2.0-84871930828&partnerID=40&md5=5e688f108a9cc203e9f8bd159048d793	Department of Farm Power and Machinery, Bangladesh Agricultural University, Mymensingh, 2202, Bangladesh; Bangladesh Agricultural Research Institute, Gazipur, Bangladesh	Bala, B.K., Department of Farm Power and Machinery, Bangladesh Agricultural University, Mymensingh, 2202, Bangladesh; Hossain, M.A., Bangladesh Agricultural Research Institute, Gazipur, Bangladesh	This paper presents an integrated and dynamic model for the management of the uplands of the Hill Tracts of Chittagong to predict food security and environmental loading for gradual transition of shifting agriculture land into horticulture crops and teak	Climate change impacts; Ecological footprint; Food security; Hill Tracts of Chittagong; Maize; Rice	Nicotiana tabacum; Tectona grandis; Zea mays						Aggarwal, P.K., Banerjee, B., Daryaei, M.G., Bhatia, A., Bala, A., Rani, S., InfoCrop: a dynamic simulation model for the assessment of crop yields, losses due to pests, and environmental impact of agro-ecosystems in tropical environments. II. Performance	Bala, B. K.; Department of Farm Power and Machinery, Bangladesh Agricultural University, Mymensingh, 2202, Bangladesh; email: bkbalabau@yahoo.com								14202026			10.1007/s10666-012-9326-2		English	Environ. Model. Assess.	Article	Scopus	Climate, food security
Mottaleb K.A., Mohanty S., Hoang H.T.K., Rejesus R.M.	The effects of natural disasters on farm household income and expenditures: A study on rice farmers in Bangladesh	2013	Agricultural Systems	121			43	52			http://www.scopus.com/inward/record.url?eid=2-s2.0-84883452669&partnerID=40&md5=82511710f44e39d3671875de048607c0	Social Sciences Division (SSD), International Rice Research Institute (IRRI), Los Baños, Philippines; Department of Agricultural and Applied Economics, University of Missouri-Columbia, United States; Department of Agricultural and Resource Economics, Nort	Mottaleb, K.A., Social Sciences Division (SSD), International Rice Research Institute (IRRI), Los Baños, Philippines; Mohanty, S., Social Sciences Division (SSD), International Rice Research Institute (IRRI), Los Baños, Philippines; Hoang, H.T.K., Departm	Although millions of households in the world depend on rice cultivation for income and employment, volatility in rice income and negative income shocks caused by crop failure stem from natural disasters, an almost regular phenomenon in rice farming in Asi	Cyclone; Difference-in-difference; Farm households; Human capital; Natural disaster; Natural experiment	agricultural practice; agricultural production; estimation method; household income; natural disaster; rice; social policy; Bangladesh						Adams, R.M., Hurd, B.H., Lenhart, S., Leary, N., Effects of global climate change on agriculture: an interpretative review (1998) Climate Res., 11, pp. 19-30. , www.int-res.com/articles/cr/11/c011p019.pdf, (accessed on 12.11.11); Bangladesh Bureau of Stat	Mottaleb, K.A.; Social Sciences Division (SSD), International Rice Research Institute (IRRI), Los Baños, Philippines; email: k.mottaleb@irri.org								0308521X		AGSYD	10.1016/j.agsy.2013.06.003		English	Agric. Syst.	Article	Scopus	Cyclone/typhoon
Rabbani G., Rahman A., Mainuddin K.	Salinity-induced loss and damage to farming households in coastal Bangladesh	2013	International Journal of Global Warming	5	4		400	415		1	http://www.scopus.com/inward/record.url?eid=2-s2.0-84892163059&partnerID=40&md5=74ece293b91887a71ac104f2695f173b	Bangladesh Centre for Advanced Studies, Gulshan-1, Dhaka-1212, Bangladesh	Rabbani, G., Bangladesh Centre for Advanced Studies, Gulshan-1, Dhaka-1212, Bangladesh; Rahman, A., Bangladesh Centre for Advanced Studies, Gulshan-1, Dhaka-1212, Bangladesh; Mainuddin, K., Bangladesh Centre for Advanced Studies, Gulshan-1, Dhaka-1212, Ba	Salinity intrusion in soil caused by climate-induced hazards, especially cyclones and sea level rise (SLR), is adversely affecting rice production in coastal Bangladesh. The southwest coastal district of Satkhira is one of the most vulnerable areas becaus	Adaptation; Agriculture; Bangladesh; Climate change; Coastal zone; Cyclone; Loss and damage; Rice production; Salinity intrusion; Sea level rise; SLR; South Asia							(2009) Yearbook of Agricultural Statistics of Bangladesh, , Bangladesh Bureau of Statistics, Statistics Division, Ministry of Planning, Government of Bangladesh; (2008) Yearbook of Agricultural Statistics of Satkhira, , Bangladesh Bureau of Statistics (BB	Rabbani, G.; Bangladesh Centre for Advanced Studies, Gulshan-1, Dhaka-1212, Bangladesh; email: golam.rabbani@bcas.net								17582083			10.1504/IJGW.2013.057284		English	Int. J. Global Warming	Article	Scopus	Cyclone/typhoon, climate
Paul B.G., Vogl C.R.	Organic shrimp aquaculture for sustainable household livelihoods in Bangladesh	2013	Ocean and Coastal Management	71			1	12		1	http://www.scopus.com/inward/record.url?eid=2-s2.0-84870163982&partnerID=40&md5=a5e84a98f1ebe8d357e93b9d6ed46acb	Division of Organic Farming, Department of Sustainable Agricultural Systems, BOKU-University of Natural Resources and Life Sciences, Gregor Mendel Strasse 33, A-1180 Vienna, Austria	Paul, B.G., Division of Organic Farming, Department of Sustainable Agricultural Systems, BOKU-University of Natural Resources and Life Sciences, Gregor Mendel Strasse 33, A-1180 Vienna, Austria; Vogl, C.R., Division of Organic Farming, Department of Susta	Black tiger shrimp (Penaeus monodon) cultivation in gher (modified rice fields or ponds located beside canals or rivers) is widespread in southwestern Bangladesh. Shrimp farming plays an important role in the economy of the country, as it earns foreign ex		Bangladesh; Conceptual frameworks; Economic growths; Employment opportunities; Focus groups; Foreign exchange; Natural phenomena; Penaeus monodon; Price fluctuation; Rice fields; Shrimp aquaculture; Shrimp farmers; Shrimp farming; Sustainable livelihood;						Ahmed, N., The sustainable livelihoods approach to the development of fish farming in rural Bangladesh (2009) Journal of International Farm Management, 4, pp. 1-18; Ahmed, N., Allison, E., Muir, J., Rice fields to prawn farms: a blue revolution in southwe	Paul, B.G.; Division of Organic Farming, Department of Sustainable Agricultural Systems, BOKU-University of Natural Resources and Life Sciences, Gregor Mendel Strasse 33, A-1180 Vienna, Austria; email: brojogopal@gmail.com								9645691		OCMAE	10.1016/j.ocecoaman.2012.10.007		English	Ocean Coast. Manage.	Article	Scopus	Cyclone/typhoon, sustainability, market
Akram H.M., Ali A., Sattar A., Rehman H.S.U., Bibi A.	Impact of water deficit stress on various physiological and agronomic traits of three Basmati rice (Oryza sativa L.) cultivars	2013	Journal of Animal and Plant Sciences	23	5		1415	1423			http://www.scopus.com/inward/record.url?eid=2-s2.0-84886900314&partnerID=40&md5=2a768fa0897b56c072b5f25c29ee3aab	Directorate of Agronomy, Ayub Agricultural Research Institute, Faisalabad, Pakistan; Department of Plant Breeding and Genetics, University Agriculture, Faisalabad, Pakistan	Akram, H.M., Directorate of Agronomy, Ayub Agricultural Research Institute, Faisalabad, Pakistan; Ali, A., Directorate of Agronomy, Ayub Agricultural Research Institute, Faisalabad, Pakistan; Sattar, A., Directorate of Agronomy, Ayub Agricultural Research	Scarcity of water for irrigation is an alarming issue limiting crop production worldwide and is becoming increasingly severe with the passage of time in Pakistan. Rice production in Pakistan is thus, being adversely hampered by the shortage of water. The	Agronomic parameters; Anthesis; Grain filling; Hill; Oryza sativa; Pakistan; Panicle; PAR; Photosynthetic rate; Physiological traits; Stomatal conductance; Transpiration rate; Water deficit; Water use efficiency; Yield components							Akram, H.M., (2007) Drought Tolerance of Wheat As Affected By Different Growth Substances Application At Various Growth Stages, , Ph. D. Thesis. Bot. Deptt. Punjab Uni, Lahore; (2001) Irrigational Water, pp. 20-25. , Anonymous, Economic Survey. 2000-01. G	Bibi, A.; Department of Plant Breeding and Genetics, University Agriculture, Faisalabad, Pakistan; email: ameerbibi@gmail.com								10187081					English	J. Anim. Plant Sci.	Article	Scopus	drought
Alauddin M., Sharma B.R.	Inter-district rice water productivity differences in Bangladesh: An empirical exploration and implications	2013	Ecological Economics	93			210	218			http://www.scopus.com/inward/record.url?eid=2-s2.0-84879571707&partnerID=40&md5=519a9422a896a85246c8e90aaaf1d085	School of Economics, The University of Queensland, Brisbane, Queensland 4072, Australia; International Water Management Institute (IWMI), New Delhi 110012, India	Alauddin, M., School of Economics, The University of Queensland, Brisbane, Queensland 4072, Australia; Sharma, B.R., International Water Management Institute (IWMI), New Delhi 110012, India	While the bulk of research on crop water productivity (WP) focuses on static cross-section analysis, this research provides a spatio-temporal perspective. It estimates rice crop WP for 21 Bangladesh districts for 37. years; explores WP variations among di	Agricultural intensification; Granger causality; Groundwater dependency; Policy transition; Spatio-temporal perspective; Technological diffusion; Water productivity	agricultural intensification; agricultural technology; cultivar; drought resistance; empirical analysis; Granger causality test; groundwater; irrigation system; policy analysis; productivity; rice; sustainability; tolerance; Bangladesh					DP0663809, ARC, Australian Research Council; ASEM2011/005, ACIAR, Australian Centre for International Agricultural Research	Ahmad, M.D., Masih, I., Turral, H., Diagnostic analysis of spatial and temporal variations in crop water productivity: a field scale analysis of the rice-wheat cropping system of Punjab, Pakistan (2004) Journal of Applied Irrigation Science, 39 (1), pp. 4	Alauddin, M.; School of Economics, The University of Queensland, Brisbane, Queensland 4072, Australia; email: m.alauddin@uq.edu.au								9218009		ECECE	10.1016/j.ecolecon.2013.05.015		English	Ecol. Econ.	Article	Scopus	drought
Torres R.O., McNally K.L., Cruz C.V., Serraj R., Henry A.	Screening of rice Genebank germplasm for yield and selection of new drought tolerance donors	2013	Field Crops Research	147			12	22			http://www.scopus.com/inward/record.url?eid=2-s2.0-84876737416&partnerID=40&md5=5b271f8547919f77bb75104640274f7a	International Rice Research Institute, Los Baños, Philippines	Torres, R.O., International Rice Research Institute, Los Baños, Philippines; McNally, K.L., International Rice Research Institute, Los Baños, Philippines; Cruz, C.V., International Rice Research Institute, Los Baños, Philippines; Serraj, R., International	Genebanks are stewards of the world's crop diversity, and represent large potential for sources of stress tolerance. In this study, selected accessions from the Genebank of the International Rice Research Institute (IRRI) were screened under upland and lo	Drought stress; Drought tolerance; Germplasm screening; Phenology	biomass; biotechnology; crop yield; cultivar; disease resistance; drought resistance; drought stress; germplasm; phenology; plant breeding; rice; tolerance; Bangladesh; India; Elaeocarpus bifidus						Bernier, J., Atlin, G.N., Serraj, R., Kumar, A., Spaner, D., Breeding upland rice for drought resistance (2008) J. Sci. Food Agric., 88, pp. 927-939; Bidinger, F.R., Mahalakshmi, V., Rao, G.D.P., Assessment of drought resistance in pearl millet [Pennisetu	Henry, A.; International Rice Research Institute, Los Baños, Philippines; email: a.henry@irri.org								3784290		FCRED	10.1016/j.fcr.2013.03.016		English	Field Crops Res.	Article	Scopus	drought
Yadaw R.B., Dixit S., Raman A., Mishra K.K., Vikram P., Swamy B.P.M., Cruz M.T.S., Maturan P.T., Pandey M., Kumar A.	A QTL for high grain yield under lowland drought in the background of popular rice variety Sabitri from Nepal	2013	Field Crops Research	144			281	287			http://www.scopus.com/inward/record.url?eid=2-s2.0-84874721902&partnerID=40&md5=c31554116c3e9c364870be931d175865	International Rice Research Institute (IRRI), DAPO Box 7777, Metro Manila, Philippines; Nepal Agricultural Research Council (NARC), Kathmandu, Nepal; Institute of Agriculture and Animal Science, Rampur, Chitawan, Nepal	Yadaw, R.B., International Rice Research Institute (IRRI), DAPO Box 7777, Metro Manila, Philippines, Nepal Agricultural Research Council (NARC), Kathmandu, Nepal, Institute of Agriculture and Animal Science, Rampur, Chitawan, Nepal; Dixit, S., Internation	Drought is the major cause of the yield reduction in rainfed rice areas. High GXE interaction in multi-location trials is a major challenge for breeders in developing breeding lines with a stable performance over diverse environments. In a BC1-derived map	Drought; MAS; QTL; Rice; Yield	chromosome; crop yield; drought stress; performance assessment; rainfed agriculture; rice; Nepal						Becker, H.C., Leon, J., Stability analysis in plant breeding (1988) Plant Breed., 101, pp. 1-23; Bernier, J., Kumar, A., Ramaiah, V., Spaner, D., Atlin, G., A large-effect QTL for grain yield under reproductive-stage drought stress in upland rice (2007) C	Kumar, A.; International Rice Research Institute (IRRI), DAPO Box 7777, Metro Manila, Philippines; email: a.kumar@irri.org								3784290		FCRED	10.1016/j.fcr.2013.01.019		English	Field Crops Res.	Article	Scopus	drought
Steele K.A., Price A.H., Witcombe J.R., Shrestha R., Singh B.N., Gibbons J.M., Virk D.S.	QTLs associated with root traits increase yield in upland rice when transferred through marker-assisted selection	2013	Theoretical and Applied Genetics	126	1		101	108		2	http://www.scopus.com/inward/record.url?eid=2-s2.0-84871922816&partnerID=40&md5=334d4f57a25cb271fe60b946c7b39054	Centre for Advanced Research in International Agricultural Development (CARIAD), Bangor University, Bangor, Gwynedd, LL57 2UW, United Kingdom; Institute of Biological and Environmental Sciences, Cruickshank Building, University of Aberdeen, Aberdeen, AB24	Steele, K.A., Centre for Advanced Research in International Agricultural Development (CARIAD), Bangor University, Bangor, Gwynedd, LL57 2UW, United Kingdom; Price, A.H., Institute of Biological and Environmental Sciences, Cruickshank Building, University	Altering root morphology of rice (Oryza sativa L.) cultivars could improve yields in drought-prone upland ecosystems. Marker-assisted backcross breeding was used to introgress four QTLs for root traits into an upland rice cultivar. The QTLs had previously		Controlled conditions; Eastern India; Experimental conditions; Field conditions; Genetic backgrounds; Introgressed; Marker-assisted selection; Multiple roots; Oryza sativa; QTL effects; Rice cultivars; Root morphology; Soil water availability; Agriculture		water, 7732-18-5; Genetic Markers; Soil; Water, 7732-18-5				Ashraf, M., Inducing drought tolerance in plants: recent advances (2010) Biotechnol Adv, 28, pp. 169-183; Bernier, J., Serraj, R., Kumar, A., Venuprasad, R., Impa, S., Gowda, V., Owane, R., Atlin, G., Increased water uptake explains the effect of qtl12.1	Steele, K. A.; Centre for Advanced Research in International Agricultural Development (CARIAD), Bangor University, Bangor, Gwynedd, LL57 2UW, United Kingdom; email: k.a.steele@bangor.ac.uk								405752		THAGA	10.1007/s00122-012-1963-y	22968512	English	Theor. Appl. Genet.	Article	Scopus	drought
Mishra K.K., Vikram P., Yadaw R.B., Swamy B.P.M., Dixit S., Cruz M.T.S., Maturan P., Marker S., Kumar A.	QDTY12.1: A locus with a consistent effect on grain yield under drought in rice	2013	BMC Genetics	14		12					http://www.scopus.com/inward/record.url?eid=2-s2.0-84874219697&partnerID=40&md5=d1591d067cbfd287cd2cd19701cfa52e	International Rice Research Institute (IRRI), DAPO Box 7777, Metro Manila, Philippines; Sam Higginbottom Institute of Agriculture, Technology and Sciences, Allahabad 211007UP, India; Nepal Agricultural Research Council (NARC), Kathmandu, Nepal	Mishra, K.K., International Rice Research Institute (IRRI), DAPO Box 7777, Metro Manila, Philippines, Sam Higginbottom Institute of Agriculture, Technology and Sciences, Allahabad 211007UP, India, Nepal Agricultural Research Council (NARC), Kathmandu, Nep	Background: Selection for grain yield under drought is an efficient criterion for improving the drought tolerance of rice. Recently, some drought-tolerant rice varieties have been developed using this selection criterion and successfully released for cult	Drought; Grain yield; QTL; Rice	allele; article; backcrossing; bulked segregant analysis; chromosome 12; crop improvement; drought tolerance; ecosystem; environmental factor; gene locus; gene mapping; genetic identification; genetic selection; genetic variability; grain yield; inbreedin						Pandey, S., Bhandari, H., Hardy, B., (2007) Economic Costs of Drought and Rice Farmers' Coping Mechanisms. A Cross-Country Comparative Analysis, pp. 1-9. , Los Baños, Philippines/Singapore: International Rice Research Institute/World Scientific Publishing	Kumar, A.; International Rice Research Institute (IRRI), DAPO Box 7777, Metro Manila, Philippines; email: a.kumar@irri.org								14712156		BGMED	10.1186/1471-2156-14-12	23442150	English	BMC Genet.	Article	Scopus	drought, ecosystems
Datta A., Yeluripati J.B., Nayak D.R., Mahata K.R., Santra S.C., Adhya T.K.	Seasonal variation of methane flux from coastal saline rice field with the application of different organic manures	2013	Atmospheric Environment	66			114	122		3	http://www.scopus.com/inward/record.url?eid=2-s2.0-84871094964&partnerID=40&md5=d967ced981b014edf47253661c10b8ab	School of Biological and Environmental Sciences, University of Aberdeen, United Kingdom; Crop Production Division, Central Rice Research Institute, Cuttack, India; Department of Environmental Science, University of Kalyani, Paschimbanga, India	Datta, A., School of Biological and Environmental Sciences, University of Aberdeen, United Kingdom, Crop Production Division, Central Rice Research Institute, Cuttack, India; Yeluripati, J.B., School of Biological and Environmental Sciences, University of	A field experiment was conducted in an irrigated saline rice field of Gadakujang (a fishing hamlet of coastal Odisha, India, ravaged by the super cyclone of 1999 and cyclone BOB02 of 2006), to study the effects of locally available organic and fresh green	Coastal rice paddy; Farmyard manure; Fresh green manure; Methane flux	Closed chambers; Coastal saline; Dry seasons; Farmyard manure; Field experiment; Flux measurements; Grain yield; Green manures; Methane fluxes; Morning glory; Organic manure; Rice fields; Rice grains; Rice paddy; Saline soil; Seasonal variation; Soil sali		methane, 74-82-8; sodium chloride, 7647-14-5				Achtnich, C., Bak, F., Conrad, R., Competition for electron donors among nitrate reducers, ferric iron reducers, sulphate reducers and methanogens in anoxic paddy soil (1995) Biol. Fert. Soil, 19, pp. 65-72; Alford, D.D., Delaune, R.D., Lindau, C.W., Meth	Datta, A.; School of Biological and Environmental Sciences, University of Aberdeen, 23 St. Machar Drive, Aberdeen AB24 3UU, United Kingdom; email: arindam.datta@fulbrightmail.org								13522310		AENVE	10.1016/j.atmosenv.2012.06.008		English	Atmos. Environ.	Article	Scopus	drought, ecosystems, nitrogen
Datta A., Santra S.C., Adhya T.K.	Effect of inorganic fertilizers (N, P, K) on methane emission from tropical rice field of India	2013	Atmospheric Environment	66			123	130		3	http://www.scopus.com/inward/record.url?eid=2-s2.0-84871069486&partnerID=40&md5=7ef2a3d042d3ab9989abce063a681dc2	School of Biological and Environmental Sciences, University of Aberdeen, United Kingdom; Crop Production Division, Central Rice Research Institute, Cuttack, Odisha, India; Department of Environmental Sciences, University of Kalyani, Paschimbanga, India	Datta, A., School of Biological and Environmental Sciences, University of Aberdeen, United Kingdom, Crop Production Division, Central Rice Research Institute, Cuttack, Odisha, India; Santra, S.C., Department of Environmental Sciences, University of Kalyan	In the tropical experimental rice field of Central Rice Research Institute, Odisha, India, an experiment was conducted during the dry season (January-April) and wet season (July-November) of rice cultivation to study the effect of nitrogen (N), phosphorus	Fertilizer management; Methane emission; Rice field; Seasonal variation	Bacterial population; Block designs; Dry seasons; Fertilizer applications; Fertilizer management; Grain yield; Inorganic fertilizers; Methane emissions; Microbial biomass carbon; Research institutes; Rice cultivation; Rice fields; Seasonal variation; Upsc		carbon, 7440-44-0; methane, 74-82-8; nitrogen, 7727-37-9; phosphorus, 7723-14-0; potassium, 7440-09-7				Adhya, T.K., Pattanaik, P., Satpathy, S.N., Kumarswamy, S., Sethunathan, N., Influence of phosphorus application on methane emission and production in flooded paddy soils (1998) Soil Biol. Biochem., 30 (2), pp. 177-181; Aulakh, M.S., Wassmann, R., Rennenb	Datta, A.; School of Biological and Environmental Sciences, University of Aberdeen, 23 St. Machar Drive, Aberdeen AB24 3UU, United Kingdom; email: arindam.datta@fulbrightmail.org								13522310		AENVE	10.1016/j.atmosenv.2012.09.001		English	Atmos. Environ.	Article	Scopus	drought, fertilizer, phosphorus, nitrogen
More R., Manjunath K.R.	Deducing Rice Crop Dynamics and Cultural Types of Bangladesh Using Geospatial Techniques	2013	Journal of the Indian Society of Remote Sensing	41	3		597	607			http://www.scopus.com/inward/record.url?eid=2-s2.0-84883775611&partnerID=40&md5=560c18dd0179d9a4a6478153bdcb87fb	Agro-Ecosystems Division, ABHG/EPSA, Space Applications Centre, Indian Space Research Organisation, Ahmedabad, 380015, India	More, R., Agro-Ecosystems Division, ABHG/EPSA, Space Applications Centre, Indian Space Research Organisation, Ahmedabad, 380015, India; Manjunath, K.R., Agro-Ecosystems Division, ABHG/EPSA, Space Applications Centre, Indian Space Research Organisation, Ah	Rice crop occupies an important aspect of food security and also contributes to global warming via GHGs emission. Characterizing rice crop using spatial technologies holds the key for addressing issues of global warming and food security as different rice	Crop calendar; Cropping pattern; Cultural types; Rice; SPOT VGT NDVI	crop; cropping practice; deep water; drought; food security; GIS; global warming; greenhouse effect; NDVI; remote sensing; rice; satellite data; vegetation dynamics; Bangladesh; South Asia						Badhawar, G.D., Hendersen, K.E., Application of Thematic Mapper data to corn and soybean development stage estimation (1985) Remote Sensing of Environment, 17, pp. 197-201; The statistical yearbook of Bangladesh (2005) Bangladesh Bureau of Statistics, , B	Manjunath, K. R.; Agro-Ecosystems Division, ABHG/EPSA, Space Applications Centre, Indian Space Research Organisation, Ahmedabad, 380015, India; email: krmanjunath@sac.isro.gov.in								0255660X			10.1007/s12524-012-0228-1		English	J. Ind. Soc. Remote Sens.	Article	Scopus	drought, food security
Uphoff N., Kassam A., Thakur A.	Challenges of increasing water saving and water productivity in the rice sector: Introduction to the system of rice intensification (SRI) and this issue	2013	Taiwan Water Conservancy	61	4		1	13			http://www.scopus.com/inward/record.url?eid=2-s2.0-84890946809&partnerID=40&md5=78b6d4e52476a2ab1bc6d0683be2b7c3	Cornell University, United States; University of Reading, United Kingdom; Directorate of Water Management, Bhubaneswar, India	Uphoff, N., Cornell University, United States; Kassam, A., University of Reading, United Kingdom; Thakur, A., Directorate of Water Management, Bhubaneswar, India	For the past dozen years, what is known as the System of Rice Intensification (SRI) has been controversial in some circles at the same time that its demonstrations, acceptance, and adaptations have spread to many countries, now over 50. Researchers, most	Greenhouse gas emissions; Irrigation water productivity; Irrigation water saving; System of Rice Intensification; Water use efficiency	Agricultural productions; Conservation agricultures; Irrigation water savings; Irrigation waters; Management and conservations; Principles and practices; System of rice intensifications; Water use efficiency; Gas emissions; Global warming; Greenhouse gase						Araya, H., Edwards, S., Asmelash, A., Legasse, H., Zibelo, G.H., Assefa, T., Mohammed, E., Misgina, S., SCI: Planting with space, (2013) Farming Matters, 29, pp. 34-37; Behera, D., Chaudhury, A.K., Vutukutu, V.K., Gupta, A., Machiraju, S., Shah, P., Enhan	Uphoff, N.; Cornell UniversityUnited States; email: ntu1@cornell.edu								4921505					English	Taiwan Water Conservancy	Article	Scopus	drought, water, water management
Soundharajan B., Sudheer K.P.	Sensitivity analysis and auto-calibration of ORYZA2000 using simulation-optimization framework	2013	Paddy and Water Environment	11	2014-01-04		59	71			http://www.scopus.com/inward/record.url?eid=2-s2.0-84871719384&partnerID=40&md5=560ad11738932fcc80240764c05450c7	Indian Institute of Technology Madras, Chennai, 600036, India	Soundharajan, B., Indian Institute of Technology Madras, Chennai, 600036, India; Sudheer, K.P., Indian Institute of Technology Madras, Chennai, 600036, India	There has been an increasing interest to employ crop growth simulation models for taking decision on irrigation water management. The effectiveness of such decisions mainly lies on the efficiency of the model in simulating the crop growth and the yield, w	Crop growth model; Genetic algorithm; ORYZA2000; Parameter estimation; Rice crop	Auto calibration; Crop growth; Crop growth model; Deficit irrigation; Field experiment; Irrigation water management; Objective functions; Optimizers; ORYZA2000; Rice crops; Simulation optimization; South India; Validation data; Water stress; Computer simu						Arora, V.K., Application of a rice growth and water balance model in an irrigated semi-arid subtropical environment (2006) Agric Water Manag, 83, pp. 51-57; Belder, P., Bouman, B.A.M., Cabangon, R., Guoan, L., Quilang, E.J.P., Li, Y., Spiertz, J.H.J., Tuo	Sudheer, K. P.; Indian Institute of Technology Madras, Chennai, 600036, India; email: sudheer@iitm.ac.in								16112490			10.1007/s10333-011-0293-z		English	Paddy Water Environ.	Article	Scopus	drought, water, water management
Singh A.K.	Probable agricultural biodiversity heritage sites in India. XVIII. The Cauvery region	2013	Asian Agri-History	17	4		353	376			http://www.scopus.com/inward/record.url?eid=2-s2.0-84890087584&partnerID=40&md5=a8a956ad7a060ff53a0a92c8c132ab6d	H.No. 2924, Sector-23, Gurgaon 122017, Haryana, India	Singh, A.K., H.No. 2924, Sector-23, Gurgaon 122017, Haryana, India	The region drained by the Cauvery (Kaveri) river, particularly the delta area, falling in the state of Tamil Nadu, is an agriculturally important region where agriculture has been practiced from ancient times involving the majority of the local tribes and		biodiversity; drought resistance; flood control; heritage conservation; rice; water management; Cauvery River; India						Arora, R.K., Nayar, E.R., Wild relatives of crop plants of India (1984) National Bureau of Plant Genetic Resources (NBPGR), p. 88. , New Delhi, India; Babu, C., Senthilraja, K., Banu Lekha, C., Kokilavani, S., Anbhazhagan, R., Gurusamy, L., Sekhar, N.U.,	Singh, A.K.H.No. 2924, Sector-23, Gurgaon 122017, Haryana, India; email: anurudhksingh@gmail.com								9717730					English	Asian Agri-Hist.	Article	Scopus	drought, water, water management, biodiversity
Bolan N.S., Makino T., Kunhikrishnan A., Kim P.-J., Ishikawa S., Murakami M., Naidu R., Kirkham M.B.	Cadmium Contamination and Its Risk Management in Rice Ecosystems	2013	Advances in Agronomy	119			183	273			http://www.scopus.com/inward/record.url?eid=2-s2.0-84872126041&partnerID=40&md5=3ed9602dd83343f1eeebc0bddfcd1bc6	Centre for Environmental Risk Assessment and Remediation, University of South Australia, Mawson Lakes, Australia; Cooperative Research Centre for Contamination Assessment, Remediation of the Environment, Adelaide, Australia; Soil Environmental Division, N	Bolan, N.S., Centre for Environmental Risk Assessment and Remediation, University of South Australia, Mawson Lakes, Australia, Cooperative Research Centre for Contamination Assessment, Remediation of the Environment, Adelaide, Australia; Makino, T., Soil	Cadmium (Cd) has been identified as one of the major heavy metals reaching the food chain through various geogenic and anthropogenic activities. In many East and South Asian countries including Japan, Bangladesh, Indonesia, and Korea, Cd accumulation in r	Biosolids; Cadmium; Immobilization; Itai-itai disease; Paddy; Phosphate fertilizers; Phytoremediation; Population critical concentration; Rice; Soil washing							Abumaizar, R.J., Smith, E.H., Heavy metal contaminants removal by soil washing (1999) J. Hazard. Mater., 70, pp. 71-86; Adriano, D.C., (1986) Trace Elements in the Terrestrial Environment, , Springer-Verlag, New York; Adriano, D.C., (2001) Trace Elements																		Ecosystems
Xia L., Robock A.	Impacts of a nuclear war in South Asia on rice production in Mainland China	2013	Climatic Change	116	2		357	372		2	http://www.scopus.com/inward/record.url?eid=2-s2.0-84871442907&partnerID=40&md5=fa88c071a7a6999e5b8107aa0a9b6f51	Department of Environmental Sciences, Rutgers University, 14 College Farm Road, NB, NJ, 08901, United States	Xia, L., Department of Environmental Sciences, Rutgers University, 14 College Farm Road, NB, NJ, 08901, United States; Robock, A., Department of Environmental Sciences, Rutgers University, 14 College Farm Road, NB, NJ, 08901, United States	A regional nuclear war between India and Pakistan with a 5 Tg black carbon injection into the upper troposphere would produce significant climate changes for a decade, including cooling, reduction of solar radiation, and reduction of precipitation, which		Agricultural productivity; Agrotechnology transfer; Black carbon; Climate anomalies; Climate record; East coast; Eastern China; Management practices; Northern China; Pakistan; Rice production; Rice yield; Simulation model; South Asia; Upper troposphere; W						Adams, R.M., Rosenzweig, C., Peart, R.M., Ritchie, J.T., McCarl, B.A., Glyer, J.D., Curry, R.B., Allen Jr., L.H., Global climate change and US agriculture (1990) Nature, 345, pp. 219-224. , doi: 10. 1038/345219a0; Batjes, N.H., (2008) ISRIC-WISE harmonize	Xia, L.; Department of Environmental Sciences, Rutgers University, 14 College Farm Road, NB, NJ, 08901, United States; email: lxia@envsci.rutgers.edu								1650009		CLCHD	10.1007/s10584-012-0475-8		English	Clim. Change	Article	Scopus	Fertilizer, climate
Brar B.S., Singh K., Dheri G.S., Balwinder-Kumar	Carbon sequestration and soil carbon pools in a rice-wheat cropping system: Effect of long-term use of inorganic fertilizers and organic manure	2013	Soil and Tillage Research	128			30	36		1	http://www.scopus.com/inward/record.url?eid=2-s2.0-84875088152&partnerID=40&md5=b8cf7d9d36e4ced1dff6f1c99fe0df11	Department of Soil Science, Punjab Agricultural University, Ludhiana 141004, India	Brar, B.S., Department of Soil Science, Punjab Agricultural University, Ludhiana 141004, India; Singh, K., Department of Soil Science, Punjab Agricultural University, Ludhiana 141004, India; Dheri, G.S., Department of Soil Science, Punjab Agricultural Uni	Agricultural soil is a potential sink for atmospheric carbon as soil organic carbon. The carbon sequestration is affected by cropping system and management practices adopted. Rice-wheat is a dominant cropping system in the Indo-Gangetic plains. Previous s	Carbon sequestration; Farmyard manure; Fertilizers; Rice-wheat cropping system; Soil carbon pools	Carbon sequestration; Farmyard manure; Rice-wheat cropping systems; Soil carbon pool; Soil organic carbon content; Soil organic carbon pools; Water-soluble carbohydrates; Wheat (Triticum aestivum L.); Agriculture; Carbon; Fertilizers; Lakes; Manures; Plan						Agbede, T.M., Ojeniyi, S.O., Adeyemo, A.J., Effect of poultry manure on soil physical and chemical properties, growth and grain yield of sorghum in southwest, Nigeria (2008) Eurasian Journal of Sustainable Agriculture, 2, pp. 72-77; Babhulkar, P.S., Wandi	Brar, B.S.; Department of Soil Science, Punjab Agricultural University, Ludhiana 141004, India; email: bsbrar1957@yahoo.co.in								1671987		SOTRD	10.1016/j.still.2012.10.001		English	Soil Tillage Res.	Article	Scopus	Fertilizer, water, water management
Mandal K.G., Kundu D.K., Thakur A.K., Kannan K., Brahmanand P.S., Kumar A.	Aerobic rice response to irrigation regimes and fertilizer nitrogen rates	2013	Journal of Food, Agriculture and Environment	11	2014-03-04		1148	1153			http://www.scopus.com/inward/record.url?eid=2-s2.0-84887571108&partnerID=40&md5=8e6ab3ec9405839d63b027cc526a497c	Opp. Rail Vihar, Chandrasekharpur, Bhubaneswar-751 023, Odisha, India; Central Research Institute for Jute and Allied Fibres (ICAR), Barrackpore- 700120, Kolkata, India; Central Soil and Water Conservation Research and Training Institute (ICAR), Ooty- 643	Mandal, K.G., Opp. Rail Vihar, Chandrasekharpur, Bhubaneswar-751 023, Odisha, India; Kundu, D.K., Central Research Institute for Jute and Allied Fibres (ICAR), Barrackpore- 700120, Kolkata, India; Thakur, A.K., Opp. Rail Vihar, Chandrasekharpur, Bhubanesw	Rice production in aerobic conditions holds promise in Asia especially in the era of increasing irrigation water scarcity. Field experiments were conduceted on aerobic rice systems at the research farm of the Directorate of Water Management (ICAR), Bhuban	Aerobic rice; Irrigation regimes; Nitrogen rates; Variety; Water saving	nitrogen fertilizer; rain; water; air temperature; article; biomass production; climate; crop management; crop production; grain yield; harvest; irrigation (agriculture); nonhuman; physiological process; plant growth; rice; seedling; soil analysis; soil m		water, 7732-18-5				Viraktamath, B.C., Ilyas Ahmed, M., Singh, A.K., Hybrid rice for sustainable food security (2006) Indian Farming, Special Issue on 2nd International Rice Congress, pp. 25-30; Mandal, D.K., Mandal, C., Raja, P., Goswami, S.N., Identification of suitable ar									14590255					English	J. Food Agric. Environ.	Article	Scopus	Fertilizer, water, water management, nitrogen
Fulda B., Voegelin A., Kretzschmar R.	Redox-controlled changes in cadmium solubility and solid-phase speciation in a paddy soil as affected by reducible sulfate and copper	2013	Environmental Science and Technology	47	22		12775	12783			http://www.scopus.com/inward/record.url?eid=2-s2.0-84888252238&partnerID=40&md5=06f15a79edda1fb20035aeb35f7f4dcb	Institute of Biogeochemistry and Pollutant Dynamics, ETH Zurich, CHN, CH-8092 Zurich, Switzerland; Eawag, Swiss Federal Institute of Aquatic Science and Technology, CH-8600 Duebendorf, Switzerland	Fulda, B., Institute of Biogeochemistry and Pollutant Dynamics, ETH Zurich, CHN, CH-8092 Zurich, Switzerland; Voegelin, A., Eawag, Swiss Federal Institute of Aquatic Science and Technology, CH-8600 Duebendorf, Switzerland; Kretzschmar, R., Institute of Bi	The solubility of Cd in contaminated paddy soils controls Cd uptake by rice, which is an important food safety issue. We investigated the solution and solid-phase dynamics of Cd in a paddy soil spiked with ∼20 mg kg -1 Cd during 40 days of soil reduction		Cadmium solubility; Microbial reduction; Paddy soil As; Soil flooding; Soil reduction; Solid-phase speciation; Sulfate content; Sulfate reduction; Floods; Soils; Solubility; Sulfur compounds; X ray absorption spectroscopy; Cadmium; cadmium; copper; sulfat		cadmium, 22537-48-0, 7440-43-9; copper, 15158-11-9, 7440-50-8; sulfate, 14808-79-8			200021-117933, SNSF, Swiss National Science Foundation; 200020-135338, SNSF, Swiss National Science Foundation	Chen, Z.S., Cadmium and lead contamination of soils near plastic stabilizing materials producing plants in northern Taiwan (1991) Water, Air, Soil Pollut., 578, pp. 745-754; Lee, S., Geochemistry and partitioning of trace metals in paddy soils affected by	Voegelin, A.; Eawag, Swiss Federal Institute of Aquatic Science and Technology, CH-8600 Duebendorf, Switzerland; email: andreas.voegelin@eawag.ch								0013936X		ESTHA	10.1021/es401997d		English	Environ. Sci. Technol.	Article	Scopus	Flooding
Zhao F.-J., Harris E., Yan J., Ma J., Wu L., Liu W., McGrath S.P., Zhou J., Zhu Y.-G.	Arsenic methylation in soils and its relationship with microbial arsM abundance and diversity, and As speciation in rice	2013	Environmental Science and Technology	47	13		7147	7154			http://www.scopus.com/inward/record.url?eid=2-s2.0-84880110178&partnerID=40&md5=9fee46e0f1b569e5b6c947ab9d64e6a7	Jiangsu Collaborative Innovation Center for Solid Organic Waste Resource Utilization, College of Resources and Environmental Sciences, Nanjing Agricultural University, Nanjing 210095, China; Sustainable Soil and Grassland Systems Department, Rothamsted Re	Zhao, F.-J., Jiangsu Collaborative Innovation Center for Solid Organic Waste Resource Utilization, College of Resources and Environmental Sciences, Nanjing Agricultural University, Nanjing 210095, China, Sustainable Soil and Grassland Systems Department,	Methylation of arsenic in soil influences its environmental behavior and accumulation by plants, but little is known about the factors affecting As methylation. As speciation was determined in the pore waters of six soils from diverse geographical locatio		Dimethylarsinic acids; Environmental behavior; Flooded conditions; Geographical locations; Methyltransferases; Monomethylarsonic acids; Soil conditions; Uncontaminated soils; Alkylation; Arsenic; Groundwater; Groundwater pollution; Methylation; Soils; Soi		arsenic, 7440-38-2; cacodylic acid, 124-65-2, 75-60-5; methanearsonic acid, 124-58-3				Meharg, A.A., Zhao, F.J., (2012) Arsenic & Rice, p. 171. , Springer: Dordrecht; Xu, X.Y., McGrath, S.P., Meharg, A., Zhao, F.J., Growing rice aerobically markedly decreases arsenic accumulation (2008) Environ. Sci. Technol., 42, pp. 5574-5579; Arao, T., K	Zhao, F.-J.; Jiangsu Collaborative Innovation Center for Solid Organic Waste Resource Utilization, College of Resources and Environmental Sciences, Nanjing Agricultural University, Nanjing 210095, China; email: Fangjie.Zhao@njau.edu.cn								0013936X		ESTHA	10.1021/es304977m		English	Environ. Sci. Technol.	Article	Scopus	Flooding
Dey M.M., Spielman D.J., Haque A.B.M.M., Rahman M.S., Valmonte-Santos R.	Change and diversity in smallholder rice-fish systems: Recent evidence and policy lessons from Bangladesh	2013	Food Policy	43			108				http://www.scopus.com/inward/record.url?eid=2-s2.0-84884366410&partnerID=40&md5=6bfa135557e228ae8572b6c80275ff73	Department of Aquaculture and Fisheries, University of Arkansas at Pine Bluff, United States; Environment and Production Technology Division, International Food Policy Research Institute, 2033 K St. NW, Washington, DC 20006, United States; Wageningen Univ	Dey, M.M., Department of Aquaculture and Fisheries, University of Arkansas at Pine Bluff, United States; Spielman, D.J., Environment and Production Technology Division, International Food Policy Research Institute, 2033 K St. NW, Washington, DC 20006, Uni	Efforts to unlock the genetic potential of both rice and fish, when combined with improvements in the management of rice-fish systems, can potentially increase agricultural productivity and food security in some of the poorest and most populous countries	Bangladesh; Food; Income; Productivity; Rice-fish systems	agricultural production; fish; food policy; food security; income distribution; policy making; productivity; rice; smallholder; Bangladesh						(2005), ADB (Asian Development Bank). An Evaluation of Small-Scale Freshwater Rural Aquaculture Development for Poverty Reduction, Manila, PhilippinesAhmed, N., Garnett, S.T., Sustainability of freshwater prawn farming in rice fields in southwest Banglade	Dey, M.M.; Department of Aquaculture and Fisheries, University of Arkansas at Pine BluffUnited States; email: mdey@uaex.edu								3069192			10.1016/j.foodpol.2013.08.011		English	Food Policy	Article	Scopus	Food Security
Anik A.R., Manjunatha A.V., Bauer S.	Impact of farm level corruption on the food security of households in Bangladesh	2013	Food Security	5	4		565	574			http://www.scopus.com/inward/record.url?eid=2-s2.0-84889028924&partnerID=40&md5=a0d4b83a3a948d83b00ff33cf4e019f7	Department of Agricultural Economics, Bangabandhu Sheikh Mujibur Rahman Agricultural University (BSMRAU), Salna, Gazipur, 1706, Bangladesh; Agricultural Development and Rural Transformation Centre, Institute for Social and Economic Change, Bangalore, 5600	Anik, A.R., Department of Agricultural Economics, Bangabandhu Sheikh Mujibur Rahman Agricultural University (BSMRAU), Salna, Gazipur, 1706, Bangladesh; Manjunatha, A.V., Agricultural Development and Rural Transformation Centre, Institute for Social and Ec	In this article, we have analyzed the impact of farm level corruption on households' food security using survey data collected from 210 Bangladeshi rice farmers. Econometric results confirm that the cost of corruption adversely affects households' calorie	Bangladesh; Calorie intake determinants; Farm level corruption impacts; Food security; Rice farmers	corruption; education; farming system; food consumption; food security; household expenditure; household survey; paddy farming; rice; Bangladesh					German Academic Exchange Service	Abdulai, A., Aubert, D., Nonparametric and parametric analysis of calorie consumption in Tanzania (2004) Food Policy, 29 (2), pp. 113-129; Aguiar, M., Hurst, E., (2003) Consumption Vs. Expenditure, , University of Chicago: Working Paper; Akramov, K.T., Yu	Anik, A. R.; Department of Agricultural Economics, Bangabandhu Sheikh Mujibur Rahman Agricultural University (BSMRAU), Salna, Gazipur, 1706, Bangladesh; email: anikbd1979@gmail.com								18764517			10.1007/s12571-013-0282-8		English	Food Secur.	Article	Scopus	Food Security
Saha M.	The state, scientists, and staple crops: Agricultural " modernization" in pre-green revolution India	2013	Agricultural History	87	2		201	223			http://www.scopus.com/inward/record.url?eid=2-s2.0-84880856158&partnerID=40&md5=0fce3d46735401797354893fb1c77e8b	South Asian History, Appalachian State University, United States	Saha, M., South Asian History, Appalachian State University, United States	This article explores the history of agricultural research in independent India in the context of Cold War politics, highlighting recurrent food crises and the drive for national modernization. It looks at the research conducted on rice and wheat at two o		agricultural development; agricultural research; Cold War; crop; food security; green revolution; modernization; politics; rice; wheat; India						Nehru, J., (1946) The Discovery of India, , New York: John Day chpt. 1; (1952) First Five Year Plan, , Planning Commission New Delhi: Planning Commission of India chpt. 11; Chandra, B., (1966) The Rise and Growth of Economic Nationalism in India: Economic	Saha, M.; South Asian History, Appalachian State UniversityUnited States								21482			10.3098/ah.2013.87.2.201		English	Agric. Hist.	Article	Scopus	Food Security
Karmokar P.K., Shitan M., Rabiul Alam Beg A.B.M.	Long-run relationship of the HYV Boro rice yields in the northern region of Bangladesh	2013	Journal of Food, Agriculture and Environment	11	1		441	444			http://www.scopus.com/inward/record.url?eid=2-s2.0-84874535943&partnerID=40&md5=bdc05ce8ad5e286efa803bb99546ac50	Laboratory of Computational Statistics and Operations Research, Institute for Mathematical Research, Universiti Putra Malaysia, 43400 UPM Serdang, Selangor, Malaysia; Department of Mathematics, Faculty of Science, Universiti Putra Malaysia, 43400 UPM Serd	Karmokar, P.K., Laboratory of Computational Statistics and Operations Research, Institute for Mathematical Research, Universiti Putra Malaysia, 43400 UPM Serdang, Selangor, Malaysia, Department of Statistics, University of Rajshahi, Rajshahi-6205, Banglad	Bangladesh is a large agrarian country and the people of Bangladesh mainly depend on rice for their food and calories intake. High Yielding Variety (HYV) Boro rice constitutes a large share in the domestic food grain of the country. HYV Boro rice is culti	Error correction; Granger causality; Long-run relation; Multicointegration; Speed of adjustment	article; Bangladesh; caloric intake; equilibrium constant; food; food security; hyv boro rice; nonhuman; policy; rice; species cultivation; statistical model						Alam, M.S., Islam, M.R., Jabber, M.A., Islam, M.S., Salam, M.A., Institutional backup towards food security in Bangladesh (2008) Proceedings BKAS 13thNational Conference and Seminar on Climate Changes: Food Security in Bangladesh, p. 13; (2010) Bangladesh	Karmokar, P. K.; Laboratory of Computational Statistics and Operations Research, Institute for Mathematical Research, Universiti Putra Malaysia, 43400 UPM Serdang, Selangor, Malaysia; email: sprovash@yahoo.com								14590255					English	J. Food Agric. Environ.	Article	Scopus	Food Security
Banerjee A., Ghosh S., Ghosh M.	Thermo-oxidative degradation of some common edible oils during frying	2013	Journal of the Indian Chemical Society	90	8		1183	1188			http://www.scopus.com/inward/record.url?eid=2-s2.0-84885676068&partnerID=40&md5=1cc36adaeed427424a83486146b84da2	Department of Chemical Technology, University College of Science and Technology, University of Calcutta, 92, Acharya Prafulla Chandra Road, Kolkata-700 009, India	Banerjee, A., Department of Chemical Technology, University College of Science and Technology, University of Calcutta, 92, Acharya Prafulla Chandra Road, Kolkata-700 009, India; Ghosh, S., Department of Chemical Technology, University College of Science a	The present study includes the deterioration of four widely used frying oils in India, viz. soybean oil, sunflower oil, rice bran oil and palm olein oil during frying at higher temperature. The oil samples were heated at 180-190°C for 24 h along with pota	Deep-frying; Palm olein oil; Potato chips; Rice bran oil; Soybean oil; Sunflower oil	alkadiene; edible oil; iodine; pam olein oil; peroxide; rice bran oil; soybean oil; sunflower oil; unclassified drug; article; conjugation; degradation; frying; high temperature; India; potato; rice bran; thermostability		iodine, 7553-56-2; peroxide, 14915-07-2; soybean oil, 8001-22-7; sunflower oil, 8001-21-6				Sam Saguy, I., Dina, D., (2003) J. Food Engineering, 56, p. 143; Kaunitz, H., Johnson, R.E., Reagues, L., (1965) J. Am. Oil Chem. Soc., 42, p. 770; Cuesta, C., Sanchez-Muniz, F.J., Garrido-Polonio, C., Lopez-Varela, S., Arroyo, R., (1993) J. Am. Oil Chem.	Ghosh, M.; Department of Chemical Technology, University College of Science and Technology, University of Calcutta, 92, Acharya Prafulla Chandra Road, Kolkata-700 009, India; email: mahuag@gmail.com								194522		JICSA			English	J. Indian Chem. Soc.	Article	Scopus	Heat stress
Sahu S., Sett M., Kjellstrom T.	Heat exposure, cardiovascular stress and work productivity in rice harvesters in India: Implications for a climate change future	2013	Industrial Health	51	4		424	431		2	http://www.scopus.com/inward/record.url?eid=2-s2.0-84883439665&partnerID=40&md5=cb3b7cac9367f1720bb8aff098bafc41	Ergonomics and Occupational Physiology Laboratory, Department of Physiology, University of Kalyani, India; Centre for Global Health Research, Unit for Epidemiology and Global Health, Umea University, Sweden; National Centre for Epidemiology and Population	Sahu, S., Ergonomics and Occupational Physiology Laboratory, Department of Physiology, University of Kalyani, India; Sett, M., Ergonomics and Occupational Physiology Laboratory, Department of Physiology, University of Kalyani, India; Kjellstrom, T., Centr	Excessive workplace heat exposures create well-known risks of heat stroke, and it limits the workers' capacity to sustain physical activity. There is very limited evidence available on how these effects reduce work productivity, while the quantitative rel	Cardiovascular effects; Climate; Climate change; Heat; Heat strain; Productivity; Work							Parsons, K., Human thermal environments (2003) The effects of hot, moderate and cold temperatures on human health, comfort and performance, , 2nd Ed., Taylor & Francis, London; Bridger, R.S., (2003) Introduction to ergonomics, , 2nd Ed., Taylor & Francis,	Kjellstrom, T.; Centre for Global Health Research, Unit for Epidemiology and Global Health, Umea UniversitySweden; email: kjellstromt@yahoo.com								198366		INHEA	10.2486/indhealth.2013-0006		English	Ind. Health	Article	Scopus	Heat stress, climate
Nargis F., Lee S.H.	A non-parametric efficiency analysis of Boro and Aman rice production in selected areas of the Mymensingh district in Bangladesh	2013	Journal of Food, Agriculture and Environment	11	2014-03-04		717	724			http://www.scopus.com/inward/record.url?eid=2-s2.0-84887593643&partnerID=40&md5=90d00a69165a2a31bd91cc8d13532182	Department of Agricultural Economics, Sunchon National University, Sunchon, Jeonnam, 540-950, South Korea	Nargis, F., Department of Agricultural Economics, Sunchon National University, Sunchon, Jeonnam, 540-950, South Korea; Lee, S.H., Department of Agricultural Economics, Sunchon National University, Sunchon, Jeonnam, 540-950, South Korea	This study explores data envelopment analysis efficiency scores based on field-level data of 178 rice farmers selected in 2010 from some of the major rice growing villages in the Mymensingh district of Bangladesh. The technical, allocative, economic, and	Bangladesh; Data envelopment analysis; Efficiency; Rice farmers; Tobit regression	organic fertilizer; agricultural parameters; agricultural worker; article; Bangladesh; cost minimization analysis; crop production; economic aspect; human; irrigation (agriculture); mass medium; nonhuman; nonparametric test; plant growth; power supply; pr						Afriat, S.N., Efficiency estimation of production function (1972) Int. Econ. Rev., 13, pp. 568-598; Alam, A., Kobayashi, H., Matsuda, T., Ishida, A., Matsumura, I., Esham, M., Stochastic frontier approach to measure technical efficiency of two irrigation	Department of Agricultural Economics, Sunchon National University, Sunchon, Jeonnam, 540-950, South Korea								14590255					English	J. Food Agric. Environ.	Article	Scopus	Irrigation cost
Mukherjee V., Das A., Akhand A., Gupta G.	Toxicity and profitability of rice cultivation under wastewater irrigation: The case of the East Calcutta Wetlands	2013	Ecological Economics	93			292	300			http://www.scopus.com/inward/record.url?eid=2-s2.0-84880369733&partnerID=40&md5=91533a6acf1640a6d3925755db4ea9cc	Department of Economics, Jadavpur University, Kolkata 700032, India; School of Oceanographic Studies, Jadavpur University, Kolkata 700032, India	Mukherjee, V., Department of Economics, Jadavpur University, Kolkata 700032, India; Das, A., Department of Economics, Jadavpur University, Kolkata 700032, India; Akhand, A., School of Oceanographic Studies, Jadavpur University, Kolkata 700032, India; Gupt	The paper reports the results of an empirical study on profitability of rice cultivation in the East Calcutta Wetlands (ECW) region where untreated sewage from the city of Kolkata (earlier Calcutta), India, is used for the purpose of irrigation during the	Heavy metal pollution; Profitability; Rice cultivation; Toxicity; Wastewater irrigation	canal; cost-benefit analysis; crop production; cultivation; ecological economics; empirical analysis; irrigation; lead; mercury (element); nutrient; rice; sewage; toxicity; East Kolkata Wetlands; India; West Bengal						Alloway, B.J., (1995) Heavy Metals in Soils, , Blackie Academic and Professional, Glasgow; Arnade, C., Trueblood, M., Estimating a profit function in the presence of inefficiency: an application to Russian agriculture (2002) Journal of Agricultural and Re	Gupta, G.; Department of Economics, Jadavpur University, Kolkata 700032, India; email: gautamju@yahoo.com								9218009		ECECE	10.1016/j.ecolecon.2013.06.010		English	Ecol. Econ.	Article	Scopus	Irrigation cost
Alam M.M., Karim M.R., Ladha J.K.	Integrating best management practices for rice with farmers' crop management techniques: A potential option for minimizing rice yield gap	2013	Field Crops Research	144			62	68			http://www.scopus.com/inward/record.url?eid=2-s2.0-84874577860&partnerID=40&md5=df6a3d16abc002c79881412f399a37c0	International Rice Research Institute (IRRI), Bangladesh Office, House-9, Road 2/2, Banani, Dhaka 1213, Bangladesh; IRRI India Office, 1st Floor, CG Block, NASC Complex, DPS Marg, New Delhi 110012, India	Alam, M.M., International Rice Research Institute (IRRI), Bangladesh Office, House-9, Road 2/2, Banani, Dhaka 1213, Bangladesh; Karim, M.R., International Rice Research Institute (IRRI), Bangladesh Office, House-9, Road 2/2, Banani, Dhaka 1213, Bangladesh	The major cereal cropping system in Bangladesh is rice (Oryza sativa L.) in the dry season (Boro) - rice in the wet season (Aman). The average productivity (7tha-1) of this system is far below attainable yields (14tha-1) in farmers' fields, resulting in a	Leaf color chart; Net profit; Productivity; Rice-rice cropping system; Yield gap	best management practice; cereal; comparative study; crop plant; crop yield; cropping practice; dry season; farmers knowledge; optimization; rice; seasonal variation; yield response; Bangladesh						Alam, M.M., Ladha, J.K., Foyjunnessa Rahman, Z., Khan, S.R., Rashid, H., Khan, A.H., Buresh, R.J., Nutrient management for increased productivity of rice-wheat cropping system in Bangladesh (2006) Field Crops Res., 96, pp. 374-386; Alam, M.M., Ladha, J.K.	Ladha, J.K.; IRRI India Office, 1st Floor, CG Block, NASC Complex, DPS Marg, New Delhi 110012, India; email: j.k.ladha@irri.org								3784290		FCRED	10.1016/j.fcr.2013.01.010		English	Field Crops Res.	Article	Scopus	knowledge
Sarker M.A.R., Alam K., Gow J.	Assessing the determinants of rice farmers' adaptation strategies to climate change in Bangladesh	2013	International Journal of Climate Change Strategies and Management	5	4		382	403			http://www.scopus.com/inward/record.url?eid=2-s2.0-84885443164&partnerID=40&md5=e8b1351ab95dc066c2edbd1fb528defc	Department of Economics, University of Rajshahi, Rajshahi, Bangladesh; School of Accounting, Economics and Finance, University of Southern Queensland, Toowoomba, Australia; Health Economics and HIV/AIDS Research Division (HEARD), University of KwaZulu-Nat	Sarker, M.A.R., Department of Economics, University of Rajshahi, Rajshahi, Bangladesh, School of Accounting, Economics and Finance, University of Southern Queensland, Toowoomba, Australia; Alam, K., School of Accounting, Economics and Finance, University	Purpose: This paper aims to examine rice farmers' selection of adaptation strategies to cope with and offset the effects of climate change and the determinants of those selections in Rajshahi, a severely drought-prone district of Bangladesh. Design/method	Adaptation; Bangladesh; Climate change; MNL; Perception	adaptation; climate change; education; electricity; farm; farm size; farmers knowledge; gender; growing season; income; perception; rice; selection; Bangladesh; Rajshahi						Agrawal, A., The role of local institutions in adaptation to climate change (2008) Paper presented at the Social Dimentions of Climate Change Workshop, Social Development Department, The World Bank, Washington, DC; Ahmed, A.K., Chowdhury, E.H., Study on L	Sarker, M. A. R.; Department of Economics, University of Rajshahi, Rajshahi, Bangladesh; email: rashid_econ@ru.ac.bd								17568692			10.1108/IJCCSM-06-2012-0033		English	Int. J. Clim. Change Strateg. Manage.	Article	Scopus	knowledge, climate
Abro G.H., Syed T.S., Shah A.H., Cui J., Sattar M., Awan M.S.	Efficacy and economics of different insecticides against stem borers, Scirpophaga incertulas (Walker) in rice crop	2013	Pakistan Journal of Zoology	45	4		929	933			http://www.scopus.com/inward/record.url?eid=2-s2.0-84884127034&partnerID=40&md5=c0f537527de37c2b3c40270ed6cc34c6	Department of Entomology, Sindh Agriculture University, Tandojam, Pakistan; Cotton Research Institute, Chinese Academy of Agricultural Sciences, Anyang, Henen 455112, China; Plant Protection Division, Nuclear Institute for Agriculture and Biology, Faisala	Abro, G.H., Department of Entomology, Sindh Agriculture University, Tandojam, Pakistan; Syed, T.S., Department of Entomology, Sindh Agriculture University, Tandojam, Pakistan; Shah, A.H., Department of Entomology, Sindh Agriculture University, Tandojam, P	The present study on the efficacy of insecticides in reducing the infestation of rice stem borer, Scirpophaga incertulas (Walker) was conducted during 2008. The seed of rice (Cv. IRRI-6) was sown in the fourth week of June and transplanted in the fourth w	Lepidoptera; Oryza sativa; Pesticide	comparative study; cost-benefit analysis; crop yield; disease control; disease incidence; disease severity; disease treatment; insecticide; rice						Abro, G.H., Lakho, G.M., Syed, T.S., Relative resistance of some rice cultivars to yellow, Scripophaga incertulas (Walk) stem borer (2003) Pakistan J. Zool, 35, pp. 85-90; Catling, H.D., Islam, Z., Problem of yellow rice stem borer in Asian deep water ric	Sattar, M.; Plant Protection Division, Nuclear Institute for Agriculture and Biology, Faisalabad, Pakistan; email: msattar73@yahoo.com								309923		PJZOA			English	Pak. J. Zool.	Article	Scopus	LS pest
Sharmah D., Deka K.C., Phukan A.K.	Laboratory evaluation of Efficacy of some plant based dusts against rice bug (Leptocorisa oratorious Fabr.) Assam, India	2013	Ecology, Environment and Conservation	19	1		89	93			http://www.scopus.com/inward/record.url?eid=2-s2.0-84877975539&partnerID=40&md5=3f1afd0b4c98142b64dc11618f109ffb	KVK (ICAR), South Tripura, Tripura, India; Department of Entomology, B.N. Collage of Agriculture, Assam 784 176, India; Department of Plant Pathology, Assam Agricultural University, Jorhat 13, Assam, India	Sharmah, D., KVK (ICAR), South Tripura, Tripura, India; Deka, K.C., Department of Entomology, B.N. Collage of Agriculture, Assam 784 176, India; Phukan, A.K., Department of Plant Pathology, Assam Agricultural University, Jorhat 13, Assam, India	Efficacy of neem (Azadirachta indica A.Jass), Soap nut (Sapindus trifoliatus L.) and their formulations and Malathion as standard insecticide were evaluated against the rice bug (Leptocorisa oratorious Fabr.) during 2000-2001 on the basis of per cent mort	Dust; Malathion and rice bug; Neem; Soap nut	biological control; crop pest; dicotyledon; insecticide; integrated pest management; laboratory method; malathion; neem; Assam; India						Abbot, W.S., A method of computing the effectiveness of an insecticide (1925) Journal of Economic Entomology, 18, pp. 266-267; (1975) Annual Report, p. 114. , Anonymous, ICAR Research Complex for NEH Region, Barapani, Shillong; Ascher, K.P.S., Non convent	Sharmah, D.; C/o. Mrs. Rulee Khound, Janapath, Club Road, Jorhat-1, Assam, India; email: dasharmah@gmail.com								0971765X		EECOF			English	Ecol. Environ. Conserv.	Article	Scopus	LS pest
Valarmathi P., Rabindran R., Velazhahan R., Suresh S., Robin S.	First report of Rice orange leaf disease phytoplasma (16 SrI) in rice (Oryza sativa) in India	2013	Australasian Plant Disease Notes	8	1		141	143			http://www.scopus.com/inward/record.url?eid=2-s2.0-84890899371&partnerID=40&md5=1aba931759e952dbd4e588b6429e3480	Department of Plant Pathology, Centre for Plant Protection Studies, Tamil Nadu Agricultural University, Coimbatore 641 003 Tamil Nadu, India; Department of Rice, Centre for Plant Breeding and Genetics, Tamil Nadu Agricultural University, Coimbatore 641 00	Valarmathi, P., Department of Plant Pathology, Centre for Plant Protection Studies, Tamil Nadu Agricultural University, Coimbatore 641 003 Tamil Nadu, India, Department of Rice, Centre for Plant Breeding and Genetics, Tamil Nadu Agricultural University, C	Rice (Oryza sativa L.,) is one of the most important cereal crops worldwide. In this study, phytoplasmas have been detected in symptomatic leaves of four varieties of rice using nested-PCR with primer pairs P1/P7 and R16F2n/R16R2, which amplified a 1.2 kb	Nested PCR; Orange leaf phytoplasma; Rice							Adkar-Purushothama, C.R., Casati, P., Quaglino, F., Durante, G., Bianco, P.A., First report of a 'Candidatus Phytoplasma asteris' -related strain associated with a yellows disease of black pepper (Piper nigrum) in India (2009) Plant Pathol, 58, p. 789. ,	Valarmathi, P.; Department of Plant Pathology, Centre for Plant Protection Studies, Tamil Nadu Agricultural University, Coimbatore 641 003 Tamil Nadu, India; email: valarpath@gmail.com								1833928X			10.1007/s13314-013-0117-7		English	Australas. Plant Dis. Notes	Article	Scopus	LSP disease
Bhattacharya S., Chakraborty K., Pal T.K.	Induction of systemic resistance in rice by leaf extracts of Datura metel against sheath blight disease	2013	Archives of Phytopathology and Plant Protection	46	18		2259	2269			http://www.scopus.com/inward/record.url?eid=2-s2.0-84887994464&partnerID=40&md5=751b996a8c3f429c0f5f9c2a7b33ec15	Department of Biotechnology, Bengal Institute of Technology, Kolkata, India; Department of Biochemistry, University of Calcutta, Kolkata, India	Bhattacharya, S., Department of Biotechnology, Bengal Institute of Technology, Kolkata, India; Chakraborty, K., Department of Biochemistry, University of Calcutta, Kolkata, India; Pal, T.K., Department of Biotechnology, Bengal Institute of Technology, Kol	The leaf extracts of Datura metel [both aqueous leaf extract (ALE) and ethanolic leaf extract (ELE)] were observed here to find if they can induce systemic resistance in the rice commonly found in Eastern India. The results showed that after the treatment	enzyme activity; induced systemic resistance; leaf extracts	Datura metel; Thanatephorus cucumeris						Beers Jr., R.F., Sizer, I.W., A spectrophotometric method for measuring the breakdown of hydrogen peroxide by catalase (1952) J Biol Chem, 195, pp. 133-140; Chance, B., Maehly, A.C., (1955) Methods in Enzymology II, pp. 773-775. , In: Colowick SP, Kaplan	Pal, T. K.; Department of Biotechnology, Bengal Institute of Technology, Kolkata, India; email: tapankpal@gmail.com								3235408			10.1080/03235408.2013.792537		English	Arch. Phytopathol. Plant Prot.	Article	Scopus	LSP disease
Mizobuchi R., Sato H., Fukuoka S., Tanabata T., Tsushima S., Imbe T., Yano M.	Mapping a quantitative trait locus for resistance to bacterial grain rot in rice	2013	Rice	6	1		1	10			http://www.scopus.com/inward/record.url?eid=2-s2.0-84885959723&partnerID=40&md5=2ea66438080e0c18951723250c2352b8	National Institute of Agrobiological Sciences, 2-1-2 Kannondai, Tsukuba, Ibaraki, 305-8602, Japan; National Agriculture and Food Research Organization (NARO), Institute of Crop Science, 2-1-18 Kannondai, Tsukuba, Ibaraki, 305-8518, Japan; RIKEN Center for	Mizobuchi, R., National Institute of Agrobiological Sciences, 2-1-2 Kannondai, Tsukuba, Ibaraki, 305-8602, Japan; Sato, H., National Agriculture and Food Research Organization (NARO), Institute of Crop Science, 2-1-18 Kannondai, Tsukuba, Ibaraki, 305-8518	Background: Bacterial grain rot (BGR), caused by the bacterial pathogen Burkholderia glumae, is a destructive disease of rice. Because BGR tends to be highly affected by environmental conditions such as temperature and humidity, it is difficult to evaluat	Bacterial grain rot; Burkholderia glumae; Cut-panicle inoculation; Disease resistance; Mapping; Oryza sativa L; QTL							Chien, C.C., Chang, Y.C., The susceptibility of rice plants at different growth stages and 21 commercial rice varieties to Pseudomonas glumae (1987) J Agric Res China, 36, pp. 302-310; Cottyn, B., Cerez, M.T., VanOutryve, M.F., Barroga, J., Swings, J., Me	Mizobuchi, R.; National Institute of Agrobiological Sciences, 2-1-2 Kannondai, Tsukuba, Ibaraki, 305-8602, Japan; email: ritsuko@affrc.go.jp								19398425			10.1186/1939-8433-6-1		English	Rice	Article	Scopus	LSP disease
Singh P., Siva R., Gothandam K.M., Babu S.	Naturally Existing Levels of Osmyb4 Gene Expression in Rice Cultivars Correlate with their Reaction to Fungal and Bacterial Pathogens	2013	Journal of Phytopathology	161	10		730	734			http://www.scopus.com/inward/record.url?eid=2-s2.0-84883749391&partnerID=40&md5=f1b3bd7df61cd236413744d1fe5026c6	School of Bio Sciences and Technology, VIT University, Vellore, 632014, India	Singh, P., School of Bio Sciences and Technology, VIT University, Vellore, 632014, India; Siva, R., School of Bio Sciences and Technology, VIT University, Vellore, 632014, India; Gothandam, K.M., School of Bio Sciences and Technology, VIT University, Vell	Accumulating functional genomic data in rice are unveiling the role of regulatory genes and their significance in modulating responses to complex traits like stress tolerance. Rice Osmyb4 is one such gene coding for transcription factor, and the homologou	India; Osmyb4; Resistance; Rice bacterial leaf blight; Rice sheath blight; Transcription factor	cultivar; disease; disease resistance; gene; gene expression; inoculation; pathogen; rice; India; Bacteria (microorganisms); Thanatephorus cucumeris; Xanthomonas oryzae; Xanthomonas oryzae pv. oryzae						Anand, A., Zhou, T., Trick, H.N., Gill, B.S., Bockus, W.W., Muthukrishanan, S., Greenhouse and field testing of transgenic wheat plants stably expressing genes for thaumatin like protein, chitinase and glucanase against Fusarium graminearum (2003) J Exp B	Babu, S.; School of Bio Sciences and Technology, VIT University, Vellore, India; email: babu.s@vit.ac.in								9311785		JPHYE	10.1111/jph.12114		English	J. Phytopathol.	Article	Scopus	LSP disease
Imam J., Alam S., Variar M., Shukla P.	Identification of rice blast resistance gene Pi9 from Indian rice land races with STS marker and its verification by virulence analysis	2013	Proceedings of the National Academy of Sciences India Section B - Biological Sciences	83	4		499	504			http://www.scopus.com/inward/record.url?eid=2-s2.0-84890301930&partnerID=40&md5=c8b0387334bd8bc1efd5990329be8c2d	Biotechnology Laboratory, Central Rainfed Upland Rice Research Station (CRRI), Hazaribagh 825301 Jharkhand, India; Enzyme Technology and Protein Bioinformatics Laboratory, Department of Microbiology, Maharshi Dayanand University, Rohtak 124001 Haryana, In	Imam, J., Biotechnology Laboratory, Central Rainfed Upland Rice Research Station (CRRI), Hazaribagh 825301 Jharkhand, India, Enzyme Technology and Protein Bioinformatics Laboratory, Department of Microbiology, Maharshi Dayanand University, Rohtak 124001 H	The Pi9 gene in rice confers resistance to strains of blast pathogen Magnaporthe oryzae. Pi9 is a typical broad spectrum resistance gene containing nucleotide binding site, leucine rich repeat family of sequences. In the present study, presence of the Pi9	Blast resistance; Marker assisted selection; Oryza sativa; Pi9 gene							Wang, Z., Jia, Y., Rutger, J.N., Xia, Y., Rapid survey for presence of a blast resistance gene Pi-ta in rice cultivars using the dominant DNA markers derived from portions of the Pi-ta gene (2007) Plant Breed, 126, pp. 36-42. , 10.1111/j.1439-0523.2007.01	Variar, M.; Biotechnology Laboratory, Central Rainfed Upland Rice Research Station (CRRI), Hazaribagh 825301 Jharkhand, India; email: mukund.variar@gmail.com								3698211			10.1007/s40011-013-0186-6		English	Proc. Natl. Acad. Sci. India Sect. B - Biol. Sci.	Article	Scopus	LSP disease
Kumari A., Das A., Devanna B.N., Thakur S., Singh P.K., Singh N.K., Sharma T.R.	Mining of rice blast resistance gene Pi54 shows effect of single nucleotide polymorphisms on phenotypic expression of the alleles	2013	European Journal of Plant Pathology	137	1		55	65			http://www.scopus.com/inward/record.url?eid=2-s2.0-84881255757&partnerID=40&md5=dc054f8093ded009f2894fcca3893f12	National Research Centre on Plant Biotechnology, Indian Agricultural Research Institute, 39, LBS Centre, Pusa Campus, New Delhi, 110012, India; Division of Crop Improvement, Indian Institute of Pulses Research, Kanpur, 208 024 Uttar Pradesh, India	Kumari, A., National Research Centre on Plant Biotechnology, Indian Agricultural Research Institute, 39, LBS Centre, Pusa Campus, New Delhi, 110012, India; Das, A., Division of Crop Improvement, Indian Institute of Pulses Research, Kanpur, 208 024 Uttar P	The rice blast resistance gene Pi54 (formerly Pi-k h) isolated from indica rice line Tetep confers broad spectrum resistance to different strains of Magnaporthe oryzae in India. In this study, we performed PCR based allele mining for blast resistance gene	Alleles; Blast resistance; Pikh; Rice; Rice blast fungus; Wild rice species	allele; cultivar; disease control; disease resistance; divergence; fungus; gene expression; genetic engineering; host-pathogen interaction; phenotypic plasticity; polymorphism; rice; wild population; India; Magnaporthe grisea; Magnaporthe oryzae; Zizania						Ashfield, T., Ong, L.E., Nobuta, K., Schneider, C.M., Innes, R.W., Convergent evolution of disease resistance gene specificity in two flowering plant families (2004) The Plant Cell, 16, pp. 309-354; Aso, T., Haque, D., Barstead, R.J., Conaway, R.C., Conaw	Sharma, T. R.; National Research Centre on Plant Biotechnology, Indian Agricultural Research Institute, 39, LBS Centre, Pusa Campus, New Delhi, 110012, India; email: trsharma@nrcpb.org								9291873		EPLPE	10.1007/s10658-013-0216-5		English	Eur. J. Plant Pathol.	Article	Scopus	LSP disease
Thakur S., Gupta Y.K., Singh P.K., Rathour R., Variar M., Prashanthi S.K., Singh A.K., Singh U.D., Chand D., Rana J.C., Singh N.K., Sharma T.R.	Molecular diversity in rice blast resistance gene Pi-ta makes it highly effective against dynamic population of Magnaporthe oryzae	2013	Functional and Integrative Genomics	13	3		309	322			http://www.scopus.com/inward/record.url?eid=2-s2.0-84882243816&partnerID=40&md5=d0e1e9079c1096cdccb6fd02e07af4f2	National Research Centre on Plant Biotechnology, IARI Pusa Campus, New Delhi 110012, India; CSK Himachal Pradesh Agricultural University, Palampur Himachal Pradesh 176062, India; Central Rainfed Upland Rice Research Station, CRRI, Hazaribagh Jharkhand 825	Thakur, S., National Research Centre on Plant Biotechnology, IARI Pusa Campus, New Delhi 110012, India, Himachal Pradesh University, Shimla 171005, India; Gupta, Y.K., National Research Centre on Plant Biotechnology, IARI Pusa Campus, New Delhi 110012, In	Rice blast is one of the important diseases of rice which can be effectively managed by the deployment of resistance genes. Pi-ta is one of the major blast resistant genes effective against pathogen populations in different parts of India. We analysed all	Blast resistance gene; Haplotypes; Magnaporthe oryzae; Oryza species; Pi-ta; Polymorphism; Rice landraces	leucine; allele; amino acid sequence; article; controlled study; cultivar; disease resistance; gene deletion; gene insertion; gene locus; genetic heterogeneity; genetic selection; genetic variability; geography; haplotype; India; interspecific relationshi	GENBANK: AF207842, HE578898, HE578899, HE578900, HE578901, HE578902, HE578903, HE580105, HE580106, HE580170, HE580171, HE589945, HE589946, HE589947, HE589948, HE589949, HE589950, HE589951, HE589952, HE589953, HE589954, HE661558, HE661559, HE661560, HE6615	leucine, 61-90-5, 7005-03-0; Pi-ta protein, Oryza sativa; Plant Proteins; Receptors, Cytoplasmic and Nuclear				Ashikawa, I., Wu, J., Matsumoto, T., Ishikawa, R., Haplotype diversity and molecular evolution of the rice Pikm locus for blast resistance (2009) J Gen Plant Pathol, pp. 1-6; Bakker, E.G., Toomajian, C., Kreitman, C., Bergelson, J., A genome-wide survey o	Sharma, T.R.; National Research Centre on Plant Biotechnology, IARI Pusa Campus, New Delhi 110012, India; email: trsharma@nrcpb.org								1438793X		FIGUB	10.1007/s10142-013-0325-4	23818197	English	Funct. Integr. Genomics	Article	Scopus	LSP disease
Shikari A.B., Khanna A., Krishnan S.G., Singh U.D., Rathour R., Tonapi V., Sharma T.R., Nagarajan M., Prabhu K.V., Singh A.K.	Molecular analysis and phenotypic validation of blast resistance genes Pita and Pita2 in landraces of rice (Oryza sativa L.)	2013	Indian Journal of Genetics and Plant Breeding	73	2		131	141		1	http://www.scopus.com/inward/record.url?eid=2-s2.0-84877968017&partnerID=40&md5=e7da7e5ca1480dc0c97b9dd9ae3ccf85	Division of Genetics, Indian Agricultural Research Institute, New Delhi 110 012, India; Division of Plant Pathology, Indian Agricultural Research Institute, New Delhi 110 012, India; Department of Biotechnology, CSKHPKV, Palampur, H.P, India; Division of	Shikari, A.B., Division of Genetics, Indian Agricultural Research Institute, New Delhi 110 012, India; Khanna, A., Division of Genetics, Indian Agricultural Research Institute, New Delhi 110 012, India; Krishnan, S.G., Division of Genetics, Indian Agricul	Rice (Oryza sativa L.) crop confronts several major and minor diseases of which blast disease caused by Magnaporthe oryzae is a serious constraint causing moderate to huge economic losses world over. Exploitation of genetic resistance in cultivars is a pr	Landraces; Markers; Pita; Pita2; Resistance; Rice blast							Geddes, A.M.W., Lles, M., The relative importance of crop pests in South Asia (1991) Nat. Resour. Inst. Bull, , No. 39. Natural Resource Institute, Chatham, Maritime, Kent, UK; Skamnioti, P., Gurr, S.J., Against the grain: Safeguarding rice from rice blas	Singh, A. K.; Division of Genetics, Indian Agricultural Research Institute, New Delhi 110 012, India; email: aks_gene@yahoo.com								195200			10.5958/j.0975-6906.73.2.020		English	Indian J. Genet. Plant Breed.	Article	Scopus	LSP disease
Thakur S., Singh P.K., Rathour R., Variar M., Prashanthi S.K., Singh A.K., Singh U.D., Chand D., Singh N.K., Sharma T.R.	Positive selection pressure on rice blast resistance allele Piz-t makes it divergent in Indian land races	2013	Journal of Plant Interactions	8	1		34	44		1	http://www.scopus.com/inward/record.url?eid=2-s2.0-84872583549&partnerID=40&md5=e27c9a19026069973a4320d129926a7b	National Research Centre on Plant Biotechnology, IARI, New Delhi, 110012, India; Deparment of Biotechnology, Himachal Pradesh University, Shimla, 171005, India; Department of Agricultural Biotechnology, CSK Himachal Pradesh Agricultural University, Palamp	Thakur, S., National Research Centre on Plant Biotechnology, IARI, New Delhi, 110012, India, Deparment of Biotechnology, Himachal Pradesh University, Shimla, 171005, India; Singh, P.K., National Research Centre on Plant Biotechnology, IARI, New Delhi, 110	Allelic variants of the broad-spectrum blast resistance gene, Piz-t, have been analyzed in 48 rice lines selected after phenotyping across three blast hot-spot regions of India. Single Nucleotide Polymorhisms in the form of transitions were more frequent	allele mining; blast resistance genes; Piz-t; polymorphism; rice land races							Amante-Bordeos, A., Sitch, L.A., Nelson, R., Damacio, R.D., Oliva, N.P., Aswidinnoor, H., Leung, H., Transfer of bacterial blight and blast resistance from the tetraploid wild rice Oryza minuta to cultivated rice, Oryza sativa (1992) Theor Appl Genet., 84	Sharma, T. R.; National Research Centre on Plant Biotechnology, IARI, New Delhi, 110012, India; email: trsharma@nrcpb.org								17429145			10.1080/17429145.2012.721523		English	J. Plant Interact.	Article	Scopus	LSP disease
Gouda P.K., Saikumar S., Varma C.M.K., Nagesh K., Thippeswamy S., Shenoy V., Ramesha M.S., Shashidhar H.E.	Marker-assisted breeding of Pi-1 and Piz-5 genes imparting resistance to rice blast in PRR78, restorer line of Pusa RH-10 Basmati rice hybrid	2013	Plant Breeding	132	1		61	69		1	http://www.scopus.com/inward/record.url?eid=2-s2.0-84872671899&partnerID=40&md5=9b8d5db6b5acbf12a0bee3aaa98bacf0	Barwale Foundation Barwale Chambers, #3-6-666, Street No. 10, Himayathnagar Hyderabad 500 029, India; Monsanto India Ltd, Bangalore, 560 092, India; DuPont Knowledge Centre, ICICI Knowledge Park, Shamirpet, Hyderabad, 500 078, India; Syngenta India Limite	Gouda, P.K., Barwale Foundation Barwale Chambers, #3-6-666, Street No. 10, Himayathnagar Hyderabad 500 029, India, Monsanto India Ltd, Bangalore, 560 092, India; Saikumar, S., Barwale Foundation Barwale Chambers, #3-6-666, Street No. 10, Himayathnagar Hyd	Rice blast, caused by fungus Magnaporthe grisea, is a serious disease causing considerable economic damage worldwide. Best way to overcome disease is to breed for disease-resistant cultivars/parental lines of hybrids. Pusa RH10, first aromatic, fine-grain	Blast; Magnaporthe grisea; Marker-assisted selection; Rice	Fungi; Magnaporthe grisea; Pusa						Asaga, K., A procedure for evaluating Weld resistance to blast in rice varieties (1981) J. Cent. Agric. Stn., 35, pp. 51-138; Ashikawa, I., Hayashi, N., Yamane, H., Kanamori, H., Wu, J., Matsumoto, T., Ono, K., Yano, M., Two adjacent nucleotide binding si	Varma, C.M.K.; Barwale Foundation Barwale Chambers, #3-6-666, Street No. 10, Himayathnagar Hyderabad 500 029, India; email: mohanvarma@barwalefoundation.org								1799541		PLABE	10.1111/pbr.12017		English	Plant Breed.	Article	Scopus	LSP disease
Pu B., Bingrong P.	Studies on water-saving and high-yield cultivation techniques of super rice	2013	BioTechnology: An Indian Journal	7	10		425	428			http://www.scopus.com/inward/record.url?eid=2-s2.0-84887162073&partnerID=40&md5=4026cbdc93d138d47412bbc40b5b8177	Wenzhou Vocational College of Science and Technology, Wenzhou, 325006, China	Pu, B., Wenzhou Vocational College of Science and Technology, Wenzhou, 325006, China; Bingrong, P., Wenzhou Vocational College of Science and Technology, Wenzhou, 325006, China	In recent years, the problems of food security and water shortages in the world have become more and more serious. The super hybrid rice has been applied on a large scale in China for its high yield,good quality and resisitance desease,which increases the	Cultivation techniques; High-yield; Super rice; Water-saving	Conventional cultivations; Drought resistance; High-yield; Methane emissions; Pollution reduction; Rice sheath blight; Super rice; Water-saving; Food supply; Irrigation; Methane; Water conservation; Water supply; Water pollution						Xiaolin, S., Linian, Y., Jianchang, Y., Watersaving and High-yielding Irrigation Techniques of Rice and Their Physiological and Ecological Effects (2010) Chinese Agricultural Science Bulletin, 26 (3), pp. 253-257; Nie, L., Peng, S., Chen, M., Aerobic rice	Pu, B.; Wenzhou Vocational College of Science and Technology, Wenzhou, 325006, China								9747435					English	Biotechnol. An Indian J.	Article	Scopus	LSP disease
Taguchi-Shiobara F., Ozaki H., Sato H., Maeda H., Kojima Y., Ebitani T., Yano M.	Mapping and validation of QTLs for rice sheath blight resistance	2013	Breeding Science	63	3		301	308			http://www.scopus.com/inward/record.url?eid=2-s2.0-84885156971&partnerID=40&md5=d94914a1bf7c65cf3a6d4fa97a50a801	National Institute of Agrobiological Sciences, 2-1-2 Kannondai, Tsukuba, Ibaraki 305-8602, Japan; Toyama Prefectural Agricultural, Forestry and Fisheries Research Center, 1124-1 Yoshioka, Toyama, Toyama 939-8153, Japan; National Agriculture and Food Resea	Taguchi-Shiobara, F., National Institute of Agrobiological Sciences, 2-1-2 Kannondai, Tsukuba, Ibaraki 305-8602, Japan; Ozaki, H., Toyama Prefectural Agricultural, Forestry and Fisheries Research Center, 1124-1 Yoshioka, Toyama, Toyama 939-8153, Japan, Ag	Sheath blight, caused by Rhizoctonia solani, is one of the most serious diseases of rice. Among 33 rice accessions, mainly from National Institute of Agrobiological Sciences (NIAS) Core Collection, we found three landraces from the Himalayas-Jarjan, Nepal	Chromosomal segment substitution line; CSSL; Oryza sativa L.; QTL; Rhizoctonia solani; Rice sheath blight resistance							Abe, T., Taguchi-Shiobara, F., Kojima, Y., Ebitani, T., Kuramata, M., Yamamoto, T., Yano, M., Ishikawa, S., Detection of a QTL for accumulating Cd in rice that enables efficient Cd phytoextraction from soil (2011) Breed. Sci., 61, pp. 43-51; Banniza, S.,	Taguchi-Shiobara, F.; National Institute of Agrobiological Sciences, 2-1-2 Kannondai, Tsukuba, Ibaraki 305-8602, Japan; email: fstagu@affrc.go.jp								13447610		BRSCE	10.1270/jsbbs.63.301		English	Breed. Sci.	Article	Scopus	LSP disease
Yadav S., Singh A., Goel N., Singh A.K.	Identification of Indian rice germplasm lines with bacterial leaf blight (BLB) resistance genes	2013	Indian Journal of Genetics and Plant Breeding	73	3		310	313			http://www.scopus.com/inward/record.url?eid=2-s2.0-84882290067&partnerID=40&md5=1867762f749fc7ca899cb44a6fb206e8	Division of Genetics, Indian Agricultural Research Institute, New Delhi 110 012, India; Division of Genomic Resources, National Bureau of Plant Genetic Resources, New Delhi 110 012, India	Yadav, S., Division of Genomic Resources, National Bureau of Plant Genetic Resources, New Delhi 110 012, India; Singh, A., Division of Genetics, Indian Agricultural Research Institute, New Delhi 110 012, India; Goel, N., Division of Genetics, Indian Agric	Bacterial leaf blight of rice, caused by Xanthomonas oryzae pv. oryzae is one of the major constraints limiting rice production and productivity in South East Asia, particularly in Japan, Philippines, Indonesia, China and India. No effective chemical cont	BLB; Germplasm; MABB; Molecular markers							Gnanamanickam, S.S., Brindha Priyadarisini, V., Narayanan, N.N., Preeti, V., Kavitha, S., An overview of bacterial blight disease of rice and strategies for its management (1999) Curr. Sci, 77, pp. 1435-1443; Khush, G.S., Ogawa, T., Major gene for resista	Yadav, S.; Division of Genomic Resources, National Bureau of Plant Genetic Resources, New Delhi 110 012, India; email: aks_gene@yahoo.com								195200			10.5958/j.0975-6906.73.3.045		English	Indian J. Genet. Plant Breed.	Article	Scopus	LSP disease
Spielman D.J., Kolady D.E., Ward P.S.	The prospects for hybrid rice in India	2013	Food Security	5	5		651	665			http://www.scopus.com/inward/record.url?eid=2-s2.0-84886697415&partnerID=40&md5=522327e2247ef1dcd651689d46c6ad3e	International Food Policy Research Institute, 2033 K St NW, Washington, DC, 20006, United States; International Programs, College of Agriculture and Life Sciences, Cornell University, Ithaca, NY, 14850, United States; International Food Policy Research In	Spielman, D.J., International Food Policy Research Institute, 2033 K St NW, Washington, DC, 20006, United States; Kolady, D.E., International Programs, College of Agriculture and Life Sciences, Cornell University, Ithaca, NY, 14850, United States; Ward, P	The government of India has set a target of expanding the cultivation of hybrid rice to 25 % of the area occupied by the crop by 2015. Current growth trends suggest that this target will not be met, despite the potential contribution of hybrid rice to lag	Agricultural research and development; Hybrid rice; India; Innovation; Technological change	agricultural market; agricultural research; cultivation; food security; hybrid; innovation; research and development; rice; technological change; India						Baig, S.U., (2009) Hybrid rice seed scenario in India: Problems and challenges, , www.apsaseed.org/docs/00b9aab6/ASC2009/SIG/HybridRice/Rice_India.pdf, Accessed June 2010; (2009) Barwale Foundation Annual Report 2008-09, , Barwale Foundation, Hyderabad, I	Spielman, D. J.; International Food Policy Research Institute, 2033 K St NW, Washington, DC, 20006, United States; email: d.spielman@cgiar.org								18764517			10.1007/s12571-013-0291-7		English	Food Secur.	Article	Scopus	Market, food security
Reardon T., Minten B., Chen K.Z., Adriano L.	The transformation of rice value chains in Bangladesh and India: Implications for food security	2013	ADB Economics Working Paper Series	375			1	30			http://www.scopus.com/inward/record.url?eid=2-s2.0-84884234456&partnerID=40&md5=8d4607991203f6a37df0a4057fb3a533	Michigan State University, International Food Policy Research Institute, Renmin University, China; International Food Policy Research Institute, China; Asian Development Bank, Philippines	Reardon, T., Michigan State University, International Food Policy Research Institute, Renmin University, China; Minten, B., International Food Policy Research Institute, China; Chen, K.Z., International Food Policy Research Institute, China; Adriano, L.,	This paper reports the survey findings that rice value chains are transforming in Bangladesh and India. The main elements of the transformation are as follows: First, rice value chains in both countries have begun to "geographically lengthen" and "interme	Agriculture in Bangladesh; Agriculture in India; Rice value chain; Stacked survey method	agricultural market; agricultural production; commodity price; food security; retailing; rice; Bangladesh; India; United States						Chowdhury, N., Haggblade, S., Evolving rice and wheat markets (2000) Out of the Shadow of Famine: Evolving Food Markets and Food Policy in Bangladesh, , In R. Ahmed, S. Haggblade, and T. Chowdhury, eds. Baltimore: Johns Hopkins University Press; Elitzak,	Michigan State University, International Food Policy Research Institute, Renmin UniversityChina								16555252					English	ADB Eco. Work. Pap. Ser.	Article	Scopus	Market, food security
Reddy M.V., Satpathy D., Dhiviya K.S.	Assessment of heavy metals (Cd and Pb) and micronutrients (Cu, Mn, and Zn) of paddy (Oryza sativa L.) field surface soil and water in a predominantly paddy-cultivated area at Puducherry (Pondicherry, India), and effects of the agricultural runoff on the e	2013	Environmental Monitoring and Assessment	185	8		6693	6704			http://www.scopus.com/inward/record.url?eid=2-s2.0-84879839022&partnerID=40&md5=04fb5d85bf6a02c8e28ea8bb890e1bf5	Department of Ecology and Environmental Sciences, Pondicherry University, Pondicherry 605 014, India	Reddy, M.V., Department of Ecology and Environmental Sciences, Pondicherry University, Pondicherry 605 014, India; Satpathy, D., Department of Ecology and Environmental Sciences, Pondicherry University, Pondicherry 605 014, India; Dhiviya, K.S., Departmen	The concentrations of toxic heavy metals - Cd and Pb and micronutrients - Cu, Mn, and Zn were assessed in the surface soil and water of three different stages of paddy (Oryza sativa L.) fields, the stage I - the first stage in the field soon after transpl	Agrochemicals; Cd; Fertilizers; Micronutrients; Mn; Oryza sativa; Paddy soil; Paddy water; Pesticides; Toxic heavy metals; Zn	Agrochemicals; Cd; Micronutrients; Oryza sativa; Paddy soils; Paddy waters; Toxic heavy metals; Agricultural chemicals; Copper; Fertilizers; Lead; Manganese; Manganese removal (water treatment); Pesticides; Seed; Soils; Trace elements; Zinc; Soil pollutio		cadmium, 22537-48-0, 7440-43-9; copper, 15158-11-9, 7440-50-8; lead, 13966-28-4, 7439-92-1; manganese, 16397-91-4, 7439-96-5; zinc, 14378-32-6, 7440-66-6; Environmental Pollutants; Metals, Heavy; Micronutrients; Soil; Soil Pollutants				Alloway, B.J., Soil factors associated with zinc deficiency in crops and humans (2009) Environmental Geochemical Health, 31, pp. 537-548. , 10.1007/s10653-009-9255-4 1:CAS:528:DC%2BD1MXhtVWrs77J; (2011) Deficiency in Soil Mars Farming, Green Revolution II	Reddy, M.V.; Department of Ecology and Environmental Sciences, Pondicherry University, Pondicherry 605 014, India; email: venkateshsrinivas1@gmail.com								1676369		EMASD	10.1007/s10661-012-3057-3	23435848	English	Environ. Monit. Assess.	Article	Scopus	Micronutrient
Sarwar N., Ali H., Ahmad A., Ullah E., Ahmad S., Mubeen K., Hill J.E.	Water wise rice cultivation on calcareous soil with the addition of essential micronutrients	2013	Journal of Animal and Plant Sciences	23	1		244	250		2	http://www.scopus.com/inward/record.url?eid=2-s2.0-84874771186&partnerID=40&md5=3c5108b60c47e6736584b51e99c4cdee	Department of Agronomy, Bahauddine Zakariya University Multan, Pakistan; Department of Agronomy, University of Agriculture Faisalabad, Pakistan; Department of Plant Sciences, University of California, Davis, United States	Sarwar, N., Department of Agronomy, Bahauddine Zakariya University Multan, Pakistan; Ali, H., Department of Agronomy, Bahauddine Zakariya University Multan, Pakistan; Ahmad, A., Department of Agronomy, University of Agriculture Faisalabad, Pakistan; Ullah	Increasing food production and water saving are the major challenges for rice growers at micronutrient deficient soil in Pakistan. Thus the field experiment was conducted focusing on two emerging deficient micronutrients (B and Zn) through soil applicatio	Boron and zinc; Rice; Water productivity; Yield attributes							Aslam, M., Hussain, S., Ramzan, M., Akhter, M., Effect of different stand establishment techniques on rice yields and its attributes (2008) The J. Anim. Pl. Sci, 18 (2-3), pp. 80-82; Beyrouty, C.A., Grigg, B.C., Norman, R.J., Wells, B.R., Nutrient uptake	Sarwar, N.; Department of Agronomy, Bahauddine Zakariya University MultanPakistan; email: bajwa834@gmail.com								10187081					English	J. Anim. Plant Sci.	Article	Scopus	Micronutrient
Hasnain Z., Ali H.	Location, nitrogenand zinc interactions on aromatic rice yield in central Punjab, Pakistan	2013	Research on Crops	14	4		1014	1022			http://www.scopus.com/inward/record.url?eid=2-s2.0-84894270768&partnerID=40&md5=12abd316ef36142347818ec8f012cbef	Adaptive Research Farm Sheikhupura and Sargodha (Punjab), Pakistan; Faculty of Agricultural Sciences and Technology (FAST), College of Agriculture, Bahauddin Zakariya University, Multan-60800, Pakistan	Hasnain, Z., Adaptive Research Farm Sheikhupura and Sargodha (Punjab), Pakistan, Faculty of Agricultural Sciences and Technology (FAST), College of Agriculture, Bahauddin Zakariya University, Multan-60800, Pakistan; Ali, H., Adaptive Research Farm Sheikhu	A field study was conducted to evaluate the effect of nitrogen (N) and zinc (Zn) application on yield and yield components of fine rice (cv. Super Basmati) at Adaptive Research Farm, Sheikhupura and Sargodha over a period of two growing seasons (2009 and	Aromatic rice; Correlation; Nitrogen; Yield; Zinc							Ahmad, S., Ashfaq, A., Zia-ul-Haq, M., Hakoomat, A., Tasneem, K., Anjum, M.A., Khan, M., Gerrit, H., Resources use efficiency of field grown transplanted rice (Oryza sativa L.) under irrigated semiarid environment (2009) J. Food Agric. & Envt., 7, pp. 487	Adaptive Research Farm Sheikhupura and Sargodha (Punjab)Pakistan								9723226					English	Res. Crops	Article	Scopus	nitrogen
Li B., He W.X., Wang C.Q., Li Y., Xu Q.	Effect of cadmium stress on ammonium assimilation enzymes and polyamine in the roots of rice (Oryza sativa) with different cadmium resistance	2013	International Journal of Applied Environmental Sciences	8	17		2203	2214			http://www.scopus.com/inward/record.url?eid=2-s2.0-84891692401&partnerID=40&md5=9957213aec3e4e63dd91dcb6bb261a0f	College of Resources and Environment, Northwest Agricultural and Forest Universit, Yang ling, Shaanxi 712100, China; College of Resource and Environment, Sichuan Agricultural Universit, Chengdu 611130, China	Li, B., College of Resources and Environment, Northwest Agricultural and Forest Universit, Yang ling, Shaanxi 712100, China, College of Resource and Environment, Sichuan Agricultural Universit, Chengdu 611130, China; He, W.X., College of Resources and Env	The characteristics of ammonium assimilation enzymes and polyamine (Spm) in roots of rice under Cd stress are not clear, meanwhile, the difference between rice cultivars is also worth to explore. In order to investigate the effects of ammonium assimilatio	Ammonium assimilation; Cadmium stress; PAs; Rice	Ammonium assimilation; Cadmium stress; Glutamate dehydrogenase; Glutamine synthetase; Hydroponic experiments; Nitrogen assimilation; PAs; Rice; Amino acids; Enzymes; Plants (botany); Cadmium; ammonium; assimilation efficiency; cadmium; cultivar; environme						El-Shora, H.E., Ali, A.S., Changes in activities of nitrogen metabolism enzymes in cadmium stressed marrow seedlings (2011) Asian Journal of Plant Sciences, 10, pp. 117-124; Street, H.E., Nitrogen metabolism of higher plants (2006) Advances in Enzymology	He, W. X.; College of Resources and Environment, Northwest Agricultural and Forest Universit, Yang ling, Shaanxi 712100, China; email: wxhe1968@1631.com								9736077					English	Int. J. Appl. Environ. Sci.	Article	Scopus	nitrogen
Yadav G.S., Datta M., Babu S., Debnath C., Sarkar P.K.	Growth and productivity of lowland rice (Oryza sativa) as influenced by substitution of nitrogen fertilizer by organic sources	2013	Indian Journal of Agricultural Sciences	83	10		1038	1042			http://www.scopus.com/inward/record.url?eid=2-s2.0-84887927661&partnerID=40&md5=f2c3593ff7d403aaf88b58b0a82c5181	ICAR Research Complex for NEH Region, Tripura Centre, Lembucherra, W Tripura, India; ICAR Research Complex for NEH Region, Sikkim Centre, India	Yadav, G.S., ICAR Research Complex for NEH Region, Tripura Centre, Lembucherra, W Tripura, India; Datta, M., ICAR Research Complex for NEH Region, Tripura Centre, Lembucherra, W Tripura, India; Babu, S., ICAR Research Complex for NEH Region, Tripura Centr	Field experiment was conducted during rabi and kharif seasons of 2011 and 2012 at research farm of ICAR-RC for NEH Region, Tripura centre, to assess the competence of different organic sources for substituting the 50% N fertilizer in integrated nutrient m	FYM; Glyricidia leaf; Grain yield; Panicle length; Productive tillers							Acharya, D., Mondal, S.S., Effect of integrated nutrient management on the growth, productivity and quality of crops in rice (Oryza sativa L.) - Cabbage (Brassica oleracea) greengram (Vigna radiata) cropping system (2010) Indian Journal of Agronomy, 55 (1	ICAR Research Complex for NEH Region, Tripura Centre, Lembucherra, W Tripura, India								195022		IJASA			English	Indian J. Agric. Sci.	Article	Scopus	nitrogen
Meena V.S., Maurya B.R., Verma R., Meena S.K.	Effect of concentrate manure and inorganic fertilizers on soil electro-chemical properties and productivity of rice {Oryza sativa L.) under inceptisol of Varanasi	2013	Annals of Biology	29	3		358	363			http://www.scopus.com/inward/record.url?eid=2-s2.0-84886701068&partnerID=40&md5=0769bb60a05c8761cbdc546f097e2de4	Department of Soil Science and Agricultural Chemistry, Banaras Hindu University, Varanasi (Uttar Pradesh), India; Department of Agronomy, India	Meena, V.S., Department of Soil Science and Agricultural Chemistry, Banaras Hindu University, Varanasi (Uttar Pradesh), India, Department of Agronomy, India; Maurya, B.R., Department of Soil Science and Agricultural Chemistry, Banaras Hindu University, Va	A field experiment was conducted in kharif season of 2009 at Agricultural Research Farm, BHU, Varanasi. The aim of this work was to focus the effect of concentrated manure (wellgrow grain and wellgrow soil) and inorganic fertilizers on nutrient status and	Available nutrients; Concentrate manure; Rice; Wellgrow; Yield	agricultural production; crop yield; electrochemical method; fertilizer application; Inceptisol; manure; nitrogen; nutrient availability; phosphorus; potassium; rice; India; Uttar Pradesh; Varanasi						Banger, K., Kukal, S.S., Toor, G., Sudhir, K., Hanumanthraju, T.H., Impact of long-term additions of chemical fertilizers and FYM on carbon and nitrogen sequestration under rice-cowpea cropping system in semi-arid tropics (2009) Plant Soil, 318, pp. 27-35	Department of Soil Science and Agricultural Chemistry, Banaras Hindu University, Varanasi (Uttar Pradesh), India								9700153		ANBIE			English	Ann. Biol.	Article	Scopus	nitrogen
Viji J., Neelanarayanan P.	Production of vermicompost by utilizing paddy (Oryza Sativa) straw (pre-digested with Trichoderma Viride) and Eudrilus Eugeniae, Perionyx Excavatus and Lampito Mauritii	2013	International Journal of Pharma and Bio Sciences	4	4		B986	B995			http://www.scopus.com/inward/record.url?eid=2-s2.0-84889066880&partnerID=40&md5=c3ec67b85b8d566bd9eb0986a43dbbda	Centre for Eco-friendly Agro-Technologies (Vermibiotechnology) Research, Department of Zoology, Nehru Memorial College (Autonomous), Puthanampatti-621 007, Tiruchirappalli, Tamil Nadu, India	Viji, J., Centre for Eco-friendly Agro-Technologies (Vermibiotechnology) Research, Department of Zoology, Nehru Memorial College (Autonomous), Puthanampatti-621 007, Tiruchirappalli, Tamil Nadu, India; Neelanarayanan, P., Centre for Eco-friendly Agro-Tech	The paddy straw is one of the most abundant agricultural by-products in Tamil Nadu, India. It contains approximately 37% cellulose, 24% hemicelluloses and 15% lignin. In the present investigation the paddy straw was pre-digested with Trichoderma viride an	Actinomycetes and fungi; Bacteria; Chemical nutrients; Eudrilus eugeniae; Lampito mauritii; Paddy straw; Perionyx excavatus; Trichoderma viride	calcium; magnesium; nitrogen; organic carbon; phosphorus; potassium; sodium; sulfur; Actinobacteria; article; bacterium; biotransformation; controlled study; earthworm; electric conductivity; Eudrilus eugeniae; fungus; Lampito mauritii; moisture; monocult		calcium, 14092-94-5, 7440-70-2; magnesium, 7439-95-4; nitrogen, 7727-37-9; phosphorus, 7723-14-0; potassium, 7440-09-7; sodium, 7440-23-5; sulfur, 13981-57-2, 7704-34-9				Ministry of Agriculture, Ministry of External Affairs (2010), http://www.indiabusiness.nic.in/economy/agriculture.html, Anonymous. Government of IndiaMaiorella, B.L., Ethanol fermentation (1985) Comprehensive biotechnol, 3, pp. 861-914. , Young, M. (ed.).	Viji, J.; Centre for Eco-friendly Agro-Technologies (Vermibiotechnology) Research, Department of Zoology, Nehru Memorial College (Autonomous), Puthanampatti-621 007, Tiruchirappalli, Tamil Nadu, India								9756299					English	Intl. J. Pharma Bio Sci.	Article	Scopus	nitrogen
Ibrahim M., Peng S.-B., Tang Q.-Y., Huang M., Jiang P., Zou Y.-B.	Comparisons of Yield and Growth Behaviors of Hybrid Rice Under Different Nitrogen Management Methods in Tropical and Subtropical Environments	2013	Journal of Integrative Agriculture	12	4		621	629			http://www.scopus.com/inward/record.url?eid=2-s2.0-84875925540&partnerID=40&md5=f8ba955405140918df959f96b466e160	College of Agronomy, Hunan Agricultural University, Changsha 410128, China; Crop Physiology and Production Center (CPPC), Huazhong Agricultural University, Wuhan 430070, China	Ibrahim, M., College of Agronomy, Hunan Agricultural University, Changsha 410128, China; Peng, S.-B., Crop Physiology and Production Center (CPPC), Huazhong Agricultural University, Wuhan 430070, China; Tang, Q.-Y., College of Agronomy, Hunan Agricultural	To compare the grain yield and growth behaviors of hybrid rice, field experiments were conducted in a subtropical environment in Changsha, Hunan Province, China, and in two tropical environments in Gazipur and Habiganj in Bangladesh during 2009 to 2011. T	Biomass production; Crop growth rate; Hybrid rice; Leaf area duration; Leaf area index; Real-time nitrogen management							Akita, S., Respiration: variation and potential for manipulation (1993) International Crop Sicnece I, pp. 799-805. , Crop Science Society of America, Madison, Wisconsin, USA, D.R. Buxton, R. Shibles, R.A. Forsberg, B.L. Blad, K.H. Asay, G.M. Paulsen, R.F.	Zou, Y.-B.; College of Agronomy, Hunan Agricultural University, Changsha 410128, China; email: ybzou123@126.com								20953119			10.1016/S2095-3119(13)60280-4		English	J. Integr. Agric.	Article	Scopus	nitrogen
Pooniya V., Shivay Y.S.	ENRICHMENT OF BASMATI RICE GRAIN AND STRAW WITH ZINC AND NITROGEN THROUGH FERTI-FORTIFICATION AND SUMMER GREEN MANURING UNDER INDO-GANGETIC PLAINS OF INDIA	2013	Journal of Plant Nutrition	36	1		91	117			http://www.scopus.com/inward/record.url?eid=2-s2.0-84870885242&partnerID=40&md5=b803ef961b98e7f3ea40c6444c2d4480	Division of Agronomy, Indian Agricultural Research Institute, New Delhi 110 012, India	Pooniya, V., Division of Agronomy, Indian Agricultural Research Institute, New Delhi 110 012, India; Shivay, Y.S., Division of Agronomy, Indian Agricultural Research Institute, New Delhi 110 012, India	Zinc (Zn) deficiency is a well-identified problem in cereals, resulting in decreased crop yields and nutritional quality. Approximately half of the world's population suffers from Zn deficiency. Cereal crops play an important role in satisfying daily calo	basmati rice; ferti-fortification; N and Zn use-indices; nutrient concentrations and uptake; summer green manuring; Zn fertilization	Sesbania; Sesbania bispinosa; Vigna radiata; Vigna radiata var. radiata						Alloway, B.J., (2008) Zinc in Soils and Crop Nutrition, , Brussels, Brussels,: International Zinc Association and International Fertiliser Industry Association; Cakmak, I., Role of zinc in protecting plant cells from reactive oxygen species (2000) New Phy	Shivay, Y. S.; Division of Agronomy, Indian Agricultural Research Institute, New Delhi 110 012, India; email: ysshivay@hotmail.com								1904167		JPNUD	10.1080/01904167.2012.733052		English	J. Plant Nutr.	Article	Scopus	nitrogen
Jalota S.K., Kaur H., Kaur S., Vashisht B.B.	Impact of climate change scenarios on yield, water and nitrogen-balance and -use efficiency of rice-wheat cropping system	2013	Agricultural Water Management	116			29	38		1	http://www.scopus.com/inward/record.url?eid=2-s2.0-84870261813&partnerID=40&md5=d5b7a9b0e29c36231807e1c4c03f5fb5	Punjab Agricultural University Ludhiana, ICAR, Department of Soil Science, 141004 Ludhiana, India; Department of Soil Science, Punjab Agricultural University, 141004 Ludhiana, India; Department of Soil and Water Engineering, Ludhiana, 141004, India; Depar	Jalota, S.K., Punjab Agricultural University Ludhiana, ICAR, Department of Soil Science, 141004 Ludhiana, India; Kaur, H., Department of Soil Science, Punjab Agricultural University, 141004 Ludhiana, India; Kaur, S., Department of Soil and Water Engineeri	The study focuses on (i) obtaining PRECIS climate change scenario (A1B) data for Ludhiana location and minimizing its bias, (ii) simulation of its impact on crop yield, crop duration, water and nitrogen-balance and -use efficiency of rice-wheat cropping s	Bias; Climate change scenario; Correction functions; Rice-wheat cropping system; Yield reduction	Bias; Climate change scenarios; Correction function; Rice-wheat cropping systems; Yield reduction; Computer simulation; Crops; Efficiency; Irrigation; Nitrogen; Water supply; Climate change; agricultural modeling; agrometeorology; climate change; climate						Aulakh, M.S., Khera, T.S., Doren, J.W., Singh, K., Singh, B., Yield and N dynamics in a rice-wheat system using green manure and inorganic fertilizer (1997) Soil Science Society of America Journal, 64, pp. 1867-1876; Baker, J.T., Allen, L.H., Broote, K.J.	Jalota, S.K.; Punjab Agricultural University Ludhiana, ICAR, Department of Soil Science, 141004 Ludhiana, India; email: jalotask03@yahoo.com								3783774		AWMAD	10.1016/j.agwat.2012.10.010		English	Agric. Water Manage.	Article	Scopus	Nitrogen supply, climate, nitrogen
Choudhury B.U., Singh A.K.	Bed planted rice-wheat rotation at differential soil moisture regimes on soil hydro-physical properties, root growth, nitrogen uptake, and system productivity	2013	Paddy and Water Environment	11	2014-01-04		265	275		1	http://www.scopus.com/inward/record.url?eid=2-s2.0-84871719723&partnerID=40&md5=b2eb32794d06a1193554f9de1f0373d4	Division of Soil Science, I.C.A.R. Research Complex for NEH Region, Umiam, 793103 Meghalaya, India; I.C.A.R., Krishi Anusandhan Bhawan II, Pusa Campus, New Delhi, 110012, India	Choudhury, B.U., Division of Soil Science, I.C.A.R. Research Complex for NEH Region, Umiam, 793103 Meghalaya, India; Singh, A.K., I.C.A.R., Krishi Anusandhan Bhawan II, Pusa Campus, New Delhi, 110012, India	Along with most widely practiced resources conserving technology zero-tillage wheat after rice, adoption of permanent beds for rice-wheat rotation is also gaining popularity. Since relatively a new approach particularly for dry-seeded rice and permanent b	Nitrogen uptake; Permanent beds; Resource conserving technology; Rice-wheat rotation; System productivity	Nitrogen uptake; Permanent beds; Resource conserving; Rice-wheat rotations; System productivity; Agriculture; Floods; Nitrogen; Physical properties; Rotation; Soil moisture; Productivity; Triticum aestivum						Acharya, C.L., Sood, M.C., Effect of tillage methods on soil physical properties and water expense of rice on an acidic alfisols (1992) J Indian Soc Soil Sci, 40, pp. 409-414; Balasubramanian, V., Ladha, J.K., Gupta, R., Naresh, R.K., Mehla, R.K., Bijay-S	Choudhury, B. U.; Division of Soil Science, I.C.A.R. Research Complex for NEH Region, Umiam, 793103 Meghalaya, India; email: burhan3i@yahoo.com								16112490			10.1007/s10333-012-0316-4		English	Paddy Water Environ.	Article	Scopus	nitrogen, flood, rotation
Kumar M., Das A., Ramkrushna G.I., Patel D.P., Munda G.C., Naropongla N., Buragohain J.	Effect of nutrient sources and transplanting date on aromatic rice (Oryza sativa) under mid hills of north eastern india	2013	Indian Journal of Agronomy	58	3		322	326			http://www.scopus.com/inward/record.url?eid=2-s2.0-84884873467&partnerID=40&md5=0dc8636f90c619423e1025dc9c3150f1	ICAR Research Complex for NEH Region, Umiam, Meghalaya, 793 103, India; SMS (Agronomy), KVK, ICAR Research Complex for NEH Region, Longleng, Nagaland, India; Plant Physiology, National Institute of Abiotic Stress Management, Baramati, India; Division of N	Kumar, M., ICAR Research Complex for NEH Region, Umiam, Meghalaya, 793 103, India, SMS (Agronomy), KVK, ICAR Research Complex for NEH Region, Longleng, Nagaland, India; Das, A., ICAR Research Complex for NEH Region, Umiam, Meghalaya, 793 103, India; Ramkr	A field experiment was conducted during kharif seasons of 2009 and 2010 to find out the effect of dates of transplanting and nutrient sources on productivity, nutrient uptake and economics of aromatic rice (Oryza sativa L.) in lowland condition. The resul	Aromatic rice; Nitrogen use efficiency; Nutrient management; Productivity; Soil health; Transplanting date							Bruns, H.A., Abbas, H.K., Planting date effect on Bt and non-Bt corn in the mid-south USA (2006) Agronomy Journal, 98, pp. 100-106; Das, T., Sinha, A.C., Effect of organic materials and levels of nitrogen on yield attributes and yield of rice (Oryza sativ	Ramkrushna, G. I.; ICAR Research Complex for NEH Region, Umiam, Meghalaya, 793 103, India; email: rgidu@yahoo.co.in								0537197X		IJAGA			English	Indian J. Agron.	Article	Scopus	nitrogen, planting
Polizzotto M.L., Lineberger E.M., Matteson A.R., Neumann R.B., Badruzzaman A.B.M., Ashraf Ali M.	Arsenic transport in irrigation water across rice-field soils in Bangladesh	2013	Environmental Pollution	179			210	217		1	http://www.scopus.com/inward/record.url?eid=2-s2.0-84877951789&partnerID=40&md5=a9a589eaf73553da739c22a61462b5de	Department of Soil Science, North Carolina State University, 101 Derieux St, Raleigh, NC 26795, United States; Department of Civil and Environmental Engineering, University of Washington, 168 Wilcox Hall, Seattle, WA 98195, United States; Department of Ci	Polizzotto, M.L., Department of Soil Science, North Carolina State University, 101 Derieux St, Raleigh, NC 26795, United States; Lineberger, E.M., Department of Soil Science, North Carolina State University, 101 Derieux St, Raleigh, NC 26795, United State	Experiments were conducted to analyze processes impacting arsenic transport in irrigation water flowing over bare rice-field soils in Bangladesh. Dissolved concentrations of As, Fe, P, and Si varied over space and time, according to whether irrigation wat	Arsenic; Bangladesh; Irrigation water; Soil Transport	Arsenic concentration; Bangladesh; Dissolved concentrations; Irrigation waters; Laboratory experiments; Soil transports; Spatial variability; Static conditions; Arsenic; Experiments; Flowing wells; Inlet flow; Irrigation; Soils; Water levels; Water supply		arsenic, 7440-38-2; iron, 14093-02-8, 53858-86-9, 7439-89-6; phosphorus, 7723-14-0; Arsenic, 7440-38-2; Soil; Soil Pollutants; Water Pollutants, Chemical				Abedin, J., Cresser, M.S., Meharg, A.A., Feldmann, J., Cotter-Howells, J., Arsenic accumulation and metabolism in rice (Oryza sativa L.) (2002) Environmental Science and Technology, 36 (5), pp. 962-968. , DOI 10.1021/es0101678; Appelo, C.A.J., Van Der Wei	Polizzotto, M.L.; Department of Soil Science, North Carolina State University, 101 Derieux St, Raleigh, NC 26795, United States; email: matt_polizzotto@ncsu.edu								2697491		ENPOE	10.1016/j.envpol.2013.04.025	23688733	English	Environ. Pollut.	Article	Scopus	Phosphorus, ecosystems
Islam M.S., Sarkar M.A.R., Alam M.J., Kashem M.A., Rafii M.Y., Latif M.A.	Optimizing of planting density on the growth and yield of aromatic fine rice in rainfed condition	2013	Life Science Journal	10	4	401	3009	3016			http://www.scopus.com/inward/record.url?eid=2-s2.0-84891546750&partnerID=40&md5=58c1c8d08463a1d8e3cdb5707dd08a9d	Bangladesh Institute of Nuclear Agriculture (BINA), BAU Campus, Mymensingh, Bangladesh; Department of Agronomy, Bangladesh Agricultural University, Mymensingh, Bangladesh; Institute of Tropical Agriculture (ITA), Universiti Putra Malaysia, 43400 UPM, Serd	Islam, M.S., Bangladesh Institute of Nuclear Agriculture (BINA), BAU Campus, Mymensingh, Bangladesh, Institute of Tropical Agriculture (ITA), Universiti Putra Malaysia, 43400 UPM, Serdang, Selangor, Malaysia; Sarkar, M.A.R., Department of Agronomy, Bangla	A field experiment was carried out at the Bangladesh Institute of Nuclear Agriculture (BINA) farm, Mymensingh, Bangladesh during July to December, 2010, in view to find out the optimum plant spacing for the highest yield of aromatic fine rice grown in rai	Aromatic fine rice and yield; Spacing							Amir, P., Quyyum, A., Akhtar, M.R., Economically optimum plant density at different levels of fertilizer used for irrigated rice in punjab (1984) Pakistan J. Agril. Res., 5 (2), pp. 71-77; (2005) Fertilizer Recommendation Guide, p. 117. , BARC, Bangladesh	Latif, M. A.; Department of Crop Science, Agriculture, Universiti Putra Malaysia, 43400 UPM, Serdang, Selangor, Malaysia; email: alatif1965@yahoo.com								10978135					English	Life Sci. J.	Article	Scopus	Planting
Kumar V., Kumar P., Singh K., Singh R.	Water use efficiency in rice-wheat cropping sequence on raised bed planting system	2013	Annals of Agri Bio Research	18	1		32	34			http://www.scopus.com/inward/record.url?eid=2-s2.0-84869420853&partnerID=40&md5=977f8388a3febb105652826f3e027d98	Department of Agronomy, CCS Haryana Agricultural University, Hisar-125 004 (Haryana), India	Kumar, V., Department of Agronomy, CCS Haryana Agricultural University, Hisar-125 004 (Haryana), India; Kumar, P., Department of Agronomy, CCS Haryana Agricultural University, Hisar-125 004 (Haryana), India; Singh, K., Department of Agronomy, CCS Haryana	The tremendous change in ecology due to rise of global temperature has disturbed the precipitation phenomenon. This has resulted in depletion of surface irrigation resources in India. In view of the above, a field experiment was conducted in sequence duri	Raised bed planting; Rice-wheat sequence; Water use efficiency	Triticum aestivum						Goel, A.C., Verma, K.S., Effect of different water regimes in transplanted paddy (1988) Agric. Sci. Digest, , June, 1988; Kumar, V., Kumar, D., Kumar, P., Declining water table scenario in Haryana-A review (2007) Water and Energy Int. J., 64, pp. 32-34; S	Kumar, V.; Department of Agronomy, CCS Haryana Agricultural University, Hisar-125 004 (Haryana), India								9719660					English	Ann. Agri Bio Res.	Article	Scopus	Planting
Kumar V., Kumar P., Singh R., Kumar D., Singh K.	Effect of raised bed planting system on nutrient uptake and yield in ricewheat cropping sequence	2013	Annals of Biology	29	1		53	55			http://www.scopus.com/inward/record.url?eid=2-s2.0-84869171015&partnerID=40&md5=8d2c9c7c94d850c74f70c03aa76dae00	CCSHAU Rice Research Station, Kaul, Kaithal (Haryana), India; Department of Agriculture, Haryana, India	Kumar, V., CCSHAU Rice Research Station, Kaul, Kaithal (Haryana), India; Kumar, P., CCSHAU Rice Research Station, Kaul, Kaithal (Haryana), India; Singh, R., CCSHAU Rice Research Station, Kaul, Kaithal (Haryana), India; Kumar, D., CCSHAU Rice Research Stat	Field experiment was conducted in sequence during rabi (wheat) and kharif (rice) seasons which commenced in 2004 and continued for three years at two sites in Kamal, having well drained soil and poorly drained soil conditions. The treatment consisted of s	Bed planting; Nutrient uptake; Rice-wheat cropping; Water use efficiency; Yield	agricultural land; crop yield; cropping practice; nutrient uptake; rice; sowing; spatiotemporal analysis; transplantation; tree planting; water use efficiency; wheat; India; Karnal; Punjab [India]; Triticum aestivum						Hobbs, P.R., Gupta, R.K., Rice-wheat cropping system in the Indo-Gangetic plains: Issues of water productivity in relation to new resources conserving technologies (2003) Water Productivity in Agriculture: Limits and Opportunities for Improvement, pp. 239	Kumar, V.; CCSHAU Rice Research Station, Kaul, Kaithal (Haryana), India								9700153		ANBIE			English	Ann. Biol.	Article	Scopus	Planting
Maqsood M., Shehzad M.A., Azam Ali S.N., Iqbal M.	Rice cultures and nitrogen rate effects on yield and quality of rice (Oryza sativa L.)	2013	Turkish Journal of Agriculture and Forestry	37	6		665	673			http://www.scopus.com/inward/record.url?eid=2-s2.0-84884360562&partnerID=40&md5=c77c1e682130e384afe0052cfd21c8a8	Department of Agronomy, University of Agriculture, Faisalabad, Pakistan; School of Biosciences, Division of Agricultural and Environmental Sciences, University of Nottingham, United Kingdom; Department of Chemistry and Biochemistry, University of Agricult	Maqsood, M., Department of Agronomy, University of Agriculture, Faisalabad, Pakistan; Shehzad, M.A., Department of Agronomy, University of Agriculture, Faisalabad, Pakistan; Azam Ali, S.N., School of Biosciences, Division of Agricultural and Environmental	Field studies in 2010 and 2011 were conducted to evaluate the effect of variable nitrogen rates (0-100 kg N ha-1) and culture methods (transplanted and direct) on chlorophyll contents, yield, grain quality, and economics in rice crop (Oryza sativa L. 'Bas	Amylose content; Nitrogen application; Oryza sativa L; Planting methods; Quality; Rice culture; Yield	Amylose content; Chlorophyll contents; Climatic conditions; Oryza sativa L; Planting methods; Rice (Oryza sativa L.); Transplanted plants; Yield; Crops; Economics; Grain (agricultural product); Image quality; Plants (botany); Nitrogen; climate conditions;						Ahmad, S., Zia-ul-Haq, M., Ali, H., Ahmad, A., Khan, M., Khaliq, T., Husnain, Z., Hoogenboom, G., Morphological and quality parameters of Oryza Sativa L. as affected by population dynamics, nitrogen fertilization and irrigation regimes (2009) Pak J Bot, 4	Shehzad, M. A.; Department of Agronomy, University of Agriculture, Faisalabad, Pakistan; email: asifbukhari01@gmail.com								1300011X			10.3906/tar-1203-5		English	Turk. J. Agric. For.	Article	Scopus	Planting, nitrogen
Sudha V., Spiegelman D., Hong B., Malik V., Jones C., Wedick N.M., Hu F.B., Willett W., Bai M.R., Ponnalagu M.M., Arumugam K., Mohan V.	Consumer Acceptance and Preference Study (CAPS) on brown and undermilled Indian rice varieties in Chennai, India.	2013	Journal of the American College of Nutrition	32	1		50	57			http://www.scopus.com/inward/record.url?eid=2-s2.0-84893372993&partnerID=40&md5=9f54b8514df961a3138c6b61e3f9b455	Madras Diabetes Research Foundation, Dr Mohan's Diabetes Specialities Centre, WHO Collaborating Centre for Non-Communicable Diseases and International Diabetes Federation (IDF) Centre of Education, Gopalapuram, Chennai, India.	Sudha, V., Madras Diabetes Research Foundation, Dr Mohan's Diabetes Specialities Centre, WHO Collaborating Centre for Non-Communicable Diseases and International Diabetes Federation (IDF) Centre of Education, Gopalapuram, Chennai, India.; Spiegelman, D.;	To study consumer acceptance of unmilled brown and undermilled rice among urban south Indians. Overweight and normal weight adults living in slum and nonslum residences in Chennai participated (n = 82). Bapatla (BPT) and Uma (red pigmented) rice varieties		adult; article; classification; consumer; cooking; female; food handling; food quality; human; India; male; nutritional value; obesity; plant seed; poverty; reference value; rice; species difference; taste; urban population; Adult; Consumer Satisfaction;							Sudha, V.								15411087				24015699	English	J Am Coll Nutr	Article	Scopus	Seed quality
Singh Y.V., Singh K.K., Sharma S.K.	Influence of Crop Nutrition on Grain Yield, Seed Quality and Water Productivity under Two Rice Cultivation Systems	2013	Rice Science	20	2		129	138			http://www.scopus.com/inward/record.url?eid=2-s2.0-84876031588&partnerID=40&md5=0a4f4c49d80d57a2daf1371935f459bb	Centre for Conservation and Utilization of Blue Green Algae, Indian Agricultural Research Institute, New Delhi-110012, India; Seed Production Unit, Indian Agricultural Research Institute, New Delhi-110012, India	Singh, Y.V., Centre for Conservation and Utilization of Blue Green Algae, Indian Agricultural Research Institute, New Delhi-110012, India; Singh, K.K., Seed Production Unit, Indian Agricultural Research Institute, New Delhi-110012, India; Sharma, S.K., Se	The system of rice intensification (SRI) is reported to have advantages like lower seed requirement, less pest attack, shorter crop duration, higher water use efficiency and the ability to withstand higher degree of moisture stress than traditional method	Crop nutrition; Grain yield; Rice; Seed quality; System of rice intensification; Water productivity	Azolla; Chlorophyta; Embryophyta; Pusa; Tracheophyta						Abdulbaki, A.A., Anderson, J.D., Vigour determination in soybean seed by multiple criteria (1973) Crop Sci, 13, pp. 630-633; Africare, Oxfarm America, WWF-ICRISAT (2010) More Rice for People, More Water for Planet: System of Rice Intensification (SRI), ,	Singh, Y.V.; Centre for Conservation and Utilization of Blue Green Algae, Indian Agricultural Research Institute, New Delhi-110012, India; email: yvsingh63@yahoo.co.in								16726308			10.1016/S1672-6308(13)60113-4		English	Rice Sci.	Article	Scopus	Seed quality
Singh U.S., Dar M.H., Singh S., Zaidi N.W., Bari M.A., Mackill D.J., Collard B.C.Y., Singh V.N., Singh J.P., Reddy J.N., Singh R.K., Ismail A.M.	Field performance, dissemination, impact and tracking of submergence tolerant (Sub1) rice varieties in South Asia	2013	Sabrao Journal of Breeding and Genetics	45	1		112	131		6	http://www.scopus.com/inward/record.url?eid=2-s2.0-84875748979&partnerID=40&md5=d595020eb7371daef48819a354cd0a9f	International Rice Research Institute (IRRI) Office, New Delhi, India; International Rice Research Institute (IRRI) Office, Dhaka, Bangladesh; International Rice Research Institute (IRRI), Los Baños, Philippines; University of California, Davis, United St	Singh, U.S., International Rice Research Institute (IRRI) Office, New Delhi, India; Dar, M.H., International Rice Research Institute (IRRI) Office, New Delhi, India; Singh, S., International Rice Research Institute (IRRI) Office, New Delhi, India; Zaidi,	Flash flooding is one of the most important yield limiting factors of rice in South Asia, particularly in eastern India and Bangladesh. Productivity of flood-prone areas is not only low but also unstable. Swarna is the most popular variety of India and Ba	Farmer adoption; Seed multiplication; Sub1 varieties; Variety release	Melinda						Bailey-Serres, J., Fukao, T., Ronald, P.C., Ismail, A., Heuer, S., Mackill, D.J., Submergence tolerant rice: SUB1's journey from landrace to modern cultivar (2010) Rice, 3, pp. 138-147; Catling, D., (1992) Rice in Deep Water, p. 542. , International Rice	Singh, U. S.; International Rice Research Institute (IRRI) Office, New Delhi, India; email: u.singh@irri.org								10297073					English	Sabrao J. Breed. Genet.	Article	Scopus	Seed variety
Tomar J.M.S., Das A., Arunachalam A.	Crop response and soil fertility as influenced by green leaves of indigenous agroforestry tree species in a lowland rice system in northeast India	2013	Agroforestry Systems	87	1		193	201			http://www.scopus.com/inward/record.url?eid=2-s2.0-84873252740&partnerID=40&md5=7544aade850b2ea61e09b57c7a817f74	Central Soil and Water Conservation Research and Training Institute, Dehradun, 248195 Uttarakhand, India; ICAR Research Complex for NEH Region, Umiam, 793103 Meghalaya, India; Division of Natural Resource Management, Indian Council of Agricultural Researc	Tomar, J.M.S., Central Soil and Water Conservation Research and Training Institute, Dehradun, 248195 Uttarakhand, India; Das, A., ICAR Research Complex for NEH Region, Umiam, 793103 Meghalaya, India; Arunachalam, A., ICAR Research Complex for NEH Region,	Field experiments were conducted during rainy seasons of three consecutive years (2008-2010) to study the effect of green leaf manuring on dry matter partitioning and productivity of lowland rice (Oryza sativa L.). Green leaves of five indigenous agrofore	Agroforestry trees; Green leaf manure; Nutrient uptake; Rice; Soil fertility	agricultural management; agroforestry; crop performance; crop yield; experimental study; field method; harvesting; leaf; lowland environment; manure; plant residue; rice; seasonality; soil fertility; soil organic matter; species diversity; species occurre						Abdullah, M.R., Hossain, K.L., Effects of urea-N fertilizer dosage supplemented with Ipil-Ipil tree litter on yield of rice and insect prevalence (2006) J For Res, 17, pp. 335-338; Anup, D., Hazarika, U.K., Munda, G.C., Patel, D.P., Kumar, R., Tomar, J.M.	Arunachalam, A.; Division of Natural Resource Management, Indian Council of Agricultural Research, Krishi Anusandhan Bhawan, Pusa, New Delhi, 110012, India; email: arun70@gmail.com								1674366		AGSYE	10.1007/s10457-012-9535-3		English	Agrofor. Syst.	Article	Scopus	soil fertility
Rahman M.H., Islam M.R., Jahiruddin M., Rafii M.Y., Hanafi M.M., Malek M.A.	Integrated nutrient management in maize-legume-rice cropping pattern and its impact on soil fertility	2013	Journal of Food, Agriculture and Environment	11	1		648	652			http://www.scopus.com/inward/record.url?eid=2-s2.0-84874527219&partnerID=40&md5=fe49ddd4ca03de9290a77f08c470e3be	Soil Science Division, Bangladesh Institute of Nuclear Agriculture, Mymensingh-2202, Bangladesh; Department of Soil Science, Bangladesh Agricultural University, Mymensingh-2202, Bangladesh; Institute of Tropical Agriculture, Universiti Putra Malaysia, 434	Rahman, M.H., Soil Science Division, Bangladesh Institute of Nuclear Agriculture, Mymensingh-2202, Bangladesh; Islam, M.R., Department of Soil Science, Bangladesh Agricultural University, Mymensingh-2202, Bangladesh; Jahiruddin, M., Department of Soil Sci	Improved soil fertility is a precondition for increased crop production. Soil organic matter is a key factor in maintaining long-term soil fertility since it is the reservoir of metabolic energy, which drives soil biological processes involved in nutrient	Inorganic fertilizer; IPNS; Organic manure; Soil fertility; Yield	boron; nitrogen fertilizer; phosphorus; potassium; sulfur; zinc; article; biomass; controlled study; crop production; fallow; grain yield; legume; maize; manure; mung bean; nonhuman; nutrient concentration; nutrient management; nutrient status; plant nutr		boron, 7440-42-8; phosphorus, 7723-14-0; potassium, 7440-09-7; sulfur, 13981-57-2, 7704-34-9; zinc, 14378-32-6, 7440-66-6				Brown, L.R., Renner, M., Flavin, C., Vital Signs (1997) The Environmental Trends That Are Shaping our Future, , Worldwatch Institute. W. W. Norton and Company, Inc., New York. OpenURL; Gilland, B., Cereal, nitrogen and population: An assessment of the glo	Rafii, M. Y.; Institute of Tropical Agriculture, Universiti Putra Malaysia, 43400 UPM Serdang, Selangor, Malaysia; email: mrafii@putra.upm.edu.my								14590255					English	J. Food Agric. Environ.	Article	Scopus	soil fertility, fertilizer, phosphorus, nitrogen
Shrestha N., Raes D., Vanuytrecht E., Sah S.K.	Cereal yield stabilization in Terai (Nepal) by water and soil fertility management modeling	2013	Agricultural Water Management	122			53	62		1	http://www.scopus.com/inward/record.url?eid=2-s2.0-84875761620&partnerID=40&md5=b2c93613383babc8c175eeb9fb028633	Department of Earth and Environmental Sciences, Division Soil and Water Management, Katholieke Universiteit Leuven, Celestijnenlaan 200E, BE-3001 Heverlee, Belgium; Department of Agronomy, Institute of Agriculture and Animal Sciences, Rampur Campus, Rampu	Shrestha, N., Department of Earth and Environmental Sciences, Division Soil and Water Management, Katholieke Universiteit Leuven, Celestijnenlaan 200E, BE-3001 Heverlee, Belgium; Raes, D., Department of Earth and Environmental Sciences, Division Soil and	Rice (Oryza sativa L.), maize (Zea mays L.) and wheat (Triticum aestivum L.) are the major cereals cultivated in the Terai region of Nepal. In the region, agriculture is mainly rainfed and fertilizer applications are low. In this study, water and soil fer	AquaCrop model; Maize; Rice; Terai Nepal; Wheat; Yield stabilization	Coefficient of determination; Maize; Model calibration and validation; Rice; Terai Nepal; Water management strategies; Wheat; Wheat (Triticum aestivum L.); Crops; Grain (agricultural product); Irrigation; Rain; Stabilization; Water management; Fertilizers						Abedinpour, M., Sarangi, A., Rajput, T.B.S., Singh, M., Pathak, H., Ahmad, T., Performance evaluation of AquaCrop model for maize crop in a semi-arid environment (2012) Agricultural Water Management, 110, pp. 55-66; Abrha, B., Delbecque, N., Raes, D., Tse	Shrestha, N.; Department of Earth and Environmental Sciences, Division Soil and Water Management, Katholieke Universiteit Leuven, Celestijnenlaan 200E, BE-3001 Heverlee, Belgium; email: nirman.shrestha@gmail.com								3783774		AWMAD	10.1016/j.agwat.2013.03.003		English	Agric. Water Manage.	Article	Scopus	soil fertility, fertilizer, water, water management
Gopalan C.	The changing nutrition scenario	2013	Indian Journal of Medical Research	138	SEP		392	397			http://www.scopus.com/inward/record.url?eid=2-s2.0-84885051717&partnerID=40&md5=fe5f43d9976b8f730e0f5e73b78f7f45	Nutrition Foundation of India, New Delhi, India	Gopalan, C., Nutrition Foundation of India, New Delhi, India	The past seven decades have seen remarkable shifts in the nutritional scenario in India. Even up to the 1950s severe forms of malnutrition such as kwashiorkar and pellagra were endemic. As nutritionists were finding home-grown and common-sense solutions f	Dual nutrition burden; Green revolution; Micronutrients; Nutrition; Supplementation	ascorbic acid; folic acid; iodine; iron; magnesium; nicotinic acid; retinol; selenium; trace element; vitamin D; zinc; article; beriberi; food industry; food insecurity; food quality; government; grain; health care; human; hunger; India; infant mortality;		ascorbic acid, 134-03-2, 15421-15-5, 50-81-7; folic acid, 59-30-3, 6484-89-5; iodine, 7553-56-2; iron, 14093-02-8, 53858-86-9, 7439-89-6; magnesium, 7439-95-4; nicotinic acid, 54-86-4, 59-67-6; retinol, 68-26-8, 82445-97-4; selenium, 7782-49-2; zinc, 1437				Gopalan, C., The changing epidemiology of malnutrition in a developing society; the effect of unforeseen factors (1999) NFI Bull, 20, pp. 1-5; Gopalan, C., Ramanathan, M.K., Effect of different cereals on blood sugar levels (1957) Indian J Med Res, 45, pp	Gopalan, C.; Nutrition Foundation of India, C-13, Qutab Institutional Area, New Delhi 110 016, India; email: nutritionfoundationofindia@gmail.com								9715916		IMIRE			English	Indian J. Med. Res.	Article	Scopus	soil fertility, micronutrients, soil fertility
Swarnalakshmi K., Dhar D.W., Senthil Kumar M., Singh P.K.	Comparative performance of cyanobacterial strains on soil fertility and plant growth parameters in rice	2013	Vegetos	26	2		227	236			http://www.scopus.com/inward/record.url?eid=2-s2.0-84892143648&partnerID=40&md5=2bb4b7ec5e9a45399e2d721fa61053ae	Division of Microbiology, Indian Agricultural Research Institute, New Delhi - 110012, India; Division of Crop Physiology, Biochemistry and Microbiology, Indian Institute of Pulses Research, Kanpur- 208024, India; Department of Botany, Banaras Hindu Univer	Swarnalakshmi, K., Division of Microbiology, Indian Agricultural Research Institute, New Delhi - 110012, India; Dhar, D.W., Division of Microbiology, Indian Agricultural Research Institute, New Delhi - 110012, India; Senthil Kumar, M., Division of Crop Ph	The diazotrophic cyanobacterial consortium consists of Anabaena variabilis, Aulosira fertilissima, Nostoc muscorum and Tolypothrix tenuis are widely used to supplement chemical N fertilizers for flooded rice cultivation in India. Our present study was und	Available nitrogen; Cyanobacteria; Microbial biomass; Organic carbon; Rice; Soil health							Acea, M.J., Prieto Fernandez, A., Diz Cid, N., Cyanobacterial inoculation of heated soils: Effect on microorganisms of C and N cycles and on chemical composition in soil surface (2003) Soil Biol Biochem, 35, pp. 513-524; Albiac, R., Canet, R., Pomares, F.	Dhar, D. W.; Division of Microbiology, Indian Agricultural Research Institute, New Delhi - 110012, India; email: dollywattaldhar@yahoo.com								9704078					English	Vegetos	Article	Scopus	soil fertility, nitrogen
Patil M.D., Das B.S.	Assessing the effect of puddling on preferential flow processes through under bund area of lowland rice field	2013	Soil and Tillage Research	134			61	71		1	http://www.scopus.com/inward/record.url?eid=2-s2.0-84881486139&partnerID=40&md5=7d18d5be9583731a8f06708dbab1971a	Agricultural and Food Engineering Department, Indian Institute of Technology, Kharagpur 721302, India	Patil, M.D., Agricultural and Food Engineering Department, Indian Institute of Technology, Kharagpur 721302, India; Das, B.S., Agricultural and Food Engineering Department, Indian Institute of Technology, Kharagpur 721302, India	High water losses from rice fields and continued detection of nitrates in groundwater in rice growing areas are two important challenges of sustainable rice production. Recent studies have shown that preferential flow paths present in under-bund soils is	Bund plugging; Dual-continuum model; Lowland rice; Method of moments; Nitrogen transport; Preferential flow	Bund plugging; Dual-permeability models; Experimental assessment; Lowland rice; Model parameterization; Nitrogen transport; Preferential flows; Sustainable rice production; Agricultural machinery; Continuum mechanics; Groundwater; Groundwater flow; Metabo						Abbasi, F., Simunek, J., Feyen, J., van Genuchten, M.T., Shouse, P.J., Simultaneous inverse estimation of soil hydraulic and solute transport parameters from transient field experiments: homogeneous soil (2003) Transactions of the ASAE, 46 (4), pp. 1085-1	Patil, M.D.; International Crops Research Inst. for the Semi-Arid Tropics, Patancheru 502324, India; email: m.patil@cgiar.org								1671987		SOTRD	10.1016/j.still.2013.07.008		English	Soil Tillage Res.	Article	Scopus	Soil structure, sustainability, nitrogen
Mishra M.M., Mohanty M., Gulati J.M.L., Nanda S.S.	Evaluation of various rice (Oryza sativa) based crop sequences for enhanced productivity, profitability and energy efficiency in eastern plateau and hills zone of India	2013	Indian Journal of Agricultural Sciences	83	12		1279	1284			http://www.scopus.com/inward/record.url?eid=2-s2.0-84892391243&partnerID=40&md5=1a3b0343c35745f058e9bb9d0de79e64	Regional Research Station, Odisha University of Agriculture and Technology Chiplima, Sambalpur, Odisha 768 026, India; Odisha University of Agriculture and Technology, Bhubaneswar, Odisha 751 003, India	Mishra, M.M., Regional Research Station, Odisha University of Agriculture and Technology Chiplima, Sambalpur, Odisha 768 026, India; Mohanty, M., Regional Research Station, Odisha University of Agriculture and Technology Chiplima, Sambalpur, Odisha 768 02	A field experiment was conducted consecutively for four years (2004-05 to 2007-08) at Regional Research Station, Chiplima (Sambalpur), Odisha on sandy loam soil with pH 6.0 and organic carbon content of 0.56%. The available N, P and K were 212, 15.7 and 8	Energy productivity; Equivalent yield; Monetary advantage; Nutrient use efficiency; Production efficiency; Rice based crop sequences; Sustainable Yield Index							Ali, A.J., Xu, J.L., Ismail, A.M., Fu, B.Y., Vijaykumar, C.H.M., Gao, Y.M., Domingo, J., Li, Z.K., Hidden diversity for abiotic and biotic stress tolerances in the primary gene pool of rice revealed by a large backcross breeding program (2006) Field Crops	Regional Research Station, Odisha University of Agriculture and Technology Chiplima, Sambalpur, Odisha 768 026, India								195022		IJASA			English	Indian J. Agric. Sci.	Article	Scopus	Sustainable
Bhuiyan M.R., Rashid M.M., Khan M.A.I., Hoque M., Nessa B., Rafii M.Y., Latif M.A.	Eco-friendly management of seed borne fungi for sustainable crop production	2013	Life Science Journal	10	4		1640	1650			http://www.scopus.com/inward/record.url?eid=2-s2.0-84887984750&partnerID=40&md5=ee7a311115a2295de341af0785699345	Bangladesh Rice Research Institute, Gazipur-1701, Bangladesh; Bangladesh Agricultural Institute Research, Gazipur-170, Bangladesh; Dept. of Crop Science, Universiti Putra Malaysia, 43400 UPM, Serdang, Selangor, Malaysia; Institute of Tropical Agriculture,	Bhuiyan, M.R., Bangladesh Rice Research Institute, Gazipur-1701, Bangladesh; Rashid, M.M., Bangladesh Rice Research Institute, Gazipur-1701, Bangladesh; Khan, M.A.I., Bangladesh Rice Research Institute, Gazipur-1701, Bangladesh; Hoque, M., Bangladesh Agri	A total of seven seed-borne fungi were detected from forty rice (Oryzae sativa) seed samples (cv. BR11 and BRRI dhan28) collected from two upazilas (Narshingdi Sadar and Shibpur) of Narshingdi district in Bangladesh. The identified species were Bipolaris	Management and plant extracts; Rice; Seed borne fungi							Agrawal, D.C., Mortensen, C.N., Mathur, S.B., Seed borne diseases and seed health testing of rice (1990) Phytopathol. Papers, 30, p. 106. , [Rice Abstr. 1990. 13(5):274]; Ahmed, M.F., (2002) Efficacy of Some Fungicides and Plant Extracts Against Bipolaris	Latif, M. A.; Bangladesh Rice Research Institute, Gazipur-1701, Bangladesh; email: alatif1965@yahoo.com								10978135					English	Life Sci. J.	Article	Scopus	Sustainable
Roy R., Chan N.W., Rainis R.	Development of indicators for sustainable rice farming in Bangladesh: A case study with participative multi-stakeholder involvement	2013	World Applied Sciences Journal	22	5		672	682		1	http://www.scopus.com/inward/record.url?eid=2-s2.0-84877794174&partnerID=40&md5=a3ace820c0beaca35c2201f61b980799	Department of Agricultural Extension and Information System, Sher-e-Bangla Agricultural University, Bangladesh; Department of Geography, School of Humanities, Universiti Sains Malaysia, Penang, Malaysia	Roy, R., Department of Agricultural Extension and Information System, Sher-e-Bangla Agricultural University, Bangladesh, Department of Geography, School of Humanities, Universiti Sains Malaysia, Penang, Malaysia; Chan, N.W., Department of Geography, Schoo	Indicators are increasingly recognized as an important decision aid tool to translate sustainability issue from theory into practice. However, indicator development for sustainable community development is rather successful than the agricultural sector du	Bangladesh; Delphi technique; Methodology; Participatory; Sustainable development							Roy, R., Chan, N.W., An assessment of agricultural sustainability indicators in Bangladesh: Review and synthesis (2012) Environmentalist, 32 (1), pp. 99-110; Pintér, L., Bizikova, L., Kutics, K., Vari, A., Developing a system of sustainability indicators	Roy, R.; School of Humanities, Universiti Sains Malaysia (USM), 11800 USM Pulau Pinang, Malaysia								18184952			10.5829/idosi.wasj.2013.22.05.2890		English	World Appl. Sci. J.	Article	Scopus	Sustainable
Mirhaj M., Boit A., Razzak M.A., Wahab M.A.	Yield performance comparison between cultures of rice cum prawn (Macrobrachium rosenbergii) and rice cum fish (Cyprinus carpio, Oreochromis niloticus) in North-Eastern Bangladesh	2013	Aquaculture	392-395			26	33		1	http://www.scopus.com/inward/record.url?eid=2-s2.0-84874397155&partnerID=40&md5=c54633cff6e693f6b6847ef7c6e3bca5	Institute of Animal Production in the Tropics and Subtropics, University of Hohenheim, Fruwirthstrasse 12, 70599 Stuttgart, Germany; Institute of Biochemistry and Biology, University of Potsdam, Am Neuen Palais 10, 14469 Potsdam, Germany; Department of Fi	Mirhaj, M., Institute of Animal Production in the Tropics and Subtropics, University of Hohenheim, Fruwirthstrasse 12, 70599 Stuttgart, Germany; Boit, A., Institute of Biochemistry and Biology, University of Potsdam, Am Neuen Palais 10, 14469 Potsdam, Ger	Integrated and concurrent cultures in rice fields are a promising approach to sustainable farming as the demand for aquacultural and agricultural products continues to grow while land and water resources become increasingly scarce. Prawn farming mainly ta	Macrobrachium rosenbergii; Polyculture; Rice cum prawn culture; Sustainable aquaculture	aquaculture; comparative study; cost-benefit analysis; cyprinid; fishery management; integrated approach; market system; paddy field; polyculture; prawn culture; sustainable development; Bangladesh; Cyprinidae; Cyprinus carpio; Macrobrachium rosenbergii;						Aminot, A., Kérouel, R., Birot, D., A flow injection-fluorometric method for the determination of ammonium in fresh and saline waters with a view to in situ analyses (2001) Water Research, 35 (7), pp. 1777-1785; (1990) Official Methods of Analysis, 2. , A	Mirhaj, M.; Institute of Animal Production in the Tropics and Subtropics, University of Hohenheim, Fruwirthstrasse 12, 70599 Stuttgart, Germany; email: mmirhaj@uni-hohenheim.de								448486		AQCLA	10.1016/j.aquaculture.2013.01.038		English	Aquaculture	Article	Scopus	Sustainable
Ahmed N., Flaherty M.S.	Opportunities and challenges for the development of prawn farming with fish and rice in southeast Bangladesh: Potential for food security and economic growth	2013	Food Security	5	5		637	649			http://www.scopus.com/inward/record.url?eid=2-s2.0-84886693028&partnerID=40&md5=ef056d116a30cbe44f0a579098b381f5	Department of Fisheries Management, Bangladesh Agricultural University, Mymensingh, 2202, Bangladesh; SA Water Centre for Water Management and Reuse, University of South Australia, Adelaide, SA, 5095, Australia; Department of Geography, University of Vict	Ahmed, N., Department of Fisheries Management, Bangladesh Agricultural University, Mymensingh, 2202, Bangladesh, SA Water Centre for Water Management and Reuse, University of South Australia, Adelaide, SA, 5095, Australia; Flaherty, M.S., Department of Ge	Although prawn farming in rice fields is concentrated in the southwest of Bangladesh, the southeast region has been identified as a promising area for prawn culture, owing to favorable resources and agro-climatic conditions. To date, however, relatively f	Economic growth; Fish; Food security; Prawn; Rice; Southeast Bangladesh	export; fish; food security; polyculture; prawn culture; rice; sustainable development; Bangladesh; Cyprinidae; Decapoda (Crustacea)						Ahmed, M., Lorica, M.H., Improving developing country food security through aquaculture development - lessons from Asia (2002) Food Policy, 27, pp. 125-141; Ahmed, N., Linking prawn and shrimp farming towards a green economy in Bangladesh: confronting cli	Ahmed, N.; SA Water Centre for Water Management and Reuse, University of South Australia, Adelaide, SA, 5095, Australia; email: nesar.ahmed@unisa.edu.au								18764517			10.1007/s12571-013-0285-5		English	Food Secur.	Article	Scopus	Sustainable, food security
Gathala M.K., Kumar V., Sharma P.C., Saharawat Y.S., Jat H.S., Singh M., Kumar A., Jat M.L., Humphreys E., Sharma D.K., Sharma S., Ladha J.K.	Optimizing intensive cereal-based cropping systems addressing current and future drivers of agricultural change in the northwestern Indo-Gangetic Plains of India	2013	Agriculture, Ecosystems and Environment	177			5	97		1	http://www.scopus.com/inward/record.url?eid=2-s2.0-84880374275&partnerID=40&md5=4d180e624a2d3506f80860c2741c4fda	International Rice Research Institute-India Office, NASC Complex, Pusa, New Delhi 110012, India; International Maize and Wheat Improvement Center, NASC Complex, Pusa, New Delhi 110012, India; Central Soil Salinity Research Institute, Karnal, Haryana 13200	Gathala, M.K., International Rice Research Institute-India Office, NASC Complex, Pusa, New Delhi 110012, India, International Maize and Wheat Improvement Center, Dhaka Office, Bangladesh; Kumar, V., International Rice Research Institute-India Office, NASC	Increasing scarcity of resources (labour, water, and energy) and cost of production, along with climate variability, are major challenges for the sustainability of rice-wheat system in the northwesten Indo-Gangetic Plains (IGP). We hypothesized that adopt	Best management practices; Conservation agriculture; Cropping system; Indo-Gangetic Plains; Rice; Wheat	agricultural change; agricultural management; best management practice; conservation tillage; cost-benefit analysis; cropping practice; irrigation; maize; optimization; resource scarcity; rice; sustainability; water use; wheat; zero tillage; Gangetic Plai						Balasubramanian, V., Adhya, T.K., Ladha, J.K., Enhancing eco-efficiency in the intensive cereal-based systems of the Indo-Gangetic Plains (2012) Issues in Tropical Agriculture Eco-Efficiency: From Vision to Reality, , CIAT Publication, Cali, CO; Bouyoucos	Ladha, J.K.; International Rice Research Institute-India Office, NASC Complex, Pusa, New Delhi 110012, India; email: j.k.ladha@irri.org								1678809		AEEND	10.1016/j.agee.2013.06.002		English	Agric. Ecosyst. Environ.	Article	Scopus	Water, irrigation cost, water management
Varghese S.K., Buysse J., Frija A., Speelman S., Van Huylenbroeck G.	Are Investments in Groundwater Irrigation Profitable? A Case of Rice Farms from South India	2013	Journal of the American Water Resources Association	49	1		52	66			http://www.scopus.com/inward/record.url?eid=2-s2.0-84873322527&partnerID=40&md5=4556efb7f4f810f1a3b5b55f24afc372	Department of Agricultural Economics, Faculty of Bioscience Engineering, Ghent University, Coupure Links 653, 9000 Gent, Belgium	Varghese, S.K., Department of Agricultural Economics, Faculty of Bioscience Engineering, Ghent University, Coupure Links 653, 9000 Gent, Belgium; Buysse, J., Department of Agricultural Economics, Faculty of Bioscience Engineering, Ghent University, Coupur	Varghese, Shalet Korattukudy, Jeroen Buysse, Aymen Frija, Stijn Speelman, and Guido Van Huylenbroeck, 2012. Are Investments in Groundwater Irrigation Profitable? A Case of Rice Farms from South India. Journal of the American Water Resources Association (J	Groundwater irrigation investments; Groundwater management; India groundwater use; Irrigation; Optimal irrigation costs; Tragedy of the Commons; Wells	Groundwater irrigation; Groundwater management; Groundwater use; Irrigation costs; Tragedy of the commons; Abstracting; Costs; Crops; Economics; Groundwater; Investments; Irrigation; Mathematical programming; Profitability; Wells; Water management; cost-b						Aggarwal, M.R., Narayan, T., Does Inequality Lead to Greater Efficiency in the Use Local Commons? The Role of Strategic Investments in Capacity (2004) Journal of Environmental Economics and Management, 47, pp. 163-182. , doi: 10.1016/S0095-0696(03)00034-2	Varghese, S.K.; Department of Agricultural Economics, Faculty of Bioscience Engineering, Ghent University, Coupure Links 653, 9000 Gent, Belgium; email: shalet.korattukudyvarghese@ugent.be								1093474X		JWRAF	10.1111/j.1752-1688.2012.00690.x		English	J. Am. Water Resour. Assoc.	Article	Scopus	Water, irrigation cost, water management
Ali M.K., Ahmad W., Malhi S.S., Atta B.M., Ghafoor A., Zia M.H.	Potential of Carbon Dioxide Biosequestration of Saline-Sodic Soils during Amelioration under Rice-Wheat Land Use	2013	Communications in Soil Science and Plant Analysis	44	17		2625	2635			http://www.scopus.com/inward/record.url?eid=2-s2.0-84883617368&partnerID=40&md5=e4866ab4ccb4aef9ee824d4f77b33e81	Institute of Soil and Environmental Sciences, University of Agriculture, Faisalabad, Pakistan; Department of Environmental Sciences, Faculty of Agriculture and Environment, The University of Sydney, Sydney, Australia; Agriculture and Agri-Food Canada, P.	Ali, M.K., Institute of Soil and Environmental Sciences, University of Agriculture, Faisalabad, Pakistan; Ahmad, W., Department of Environmental Sciences, Faculty of Agriculture and Environment, The University of Sydney, Sydney, Australia; Malhi, S.S., Ag	Potential for carbon dioxide (CO2) biosequestration was determined during the reclamation of highly saline-sodic soils (Aridisols) after rice (2003) and wheat (2003-2004) crops at two sites in District Faisalabad, Pakistan. Two treatments were assessed: T	Brackish water; CO2 biosequestration; gypsum; irrigation; reclamation; rice-wheat rotation; saline-sodic soil	carbon dioxide; carbon sequestration; gypsum; land use; saline soil; sodic soil; soil depth; soil management; soil quality; soil remediation; Faisalabad; Pakistan; Punjab [Pakistan]						Al-Nabulsi, Y.A., Saline drainage water, irrigation frequency, and crop species effects on some physical properties of soils (2001) Journal of Agronomy and Crop Science, 186, pp. 15-20; Blake, G.R., Hartge, K.H., Bulk and particle density (1986) Methods o	Malhi, S. S.; Agriculture and Agri-Food Canada, P. O. Box 1240, Melfort, SK, S0E 1A0, Canada; email: sukhdev.malhi@agr.gc.ca								103624		CSOSA	10.1080/00103624.2013.811522		English	Commun. Soil Sci. Plant Anal.	Article	Scopus	Water, water management
Varghese S.K., Veettil P.C., Speelman S., Buysse J., Van Huylenbroeck G.	Estimating the causal effect of water scarcity on the groundwater use efficiency of rice farming in South India	2013	Ecological Economics	86			55	64		1	http://www.scopus.com/inward/record.url?eid=2-s2.0-84875250841&partnerID=40&md5=340c46a62c7ef2478c34fbd8a32ab7dc	Department of Agricultural Economics, Gent University, Coupure Links 653, 9000 Gent, Belgium	Varghese, S.K., Department of Agricultural Economics, Gent University, Coupure Links 653, 9000 Gent, Belgium; Veettil, P.C., Department of Agricultural Economics, Gent University, Coupure Links 653, 9000 Gent, Belgium; Speelman, S., Department of Agricult	There is no consensus among researchers on the influence of scarcity on common pool resource use: some suggest that scarcity leads to prudent use, whereas others suggest that it will cause over-extraction of resources. This issue is particularly of intere	Causal inference; Common property resource; Groundwater use efficiency; Irrigation; Scarcity; South India	common property resource; consumption behavior; developing world; groundwater resource; irrigation; paddy farming; policy approach; resource scarcity; water demand; water management; water use efficiency; India						Anantha, K.H., Raju, K.V., Groundwater depletion and coping strategies of farming communities in southern peninsular India (2010) Asia-Pacific Development Journal, 17 (2), pp. 119-144; Arnold, J.E.M., (1998) Managing Forests as Common Property, Forestry P	Varghese, S.K.Coupure Links 653, 9000 Gent, Belgium; email: Shalet.KorattukudyVarghese@UGent.be								9218009		ECECE	10.1016/j.ecolecon.2012.10.005		English	Ecol. Econ.	Article	Scopus	Water, water management
Halder D., Bhowmick S., Biswas A., Chatterjee D., Nriagu J., Guha Mazumder D.N., Slejkovec Z., Jacks G., Bhattacharya P.	Risk of arsenic exposure from drinking water and dietary components: Implications for risk management in rural Bengal	2013	Environmental Science and Technology	47	2		1120	1127		6	http://www.scopus.com/inward/record.url?eid=2-s2.0-84872585435&partnerID=40&md5=3b6a83427d44699ac9eb4688b6c829b2	KTH-International Groundwater Arsenic Research Group, Department of Land and Water Resources Engineering, KTH Royal Institute of Technology, Teknikringen 76, SE-100 44 Stockholm, Sweden; Department of Chemistry, University of Kalyani, Kalyani 741235, West	Halder, D., KTH-International Groundwater Arsenic Research Group, Department of Land and Water Resources Engineering, KTH Royal Institute of Technology, Teknikringen 76, SE-100 44 Stockholm, Sweden, Department of Chemistry, University of Kalyani, Kalyani	This study investigates the risk of arsenic (As) exposure to the communities in rural Bengal, even when they have been supplied with As safe drinking water. The estimates of exposure via dietary and drinking water routes show that, when people are consumi		Arsenic exposure; Bangladesh; Daily intake; Dietary components; Drinking water standards; Safe drinking water; Safety threshold; Tolerable daily intake; World Health Organization; Arsenic; Risk management; Water supply; Health risks; arsenic; drinking wat		arsenic, 7440-38-2; Arsenic, 7440-38-2; Water Pollutants, Chemical				Nriagu, J.O., Bhattacharya, P., Mukherjee, A.B., Bundschuh, J., Zevenhoven, R., Loeppert, R.H., Arsenic in soil and groundwater: An overview (2007) Arsenic in Soil and Groundwater Environment, 9, pp. 3-60. , Bhattacharya, P. Mukherjee, A. B. Bundschuh, J.	Halder, D.; KTH-International Groundwater Arsenic Research Group, Department of Land and Water Resources Engineering, KTH Royal Institute of Technology, Teknikringen 76, SE-100 44 Stockholm, Sweden; email: dipti@kth.se								0013936X		ESTHA	10.1021/es303522s	23198808	English	Environ. Sci. Technol.	Article	Scopus	Water, water management
Ahmad S., Ahmad A., Ali H., Hussain A., Garcia y Garcia A., Khan M.A., Zia-Ul-Haq M., Hasanuzzaman M., Hoogenboom G.	Application of the CSM-CERES-Rice model for evaluation of plant density and irrigation management of transplanted rice for an irrigated semiarid environment	2013	Irrigation Science	31	3		491	506		2	http://www.scopus.com/inward/record.url?eid=2-s2.0-84876073134&partnerID=40&md5=de747c5e9524d5e12c7fe8877f950005	Department of Agronomy, Bahauddin Zakariya University, Multan, 60800, Pakistan; Agro-climatology Lab, University of Agriculture, Faisalabad, 38040, Pakistan; Department of Plant Sciences, University of Wyoming, Powell, WY, 82435-9135, United States; Execu	Ahmad, S., Department of Agronomy, Bahauddin Zakariya University, Multan, 60800, Pakistan; Ahmad, A., Agro-climatology Lab, University of Agriculture, Faisalabad, 38040, Pakistan; Ali, H., Department of Agronomy, Bahauddin Zakariya University, Multan, 608	The objectives of this study were to evaluate the performance of the Cropping System Model (CSM)-CERES (Crop-Environment Resource Synthesis)-Rice for simulating growth and yield of rice under irrigated conditions for a semiarid environment in Pakistan and		Biophysical analysis; Crop simulation model; Experimental datum; Irrigation management; Irrigation regimes; Semi-arid conditions; Semi-arid environments; Treatment combinations; Computer simulation; Crops; Economic analysis; Irrigation; Seed; Water manage						Ahmad, S., Hussain, A., Ali, H., Ashfaq, A., Transplanted fine rice (Oryza sativa L.) productivity as affected by plant density and irrigation regimes (2005) Intl J Agric Biol, 7, pp. 445-447; Ahmad, S., Hussain, A., Ali, H., Ahmad, A., Grain yield of tra	Hasanuzzaman, M.; Department of Agronomy, Faculty of Agriculture, Sher-e-Bangla Agricultural University, Dhaka, 1207, Bangladesh; email: mhzsauag@yahoo.com								3427188		IRSCD	10.1007/s00271-012-0324-6		English	Irrig. Sci.	Article	Scopus	Water, water management
Singh Y.V.	Crop and water productivity as influenced by rice cultivation methods under organic and inorganic sources of nutrient supply	2013	Paddy and Water Environment	11	2014-01-04		531	542		3	http://www.scopus.com/inward/record.url?eid=2-s2.0-84871715541&partnerID=40&md5=eb55d08369341089698be33ed15b72ed	Centre for Conservation and Utilization of Blue Green Algae (CCUBGA), Indian Agricultural Research Institute, New Delhi, 110012, India	Singh, Y.V., Centre for Conservation and Utilization of Blue Green Algae (CCUBGA), Indian Agricultural Research Institute, New Delhi, 110012, India	A field experiment was conducted during the wet seasons of 2010 and 2011 at New Delhi, India to study the influence of organic, inorganic, and integrated sources of nutrient supply under three methods of rice cultivation on rice yield and water productivi	Aerobic rice; Conventional transplanting; Integrated nutrient management; Organic rice; System of rice intensification (SRI)	Aerobic rice; Conventional transplanting; Nutrient management; Organic rice; System of rice intensifications; Nutrients; Water conservation; Water resources; Grain (agricultural product); Meloidogyne; Meloidogyne javanica						Aggarwal, G.C., Sidhu, A.S., Sekhon, N.K., Sandhu, K.S., Sur, H.S., Puddling and N management effects on crop response in a rice-wheat cropping system (1995) Soil Tillage Res, 36, pp. 129-139; Anbumozhi, V., Yamaji, E., Tabuchi, T., Rice crop growth and y	Singh, Y. V.; Centre for Conservation and Utilization of Blue Green Algae (CCUBGA), Indian Agricultural Research Institute, New Delhi, 110012, India; email: yvsingh63@yahoo.co.in								16112490			10.1007/s10333-012-0346-y		English	Paddy Water Environ.	Article	Scopus	Water, water management
Mishra A., Siderius C., Aberson K., van der Ploeg M., Froebrich J.	Short-term rainfall forecasts as a soft adaptation to climate change in irrigation management in North-East India	2013	Agricultural Water Management	127			97	106			http://www.scopus.com/inward/record.url?eid=2-s2.0-84880311911&partnerID=40&md5=0fa4403c49c62d68f423cf8fb2834d53	Agricultural and Food Engineering Department, IIT Kharagpur, Kharagpur, WB 721 302, India; ALTERRA, Wageningen-UR, 6708 PB Wageningen, Netherlands; Soil Physics, Ecohydrology and Groundwater Management Group, Wageningen-UR, 6708 PB Wageningen, Netherlands	Mishra, A., Agricultural and Food Engineering Department, IIT Kharagpur, Kharagpur, WB 721 302, India; Siderius, C., ALTERRA, Wageningen-UR, 6708 PB Wageningen, Netherlands; Aberson, K., Soil Physics, Ecohydrology and Groundwater Management Group, Wagenin	We explored the potential of using short-term weather forecasts to increase irrigation efficiency in rice cultivation, as a potential adaptation option to future climate change. We used 5-day hypothetically perfect rainfall forecasts and 4-day real rainfa	Climate change; Irrigation; North-East India; Rice crop; Soft adaptation; Weather forecast	Adaptation to climate changes; Alternative irrigations; Irrigation efficiency; Irrigation management; North-East India; Rice crops; Short-term rainfall forecast; Soft adaptation; Irrigation; Soil moisture; Water supply; Weather forecasting; Climate change						Abrol, I.P., Sustaining rice-wheat system productivity in the Indo-Gangetic plains: water management-related issues (1999) Agricultural Water Management, 40 (1), pp. 31-35; Ainsworth, E.A., Ort, D.R., How do we improve crop production in a warming world??	Mishra, A.; Agricultural and Food Engineering Department, IIT Kharagpur, Kharagpur, WB 721 302, India; email: amishra@agfe.iitkgp.ernet.in								3783774		AWMAD	10.1016/j.agwat.2013.06.001		English	Agric. Water Manage.	Article	Scopus	Water, water management, climate
Balasubramanian D., Arunachalam K., Arunachalam A., Das A.K.	Water hyacinth [Eichhornia crassipes (Mart.) Solms.] engineered soil nutrient availability in a low-land rain-fed rice farming system of north-east India	2013	Ecological Engineering	58			3	12		2	http://www.scopus.com/inward/record.url?eid=2-s2.0-84880274323&partnerID=40&md5=5d88d2a81ca87ed7e8a1ba6d8f3b44da	Department of Forestry, North Eastern Regional Institute of Science and Technology, Nirjuli 791109, Arunachal Pradesh, India; Department of Botany, Rajiv Gandhi University, Rono-Hills, Itanagar 791112, Arunachal Pradesh, India	Balasubramanian, D., Department of Forestry, North Eastern Regional Institute of Science and Technology, Nirjuli 791109, Arunachal Pradesh, India; Arunachalam, K., Department of Forestry, North Eastern Regional Institute of Science and Technology, Nirjuli	A study was conducted to investigate the mulch role of water hyacinth (Eichhornia crassipes) on soil properties of a lowland rain-fed rice farming system in north-east India. The green mulch had higher carbon and nutrient contents as compared to its compo	Carbon; Compost; Eichhornia crassipes; Mulch; N mineralization; Soil; Vermicompost	Eichhornia crassipes; Mulch; N mineralization; Net N mineralization; Nutrient contents; Pistia stratiotes; Sustainable agricultural; Vermicomposts; Carbon; Cellulose; Mineralogy; Nutrients; Rain; Soils; Water recycling; Composting; composting; nutrient av					Council of Scientific and Industrial Research	Allen, S.E., Grimshaw, H.M., Parkinson, J.A., Quarmby, C., (1974) Chemical analysis of Ecological Materials, , Blackwell Scientific Publications, Oxford, UK; Almadini, A.M., Physico-Chemical Properties of Composts Produced from Various Agricultural Residu	Arunachalam, K.; School of Environment and Natural Resources, Doon University, Dehradun 248001, Uttarakhand, India; email: arun70@icar.org.in								9258574		ECENE	10.1016/j.ecoleng.2013.06.001		English	Ecol. Eng.	Article	Scopus	Water, water management, sustainability
Sinhababu D.P., Sanjoy Saha S., Sahu P.K.	Performance of different fish species for controlling weeds in rainfed lowland rice field	2013	Biocontrol Science and Technology	23	12		1362	1372			http://www.scopus.com/inward/record.url?eid=2-s2.0-84886879042&partnerID=40&md5=f7bebf00a68cab950a65c0187accee67	Division of Crop Production, Central Rice Research Institute, Cuttack, India	Sinhababu, D.P., Division of Crop Production, Central Rice Research Institute, Cuttack, India; Sanjoy Saha, S., Division of Crop Production, Central Rice Research Institute, Cuttack, India; Sahu, P.K., Division of Crop Production, Central Rice Research In	A field experiment was conducted during wet season to evaluate the performance of different fish species for biocontrol of weeds in rainfed waterlogged rice fields with fingerlings of three exotic carps - grass carp, Ctenopharyngodon idella (Val.) (Cyprin	exotic carps; Indian carps; rainfed lowland rice field; rice-fish farming; weed control efficiency; weed flora and biomass	biocontrol agent; biomass; biotechnology; cyprinid; experimental study; growth rate; invasive species; lowland environment; paddy field; performance assessment; rainfed agriculture; straw; waterlogging; weed control; India						Ali, A.B., (1992) Rice-fish research and development in Asia, pp. 193-200. , In: De la Cruz C. R., Lightfoot C., Costa-Pierce B. A., Carangal V. R., Bimbao M. P., editors Manila,: ICLARM Conference Proceedings, 24; Alikhuni, K.H., (1957) Fish culture in I	Sinhababu, D. P.; Division of Crop Production, Central Rice Research Institute, Cuttack, India; email: sinhababucrri@rediffmail.com								9583157		BSTCE	10.1080/09583157.2013.838622		English	Biocontrol Sci. Technol.	Article	Scopus	weeds
Mahajan G., Chauhan B.S.	Herbicide options for weed control in dry-seeded aromatic rice in India	2013	Weed Technology	27	4		682	689			http://www.scopus.com/inward/record.url?eid=2-s2.0-84890372172&partnerID=40&md5=91ac9692f21aab5e39dbd6f3ca2918f9	Punjab Agricultural University, Ludhiana, Punjab, India; Crop and Environmental Sciences Division, International Rice Research Institute, Los-Baños, Philippines	Mahajan, G., Punjab Agricultural University, Ludhiana, Punjab, India; Chauhan, B.S., Crop and Environmental Sciences Division, International Rice Research Institute, Los-Baños, Philippines	The looming water crisis and shortage of labor during rice transplanting in northwest India have led researchers to develop alternative methods to transition away from puddled transplanted rice. In this context, dry-seeded rice (DSR) is emerging as an eff	Asia; Weed biomass; Weed control; Weed density; Yield	biomass; crop yield; cultivar; decision making; dryland farming; herbicide; rice; water availability; weed control; India						Akwar, N., Ehsanullah, K.J., Ali, M.A., Weed management improves yield and quality of direct seeded rice (2011) Aust. J. Crop Sci, 5, pp. 688-694; Azmi, M., Mashor, M., Weed succession from transplanting to directseeding method in Kemubu rice area (1995)	Chauhan, B.S.; Crop and Environmental Sciences Division, International Rice Research Institute, Los-Baños, Philippines; email: b.chauhan@irri.org								0890037X		WETEE	10.1614/WT-D-13-00016.1		English	Weed Technol.	Article	Scopus	weeds
Chauhan B.S., Abeysekara A.S.K., Kulatunga S.D., Madusanka I.U.	Weed Growth and Grain Yield, as Affected by Herbicides, in Dry-seeded Rice in Sri Lanka	2013	Journal of Crop Improvement	27	4		419	429			http://www.scopus.com/inward/record.url?eid=2-s2.0-84879679685&partnerID=40&md5=179e5540624fa4299e138c92f5f66022	Crop and Environmental Sciences Division, International Rice Research Institute, Los Baños, Philippines; Rice Research and Development Institute, Batalagoda, Sri Lanka	Chauhan, B.S., Crop and Environmental Sciences Division, International Rice Research Institute, Los Baños, Philippines; Abeysekara, A.S.K., Rice Research and Development Institute, Batalagoda, Sri Lanka; Kulatunga, S.D., Rice Research and Development Inst	Dry-seeded rice (Oryza sativa L.) is an emerging establishment system in irrigated areas in many Asian countries, including Sri Lanka. A field experiment was conducted in the major (Maha) 2011/12 and minor (Yala) 2012 seasons at the research farm of the R	Asia; weed biomass; weed control; weed density							Abeysekera, A.S.K., Herath, H.M.S., Wickrame, U.B., Johnson, D.E., Improving crop establishment and reducing losses from weeds in direct-seeded rice in Sri Lanka (2010) Research to impact: Case studies for natural resource management for irrigated rice in	Chauhan, B. S.DAPO Box 7777, Metro Manila, Philippines; email: b.chauhan@irri.org								15427528			10.1080/15427528.2013.789810		English	J. Crop Improv.	Article	Scopus	weeds
Chauhan B.S., Abeysekara A.S.K., Kulatunga S.D., Wickrama U.B.	Performance of different herbicides in a dry-seeded rice system in Sri Lanka	2013	Weed Technology	27	3		459	462		2	http://www.scopus.com/inward/record.url?eid=2-s2.0-84881436412&partnerID=40&md5=bbdcd9af2e5674c0aef4eca3f3516804	Crop and Environmental Sciences Division, International Rice Research Institute, Los-Baños, Philippines; Rice Research and Development Institute, Batalagoda, Sri Lanka	Chauhan, B.S., Crop and Environmental Sciences Division, International Rice Research Institute, Los-Baños, Philippines; Abeysekara, A.S.K., Rice Research and Development Institute, Batalagoda, Sri Lanka; Kulatunga, S.D., Rice Research and Development Inst	Dry-seeded rice systems are an emerging production technology in many Asian countries. A field study was conducted in 2011 and 2012 at the farm of the Rice Research and Development Institute, Batalagoda, Sri Lanka, to evaluate the performance of different	Asia; Herbicide efficacy; Weed biomass; Weed density	biomass; crop yield; herbicide; performance assessment; rice; seasonal variation; weed control; Sri Lanka						Abeysekera, A.S.K., Herath, H.M.S., Wickrame, U.B., Johnson, D.E., Improving crop establishment and reducing losses from weeds in direct-seeded rice in Sri Lanka (2010) Research to Impact: Case Studies for Natural Resource Management for Irrigated Rice in	Chauhan, B.S.; Crop and Environmental Sciences Division, International Rice Research Institute, Los-Baños, Philippines; email: b.chauhan@irri.org								0890037X		WETEE	10.1614/WT-D-12-00186.1		English	Weed Technol.	Article	Scopus	weeds
Chauhan B.S.	Effect of Shade on Growth and Yield of Weedy Rice (Oryza sativa L.) Biotypes and a Rice (Oryza sativa L.) Cultivar from Asia	2013	Journal of Crop Improvement	27	3		272	280			http://www.scopus.com/inward/record.url?eid=2-s2.0-84875985565&partnerID=40&md5=e37d4264680e48a784bafb8a788c3a8e	Crop and Environmental Sciences Division, International Rice Research Institute, Los Baños, Philippines	Chauhan, B.S., Crop and Environmental Sciences Division, International Rice Research Institute, Los Baños, Philippines	Four different experiments were conducted in a screen house to determine the effects of shade on growth and grain yield of three weedy rice biotypes (WRM from Malaysia, WRS from Sri Lanka, and WRV from Vietnam) and one cultivated rice variety (Rc 222 from	crop-weed competition; cultural weed control; direct-seeded rice; shade	Oryza sativa						Azmi, M., Abdullah, M.Z., Mislamah, B., Baki, B.B., Management of weedy rice (Oryza sativa L.): The Malaysian experience (2000) Wild and weedy rice in rice ecosystems in Asia-A review, Limited Proceedings No. 2, pp. 91-96. , In: Baki B. B., Chin D. V., Mo	Chauhan, B. S.DAPO Box 7777, Metro Manila, Philippines; email: b.chauhan@irri.org								15427528			10.1080/15427528.2013.765530		English	J. Crop Improv.	Article	Scopus	weeds
Manjunath K.B., Padmanabhan M., Shamaraj, Suresh Naik K.P., Hanumanthappa M.	Efficacy of different herbicides for weed control in transplanted rice in coastal Karnataka, India	2013	Plant Archives	13	1		559	563			http://www.scopus.com/inward/record.url?eid=2-s2.0-84882726737&partnerID=40&md5=01d80d60a9b5e81dda91a809dd539fdc	Department of Agronomy, College of Agriculture, U.A.S., Bangalore-65 (Karnataka), India	Manjunath, K.B., Department of Agronomy, College of Agriculture, U.A.S., Bangalore-65 (Karnataka), India; Padmanabhan, M., Department of Agronomy, College of Agriculture, U.A.S., Bangalore-65 (Karnataka), India; Shamaraj, Department of Agronomy, College o	The experiment was carried out at the Zonal Agricultural Research Station, Brahmavar, University of Agricultural Sciences, Bangalore (Karnataka), India to study the efficacy of different herbicides for weed control in transplanted rice in coastal Karnatak	Efficacy; Herbicides; Transplanted rice; Weed control							Begum, M., Juraimi, A.S., Syed Omer, S.R., Rajan, A., Azmi, M., Effect of herbicides for the control of Fimbristylis miliacea(L.) in rice (2008) J. Agron., 7 (3), pp. 251-257; Dubey, R.P., Moorthy, B.T.S., Gogoi, A.K., Bioefficacy of Acetachlor + Bensulfu	Department of Agronomy, College of Agriculture, U.A.S., Bangalore-65 (Karnataka), India								9725210					English	Plant Arch.	Article	Scopus	weeds
Manjunath K.B., Padmanabhan M., Shamaraj, Suresh Naik K.P., Hanumanthappa M.	Effect of weed control treatments on grain yield, nutrient uptake and soil microflora in transplanted rice (Oryza sativa L.) in coastal Karnataka, India	2013	Plant Archives	13	1		521	525			http://www.scopus.com/inward/record.url?eid=2-s2.0-84882707053&partnerID=40&md5=caf6fa7bb9b1789aea071c83ba6deb30	Department of Agronomy, College of Agriculture, U.A.S., Bangalore - 560 065 (Karnataka), India	Manjunath, K.B., Department of Agronomy, College of Agriculture, U.A.S., Bangalore - 560 065 (Karnataka), India; Padmanabhan, M., Department of Agronomy, College of Agriculture, U.A.S., Bangalore - 560 065 (Karnataka), India; Shamaraj, Department of Agron	A field experiment entitled "Effect of weed control treatments on grain yield, nutrient uptake and soil microflora in transplanted rice (Oryza sativa L.) in coastal Karnataka" was conducted during Kharif 2011 at Zonal Agricultural Research Station, Brahma	Grain yield; Nutrient uptake; Randomized block design; Transplanted rice (Oryza sativa L.); Weed control							Aulakh, C.S., Mehra, S.P., Nutrient uptake by red sprangletop [Leptochloa chinensis (L) Neels] and transplanted rice under different cultural and weed management practices (2008) Indian J. Weed Sci., 40 (1-2), pp. 21-26; Madhu, M., (1994) Critical Period	Shamaraj; Department of Agronomy, College of Agriculture, U.A.S., Bangalore - 560 065 (Karnataka), India; email: Sham_agri@rediffmail.com								9725210					English	Plant Arch.	Article	Scopus	weeds
Ghosh R.K., Mallick S., Bera S.	Efficacy of Bispyribac-sodium 10% SC against weed complex under different rice ecosystem	2013	Pestology	37	9		47	53			http://www.scopus.com/inward/record.url?eid=2-s2.0-84891129207&partnerID=40&md5=f14897c2ac8aaed54257bdc8f8c5ccb7	Department of Agronomy, Faculty of Agriculture, Bidhan Chandra Krishi Viswavidyalaya (BCKV), Mohanpur-741 252, Nadia, West Bengal, India	Ghosh, R.K., Department of Agronomy, Faculty of Agriculture, Bidhan Chandra Krishi Viswavidyalaya (BCKV), Mohanpur-741 252, Nadia, West Bengal, India; Mallick, S., Department of Agronomy, Faculty of Agriculture, Bidhan Chandra Krishi Viswavidyalaya (BCKV)	Efficacy of Bispyribac-sodium 10% SC (manufactured by Indofil Industries Ltd., Mumbai) was evaluated against weed complex i.e. Grasses, Sedges and Broad leaf weed of different rice cropping situation at West Bengal location as a post-emergence application		agricultural ecosystem; cropping practice; herbicide; phytotoxicity; rice; weed control; India; West Bengal						Anwar, M.P., Juralmi, A.S., Puteh, A., Man, A., Rahman, M.M., Efficacy, phytotoxicity and economics of different herbicides in aerobic rice (2012) Acta. Agrlc. Scandin, 62, pp. 604-615; Bera, S., Ghosh, R.K., Soil physico-chemical properties and microflor	Department of Agronomy, Faculty of Agriculture, Bidhan Chandra Krishi Viswavidyalaya (BCKV), Mohanpur-741 252, Nadia, West Bengal, India								9703012		PSTOE			English	Pestology	Article	Scopus	weeds, ecosystems
Mahajan G., Chauhan B.S., Gill M.S.	Dry-seeded rice culture in Punjab State of India: Lessons learned from farmers	2013	Field Crops Research	144			89	99		5	http://www.scopus.com/inward/record.url?eid=2-s2.0-84874403219&partnerID=40&md5=846406587352d3e16f63cc12c5ab89a8	Punjab Agricultural University, Ludhiana, India; International Rice Research Institute, Los Baños, Philippines	Mahajan, G., Punjab Agricultural University, Ludhiana, India; Chauhan, B.S., International Rice Research Institute, Los Baños, Philippines; Gill, M.S., Punjab Agricultural University, Ludhiana, India	Dry-seeded rice (DSR) is an emerging production system in Asia in the face of looming water scarcity, labor scarcity, and the energy crisis. The rice yield in this production system is highly variable. A survey was conducted during the kharif seasons of 2	Farmers' practice; Fertilizer; India; Pest; Water; Weed	agricultural technology; agricultural worker; agroecology; crop pest; crop yield; cultivar; emergence; farmers knowledge; fertilizer application; growing season; herbicide; perception; production system; productivity; questionnaire survey; seeding; water						Aggarwal, G.C., Sidhu, A.S., Sekhon, N.K., Sandhu, K.S., Sur, H.S., Puddling and N management effects on crop response in a rice-wheat cropping system (1995) Soil Till. Res., 36, pp. 129-139; Allah-Rang, Mangat, G.S., Rupinder-Kaur, (2011), pp. 1-26. , St	Chauhan, B.S.; Crop and Environmental Sciences Division, International Rice Research Institute, DAPO Box 7777, Metro Manila 4031, Laguna, Philippines; email: b.chauhan@irri.org								3784290		FCRED	10.1016/j.fcr.2013.01.008		English	Field Crops Res.	Article	Scopus	weeds, knowledge
Tiwari B.K., Sharma A., Sahare K.V., Tiwari K.P.	Impact of chemical weed management in transplanted rice in rainfed ecosystems through front line demonstration in Umaria District of Madhya Pradesh, India	2013	Plant Archives	13	1		583	586			http://www.scopus.com/inward/record.url?eid=2-s2.0-84882625207&partnerID=40&md5=6557b199b73a75661b3d523b9094161c	J.N.K.V.V., Krishi Vigyan Kendra, Umaria - 484 661 (Madhya Pradesh), India	Tiwari, B.K., J.N.K.V.V., Krishi Vigyan Kendra, Umaria - 484 661 (Madhya Pradesh), India; Sharma, A., J.N.K.V.V., Krishi Vigyan Kendra, Umaria - 484 661 (Madhya Pradesh), India; Sahare, K.V., J.N.K.V.V., Krishi Vigyan Kendra, Umaria - 484 661 (Madhya Prad	The front line demonstration was conducted on farmer's field at Umaria district during kharif season of 2007 and 2008 at three different locations under rainfed condition. Prevailing farmers practices were treated as control for comparison with recommende	B:C ratio; Transplanted rice; Weed management; Yield							Aulakh, C.S., Mehra, S.P., Integrated management of red sprangletop (Leptochloa chenensis) in transplanted rice (2006) Indian J. Weed Sci., 38, pp. 225-229; Choudhary, B.N., (1999) Krishi Vigyan Kendra-A Guide for KVK Managers, pp. 73-78. , Publication, D	J.N.K.V.V., Krishi Vigyan Kendra, Umaria - 484 661 (Madhya Pradesh), India								9725210					English	Plant Arch.	Article	Scopus	weeds, weed management, ecosystems
Lakshmanan A., Sankar A., Geethalakshmi V., Latha P., Sekhar N.U.	Role of blue green algal system in minimizing methane flux from rice soils	2012	Asian Journal of Microbiology, Biotechnology and Environmental Sciences	14	4		617	622			http://www.scopus.com/inward/record.url?eid=2-s2.0-84874093760&partnerID=40&md5=373217fb9bac682213f922be28dc09cb	Dept. of Nano Science and Technology, Tamil Nadu Agricultural University, Coimbatore 641 003, India; Agro Climate Research Centre, Tamil Nadu Agricultural University, Coimbatore 641 003, India; Institute of Agricultural and Environmental Research, Biofors	Lakshmanan, A., Dept. of Nano Science and Technology, Tamil Nadu Agricultural University, Coimbatore 641 003, India; Sankar, A., Agro Climate Research Centre, Tamil Nadu Agricultural University, Coimbatore 641 003, India; Geethalakshmi, V., Agro Climate R	Global warming induced by increasing concentration of greenhouse gases (GHGs) in the atmosphere is a matter of great environmental concern. A field experiment was conducted at Anbil Dharmalingam Agricultural College and Research Institute, Trichy, Tamil N	Azolla; Blue green algae; Methane; Paddy	carbon; green manure; methane; nitrogen; article; climate change; green alga; nitrogen fixation; nonhuman; rice; soil fertilization; soil management; soil pollution		carbon, 7440-44-0; methane, 74-82-8; nitrogen, 7727-37-9				Adhya, T.K., Rath, A.K., Gupta, P.K., Rao, V.R., Das, S.N., Parida, K.M., Parashar, D.C., Sethunathan, N., Methane emission from flooded rice fields under irrigated conditions (1994) Biol. Fertil. Soils, 18, pp. 243-248; Bharati, K., Mohanty, S.R., Influe	Lakshmanan, A.; Dept. of Nano Science and Technology, Tamil Nadu Agricultural University, Coimbatore 641 003, India; email: microlaxman@yahoo.com								9723005		AJMBA			English	Asian J. Microbiol. Biotechnol. Environ. Sci.	Article	Scopus	Climate
Ranjan R., Prasad V.	The challenges and potentials of the system of rice intensification (SRI) in addressing food security and developing resilience to climate change	2012	International Journal of Environmental, Cultural, Economic and Social Sustainability	7	6		81	94			http://www.scopus.com/inward/record.url?eid=2-s2.0-84874783493&partnerID=40&md5=e755edfbf0ba4d78635464fc36e84edd	Lohardaga Gram Swarajya Sansthan, Jharkhand, India; George Mason University, VA, United States	Ranjan, R., Lohardaga Gram Swarajya Sansthan, Jharkhand, India; Prasad, V., George Mason University, VA, United States	Climate change will have far reaching impacts on agricultural systems that increasingly experience droughts and floods, especially in the developing world. There is growing evidence that poor and vulnerable communities are the most affected by the changes	Climate change; Food security; India; Jharkhand; Resilience; System of rice intensification							Adhikari, P., Sen, D., Uphoff, N., (2010) System of Rice Intensification As a Resource Conserving Methodology: Contributing to Food Security In An Era of Climate Change, , http://www.satsawb.org/New_Arrivals/SRI_as_a_Resource.pdf, SATSA Mukhapatra, Annual	Ranjan, R.; Lohardaga Gram Swarajya Sansthan, Jharkhand, India								18322077					English	Int. J. Environ. Cult. Econ. Soc. Sustainability	Article	Scopus	Climate, food security
Singh R.K., Turner N.J., Pandey C.B.	"Tinni" rice (Oryza rufipogon Griff.) production: An integrated sociocultural agroecosystem in eastern Uttar Pradesh of India	2012	Environmental Management	49	1		26	43		3	http://www.scopus.com/inward/record.url?eid=2-s2.0-84856729689&partnerID=40&md5=f45ab2739f63a0255d2896e803deb883	Department of Technology Evaluation and Transfer, Central Soil Salinity Research Institute, CSSRI Campus, Karnal, Haryana 132001, India; School of Environmental Studies, University of Victoria, VIC, Canada; Department of Soil and Crop Management, Central	Singh, R.K., Department of Technology Evaluation and Transfer, Central Soil Salinity Research Institute, CSSRI Campus, Karnal, Haryana 132001, India; Turner, N.J., School of Environmental Studies, University of Victoria, VIC, Canada; Pandey, C.B., Departm	This study reports how Traditional Ecological Knowledge (TEK) and informal cultural institutions have conserved key varieties of the wildgrowing rice, 'tinni' (red rice, or brownbeard rice, Oriza rufipogon Griff.), within the Bhar community of eastern Utt	Agricultural biodiversity; Bhar community; Conservation; Gender roles; Oryza rufipogon; Tinni; Traditional ecological knowledge	Agricultural biodiversity; Bhar community; Gender roles; Oryza rufipogon; Tinni; Traditional ecological knowledge; Biodiversity; Conservation; Ecology; Food supply; Maintenance; Societies and institutions; rain; agricultural ecosystem; conservation manage						Agrawal, A., (2005) Environmentality: Technologies of Government and the Making of Subjects, , Duke University Press Durham, NC; Agrawal, A., Gibson, C.C., Enchantment and disenchantment: The role of community in natural resource conservation (1999) World	Singh, R.K.; Department of Technology Evaluation and Transfer, Central Soil Salinity Research Institute, CSSRI Campus, Karnal, Haryana 132001, India; email: ranjaysingh_jbp@rediffmail.com								0364152X		EMNGD	10.1007/s00267-011-9755-8	21959872	English	Environ. Manage.	Article	Scopus	Cold stress, heat stress, biodiversity, natural resource management, ecosystems, food security
Singh K.	Electricity subsidy in punjab agriculture: Extent and impact	2012	Indian Journal of Agricultural Economics	67	4		617	632			http://www.scopus.com/inward/record.url?eid=2-s2.0-84875346920&partnerID=40&md5=295505df6368222d5ff58012d14a7feb	Department of Economics and Sociology, Agro Economics Research Centre, Punjab Agricultural University, Ludhiana - 141 004, India	Singh, K., Department of Economics and Sociology, Agro Economics Research Centre, Punjab Agricultural University, Ludhiana - 141 004, India	The number of electric tubewells has increased, the area under rice, which means that major irrigation requirement has increased, while the water table has gone down, which means more power is needed to draw out the same quantity of water and the cost of		agricultural diversification; crop production; electricity supply; energy use; irrigation; profitability; rice; subsidy system; wheat; India; Punjab [India]; Triticum aestivum						Commission for agricultural costs and prices Government of India, Reports of Minimum Support Prices, Various Issues, , CACP; Statistical Abstracts of Punjab, Various Issues, , Government of Punjab; Agricultural production pattern adjustment programme in p	Singh, K.; Department of Economics and Sociology, Agro Economics Research Centre, Punjab Agricultural University, Ludhiana - 141 004, India								195014					English	Indian J. Agric. Econ.	Article	Scopus	Diversification
Jat R.A., Dungrani R.A., Arvadia M.K., Sahrawat K.L.	Diversification of rice (Oryza sativa L.)-based cropping systems for higher productivity, resource-use efficiency and economic returns in south Gujarat, India	2012	Archives of Agronomy and Soil Science	58	6		561	572			http://www.scopus.com/inward/record.url?eid=2-s2.0-84861557536&partnerID=40&md5=6f933b26a429d45afa9da2d464a2ddd3	International Crops Research Institute for the Semi-Arid Tropics, Patancheru, Hyderabad, India; Navsari Agricultural University, Navsari, India; ICRISAT-GT-Agroecosystem, Patancheru, Hyderabad, India	Jat, R.A., International Crops Research Institute for the Semi-Arid Tropics, Patancheru, Hyderabad, India; Dungrani, R.A., Navsari Agricultural University, Navsari, India; Arvadia, M.K., Navsari Agricultural University, Navsari, India; Sahrawat, K.L., ICR	The continuous growing of rice has led to a deterioration in soil quality, resulting in a serious threat to agricultural sustainability in the high rainfall zone of south Gujarat, India. Therefore, crop diversification with a wider choice in the productio	crop diversification; resource-use efficiency; rice-equivalent yield; sustainability	Abelmoschus; Abelmoschus esculentus; Allium cepa; Oryza sativa; Trigonella foenum-graecum; Triticum aestivum; Vigna sinensis						Aggarwal, G.C., Sidhu, A.S., Sekhon, N.K., Sandhu, K.S., Sur, H.S., Puddling and N management effects on crop response in a rice-wheat cropping systems (1995) Soil Till Res, 36, pp. 129-139; Anderson, R.I., Are some crops synergistic to following crops? (	Jat, R. A.; International Crops Research Institute for the Semi-Arid Tropics, Patancheru, Hyderabad, India; email: ra.jat@cgiar.org								3650340			10.1080/03650340.2010.533172		English	Arch. Agron. Soil Sci.	Article	Scopus	Diversification
Amarasinghe U.A., Shah T., Smakhtin V.	Water-milk nexus in India: A path to a sustainable water future?	2012	International Journal of Agricultural Sustainability	10	1		93	108		1	http://www.scopus.com/inward/record.url?eid=2-s2.0-84868250194&partnerID=40&md5=0dfc2d571fb5dcfbe63726adc2270b90	International Water Management Institute, Pusa, New Delhi, India	Amarasinghe, U.A., International Water Management Institute, Pusa, New Delhi, India; Shah, T., International Water Management Institute, Pusa, New Delhi, India; Smakhtin, V., International Water Management Institute, Pusa, New Delhi, India	This paper examines the nexus between milk production and water use in India. The nexus is examined in the context of extended consumptive water use (CWU) of milk production beyond drinking water. It includes the real CWU (evapotranspiration (ETa) that oc	Consumptive water use; Crop diversification; Groundwater irrigation; India; Milk production; Sustainable agriculture	agricultural diversification; alternative agriculture; drinking water; evapotranspiration; fodder; groundwater resource; irrigation; milk production; recharge; rice; sugar cane; sustainability; sustainable development; water use; India; Animalia						Allen, R.G., Crop evapotranspiration: Guidelines for computing crop water requirements (1998) FAO Irrigation and Drainage Paper No. 56, , FAO, Rome; Amarasinghe, U.A., Shah, T., Om Prakash, S., (2007) Changing consumption patterns: Implications on food an	Amarasinghe, U. A.; International Water Management Institute, Pusa, New Delhi, India; email: u.amarasinghe@cgiar.org								14735903			10.1080/14735903.2012.620336		English	Int. J. Agric. Sustainability	Article	Scopus	Diversification, sustainability
Raman A., Verulkar S.B., Mandal N.P., Variar M., Shukla V.D., Dwivedi J.L., Singh B.N., Singh O.N., Swain P., Mall A.K., Robin S., Chandrababu R., Jain A., Ram T., Hittalmani S., Haefele S., Piepho H.-P., Kumar A.	Drought yield index to select high yielding rice lines under different drought stress severities	2012	Rice	5	1		1	12			http://www.scopus.com/inward/record.url?eid=2-s2.0-84871240453&partnerID=40&md5=86a1381215a90825a1e6325bc41e33f0	International Rice Research Institute (IRRI), DAPO Box 7777, Metro Manila, Philippines; Indira Gandhi Krishi Vishwavidyalaya (IGKV), Raipur, India; Central Rainfed Upland Rice Research Station (CRURRS), Hazaribag, India; Narendra Dev University of Agricul	Raman, A., International Rice Research Institute (IRRI), DAPO Box 7777, Metro Manila, Philippines; Verulkar, S.B., Indira Gandhi Krishi Vishwavidyalaya (IGKV), Raipur, India; Mandal, N.P., Central Rainfed Upland Rice Research Station (CRURRS), Hazaribag,	Background: Drought is the most severe abiotic stress reducing rice yield in rainfed drought prone ecosystems. Variation in intensity and severity of drought from season to season and place to place requires cultivation of rice varieties with different le	Drought; Drought yield index; Genotype x environment interaction; Mixed model; Rice	Oryza sativa						Annichiarico, P., Genotype-environment interactions: Challenges and opportunities for plant breeding and cultivar recommendations (2002) FAO Plant Production and Protection Paper No. 174, , Food and Agriculture Organization, Rome; Araghi, S.G., Assad, M.T	Kumar, A.; International Rice Research Institute (IRRI), DAPO Box 7777, Metro Manila, Philippines; email: a.kumar@cgiar.org								19398425			10.1186/1939-8433-5-31		English	Rice	Article	Scopus	drought
Karim M.R., Ishikawa M., Ikeda M., Islam T.	Climate change model predicts 33 % rice yield decrease in 2100 in Bangladesh	2012	Agronomy for Sustainable Development	32	4		821	830			http://www.scopus.com/inward/record.url?eid=2-s2.0-84870943333&partnerID=40&md5=420e6169ef5bccb9e044b7fd4cb6e05d	Graduate School of Environmental Science, Hokkaido University, Sapporo, Japan; Bangladesh Institute of Nuclear Agriculture, BAU Campus, Mymensingh, Bangladesh; Road-5, Uttara, Dhaka 1230, Bangladesh	Karim, M.R., Graduate School of Environmental Science, Hokkaido University, Sapporo, Japan, Road-5, Uttara, Dhaka 1230, Bangladesh; Ishikawa, M., Graduate School of Environmental Science, Hokkaido University, Sapporo, Japan; Ikeda, M., Graduate School of	In Bangladesh, projected climate change is expected to increase food demands by more frequent and intense droughts and increasing temperatures. Few investigations have studied the impact of climate variability on future rice production. Previous investiga	Bangladesh; Climate; Rainfall; Rice; Temperature; Yield	climate change; climate effect; climate modeling; crop production; crop yield; cultivar; drought; food supply; numerical model; rainfall; rice; temperature effect; transplantation; water demand; Bangladesh						Agrawala, S., Ota, T., Ahmed, A.U., Smith, J., Aalst, M.V., (2003) Development and Climate Change in Bangladesh: Focus on Coastal Flooding and the Sunderbans., , Organization for Economic Co-operation and Development (OECD), Paris; Basak, J.K., Effects of	Karim, M.R.Road-5, Uttara, Dhaka 1230, Bangladesh; email: reza@ees.hokudai.ac.jp								17740746			10.1007/s13593-012-0096-7		English	Agron. Sustainable Dev.	Article	Scopus	drought
Karim M.R., Ishikawa M., Ikeda M.	Modeling of seasonal water balance for crop production in Bangladesh with implications for future projection	2012	Italian Journal of Agronomy	7	2		146	153			http://www.scopus.com/inward/record.url?eid=2-s2.0-84862273357&partnerID=40&md5=b4d91f45d0d8f5c9fbe8a99771358e46	Graduate School of Environmental Science, Hokkaido University, Japan	Karim, M.R., Graduate School of Environmental Science, Hokkaido University, Japan; Ishikawa, M., Graduate School of Environmental Science, Hokkaido University, Japan; Ikeda, M., Graduate School of Environmental Science, Hokkaido University, Japan	Regional or global climate change may have a significant effect on soil moisture and thereby affect plant growth. Water deficiency is considered to be one of the major climatic factors limiting crop production in Bangladesh, especially in the dry season.	Deficit; Evapotranspiration; Moisture; Season; Surplus; Water	air temperature; annual variation; climate change; coastal zone; crop production; crop yield; drought; hindcasting; mitigation; potential evapotranspiration; regional climate; rice; seasonality; soil moisture; water budget; water storage; Bangladesh; Chit						Agrawala, S., Ota, T., Ahmed, A.U., Smith, J., van Aalst, M., Development and climate change in Bangladesh: Focus on coastal flooding and the sundarbans (2003) Organization For Economic Co-operation and Development (OECD), , Paris, France; Ahmed, A.R., Bh	Karim, M. R.; Graduate School of Environmental Science, Hokkaido University, N10 W5, Sapporo 060-0810, Japan; email: reza@ees.hokudai.ac.jp								11254718			10.4081/ija.2012.e21		English	Ital. J. Agron.	Article	Scopus	drought
Datta K., Baisakh N., Ganguly M., Krishnan S., Shinozaki K.Y., Datta S.K.	Overexpression of Arabidopsis and Rice stress genes' inducible transcription factor confers drought and salinity tolerance to rice	2012	Plant Biotechnology Journal	10	5		579	586		4	http://www.scopus.com/inward/record.url?eid=2-s2.0-84860433074&partnerID=40&md5=18a774b91bf6f275330a88f5b878b1fb	Department of Botany, University of Calcutta, Kolkata, India; School of Plant, Environmental and Soil Sciences, Louisiana State University Agriculture Center, Baton Rouge, LA, United States; Department of Botany, Goa University, Goa, India; Graduate Schoo	Datta, K., Department of Botany, University of Calcutta, Kolkata, India; Baisakh, N., School of Plant, Environmental and Soil Sciences, Louisiana State University Agriculture Center, Baton Rouge, LA, United States; Ganguly, M., Department of Botany, Unive	Rice yield is greatly affected by environmental stresses such as drought and salinity. In response to the challenge of producing rice plants tolerant to these stresses, we introduced cDNA encoding the transcription factors DREB1A and DREB1B under the cont	Osmotic stress tolerance; Rice; Stress-inducible promoter; Transcription factor; Transformation	Arabidopsis protein; DREB1A protein, Arabidopsis; transcription factor; Arabidopsis; article; dehydration; drought; gene expression regulation; genetic transformation; genetics; halophyte; metabolism; physiological stress; physiology; promoter region; ric		Arabidopsis Proteins; DREB1A protein, Arabidopsis; Transcription Factors				Apel, K., Hirt, H., Reactive oxygen species: metabolism, oxidative stress and signal transduction (2004) Ann. Rev. Plant Biol., 55, pp. 373-379; Bhatnagar-Mathur, P., Devi, M.J., Reddy, D.S., Lavanya, M., Vadez, V., Serraj, R., Yamaguchi-Shinozaki, K., Sh	Datta, S.K.; Department of Botany, University of Calcutta, Kolkata, India; email: swpndatta@yahoo.com								14677644			10.1111/j.1467-7652.2012.00688.x	22385556	English	Plant Biotechnol. J.	Article	Scopus	drought
Auffhammer M., Ramanathan V., Vincent J.R.	Climate change, the monsoon, and rice yield in India	2012	Climatic Change	111	2		411	424		4	http://www.scopus.com/inward/record.url?eid=2-s2.0-84856746611&partnerID=40&md5=df75473d5451dcaa763d89da4ca4b141	Department of Agricultural and Resource Economics, University of California at Berkeley, Berkeley, CA 94720, United States; National Bureau of Economic Research, Cambridge, MA 02138, United States; Scripps Institution of Oceanography, University of Califo	Auffhammer, M., Department of Agricultural and Resource Economics, University of California at Berkeley, Berkeley, CA 94720, United States, National Bureau of Economic Research, Cambridge, MA 02138, United States; Ramanathan, V., Scripps Institution of Oc	Recent research indicates that monsoon rainfall became less frequent but more intense in India during the latter half of the Twentieth Century, thus increasing the risk of drought and flood damage to the country's wet-season (kharif) rice crop. Our statis		Extreme rainfall; Growing season; Monsoon rainfall; Monte Carlo Simulation; Rainfed; Rice crops; Rice yield; Twentieth century; Climate change; Drought; Flood damage; Monte Carlo methods; Rain; Atmospheric thermodynamics; agricultural technology; climate						Auffhammer, M., Ramanathan, V., Vincent, J.R., Integrated model shows that atmospheric brown clouds and greenhouse gases have reduced rice harvests in India (2006) Proc Natl Acad Sci USA, 103, pp. 19668-19672; (2010) Report on Price Policy for Kharif Crop	Vincent, J. R.; Nicholas School of the Environment and Sanford School of Public Policy, Duke University, Durham, NC 27708, United States; email: Jeff.Vincent@duke.edu								1650009		CLCHD	10.1007/s10584-011-0208-4		English	Clim. Change	Article	Scopus	drought
Singh P.K., Rathore L.S., Singh K.K., Rao D.V.B., Baxla A.K., Bhargav A.K.	Analysis of rainfall variability in the characteristics of rain-fed rice conditions in Eastern India	2012	International Journal of Meteorology	37	367		15	26			http://www.scopus.com/inward/record.url?eid=2-s2.0-84864233439&partnerID=40&md5=c28bde389aa178e677f81fb7292a6801	Agromet Service Cell, Mausam Bhavan, IMD, Lodhi Road, New Delhi, India; Andhra University, Visakhapattnam, India	Singh, P.K., Agromet Service Cell, Mausam Bhavan, IMD, Lodhi Road, New Delhi, India; Rathore, L.S., Agromet Service Cell, Mausam Bhavan, IMD, Lodhi Road, New Delhi, India; Singh, K.K., Agromet Service Cell, Mausam Bhavan, IMD, Lodhi Road, New Delhi, India	The rainfall and crop data of Eastern India were analyzed, namely Orissa, West Bengal, Assam, Jharkhand, East Uttar Pradesh, East Madhya Pradesh, Chhattisgrah and Bihar. The rain-fed rice is the main crop grown in this region. The greater part of the area	Drought; India; Rain; Rain-fed rice; Rainfall	crop yield; drought; productivity; rainfall; rainfed agriculture; semiarid region; Assam; Bihar; Chhattisgarh; India; Jharkhand; Madhya Pradesh; Uttar Pradesh; West Bengal						Biswas, B.C., Agroclimatic classification on the basis of moisture availability index and its application to the dry farming tract of Gujarat (1982) Mausam, 3 (4), pp. 465-469; (1998) Introduction to Arc View GIS, , Environment System Research Institute E	Singh, P.K.; Agromet Service Cell, Mausam Bhavan, IMD, Lodhi Road, New Delhi, India								17482992					English	Int. J. Meteorol.	Article	Scopus	drought
Sandhu N., Jain S., Battan K.R., Jain R.K.	Aerobic rice genotypes displayed greater adaptation to water-limited cultivation and tolerance to polyethyleneglycol-6000 induced stress	2012	Physiology and Molecular Biology of Plants	18	1		33	43			http://www.scopus.com/inward/record.url?eid=2-s2.0-84856404439&partnerID=40&md5=c515cce6ecf82f9256129fdb5e184430	Department of Molecular Biology and Biotechnology, CCS Haryana Agricultural University, Hisar 125004, India; Department of Biochemistry, CCS Haryana Agricultural University, Hisar 125004, India; Department of Genetics and Plant Breeding, Rice Research Sta	Sandhu, N., Department of Molecular Biology and Biotechnology, CCS Haryana Agricultural University, Hisar 125004, India; Jain, S., Department of Biochemistry, CCS Haryana Agricultural University, Hisar 125004, India; Battan, K.R., Department of Genetics a	Water scarcity and drought have seriously threatened traditional rice cultivation practices in several parts of the world including India. In the present investigation, experiments were conducted to see if the water-efficient aerobic rice genotypes develo	Aerobic; Drought; Indica; Polyethyleneglycol 6000; Root traits; SSR							Asch, F., Dingkuhn, M., Abdoulaye, S., Alain, A., Drought-induced changes in rooting patterns and assimilate partitioning between root and shoot in upland rice (2005) Field Crops Res, 93 (2), pp. 223-236; Beena, R., (2005) Studies On Physio-morphological	Jain, R. K.; Department of Molecular Biology and Biotechnology, CCS Haryana Agricultural University, Hisar 125004, India; email: rkjain@hau.ernet.in								9715894		PMBPF	10.1007/s12298-011-0094-2		English	Physiol. Mol. Biol. Plants	Article	Scopus	drought
Kumar A., Verulkar S.B., Mandal N.P., Variar M., Shukla V.D., Dwivedi J.L., Singh B.N., Singh O.N., Swain P., Mall A.K., Robin S., Chandrababu R., Jain A., Haefele S.M., Piepho H.P., Raman A.	High-yielding, drought-tolerant, stable rice genotypes for the shallow rainfed lowland drought-prone ecosystem	2012	Field Crops Research	133			37	47		5	http://www.scopus.com/inward/record.url?eid=2-s2.0-84861468702&partnerID=40&md5=3ccd63d23c73d5801d9f0f8a137f16dd	International Rice Research Institute (IRRI), DAPO Box 7777, Metro Manila, 4031 Los Banos, Laguna, Philippines; Indira Gandhi Krishi Vishwavidyalaya (IGKV), Raipur, India; Central Rainfed Upland Rice Research Station (CRURRS), Hazaribag, India; Narendra D	Kumar, A., International Rice Research Institute (IRRI), DAPO Box 7777, Metro Manila, 4031 Los Banos, Laguna, Philippines; Verulkar, S.B., Indira Gandhi Krishi Vishwavidyalaya (IGKV), Raipur, India; Mandal, N.P., Central Rainfed Upland Rice Research Stati	High and stable yield of rainfed lowland rice is important for sustainable rice production and food security. Many varieties grown on large holdings in rainfed areas provide good yield under normal water availability but suffer high losses in the event of	Drought; Genotypes; Rainfed shallow lowland; Rice; Stable	agricultural economics; agricultural ecosystem; alternative agriculture; crop yield; drought resistance; drought stress; environmental conditions; food security; genotype; paddy farming; rainfed agriculture; rice; water availability; India						Abamu, F.J., Alluri, K., AMMI analysis of rained lowland rice (Oryzasativa) trials in Nigeria (1998) Plant Breed, 117, pp. 395-397; Admassu, S., Nigussie, M., Zelleke, H., Genotype-environment interaction and stability analysis for grain yield of maize (Z	Kumar, A.; International Rice Research Institute (IRRI), DAPO Box 7777, Metro Manila, 4031 Los Banos, Laguna, Philippines; email: a.kumar@cgiar.org								3784290		FCRED	10.1016/j.fcr.2012.03.007		English	Field Crops Res.	Article	Scopus	drought, ecosystems, food security
Patra D.K.	Evaluation of new fungitoxicants against sheath rot of rice caused by sarocladium oryzae	2012	Pestology	36	8		50	52			http://www.scopus.com/inward/record.url?eid=2-s2.0-84866704195&partnerID=40&md5=2db09c1b7ce27ba1b974dc5d00efe8cb	Rice Research Station, Chinsurah-712 102, West Bengal, India	Patra, D.K., Rice Research Station, Chinsurah-712 102, West Bengal, India	Sheath rot disease of rice caused by Sarocladium oryzae is an important disease of rice in West Bengal and is one of the major production constraints in irrigated, rainfed upland (red and laterite tract) and rainfed lowland (shallow and deepwater) ecosyst	Kresoxim methyl 40% + Hexaconazole 8% WG; Management; Rice; Sheath rot	crop yield; disease severity; dose-response relationship; drought; fieldwork; fungal disease; fungicide; irrigation system; lowland environment; pesticide application; rainfed agriculture; rice; seasonality; yield response; India; West Bengal; Sarocladium						(2010) Progress Report, 2. , Anonymous 2010 Entomology and Pathology. Directorate of Rice Research (ICAR), Hyderabad-500 030, Andhra Pradesh; Biswas, A., Changing trends of rice diseases inWest Bengal, India (2000) J. Mycopathol. Res., 38 (1), pp. 33-36;	Patra, D.K.; Rice Research Station, Chinsurah-712 102, West Bengal, India								9703012		PSTOE			English	Pestology	Article	Scopus	drought, insect disease, insect management
Ghosh A., Dey R., Singh O.N.	Improved management alleviating impact of water stress on yield decline of tropical aerobic rice	2012	Agronomy Journal	104	3		584	588			http://www.scopus.com/inward/record.url?eid=2-s2.0-84861212053&partnerID=40&md5=1fbde2a82728d7ec15031a8ab263d428	Division of Crop Production, Central Rice Research Institute, Cuttack-753006, India	Ghosh, A., Division of Crop Production, Central Rice Research Institute, Cuttack-753006, India; Dey, R., Division of Crop Production, Central Rice Research Institute, Cuttack-753006, India; Singh, O.N., Division of Crop Production, Central Rice Research I	Yield decline is the major concern in tropical aerobic rice (Oryza sativa L.). Both biotic and abiotic factors were responsible for this phenomenon. No analytical information on actual causes was reported taking into account of responses of root to water		Oryza sativa						Bates, L.S., Woldren, R.P., Teare, I.D., Rapid determination of free proline for water stress studies (1973) Plant Soil, 39, pp. 205-208. , doi:10.1007/BF00018060; Belder, P., Bouman, B.A.M., Spiertz, J.H.J., Peng, S., Castaneda, A.R., Visperas, R.M., Cro	Ghosh, A.; Division of Crop Production, Central Rice Research Institute, Cuttack-753006, India; email: riceghosh@yahoo.com								21962		AGJOA	10.2134/agronj2011.0278		English	Agron. J.	Article	Scopus	drought, water, water management
Tahir H.M., Butt A., Mukhtar M.K., Bilal M., Khan S.Y.	Co-existence of four orb weaving spiders in the rice ecosystem	2012	Pakistan Journal of Zoology	44	6		1521	1528		1	http://www.scopus.com/inward/record.url?eid=2-s2.0-84871788125&partnerID=40&md5=c6a2a1ac8313b8e680ffd947a4defa7b	Department of Biological Sciences, University of Sargodha, Sargodha, Pakistan; Department of Zoology, University of the Punjab, Lahore, Pakistan	Tahir, H.M., Department of Biological Sciences, University of Sargodha, Sargodha, Pakistan; Butt, A., Department of Zoology, University of the Punjab, Lahore, Pakistan; Mukhtar, M.K., Department of Biological Sciences, University of Sargodha, Sargodha, Pa	Four orb weaving spider species i.e., Argiope trifasciata (Forsskal, 1775), Neoscona theisi (Walckenaer, 1841) of family Araneidae and Leucauge decorata (Blackwall, 1864), Tetragnatha javana (Thorell, 1890) of family Tetragnathidae co-exist in the rice ag	Co-existence; Niche overlap; Orb weaving spiders; Spatial segregation	agricultural ecosystem; body size; coexistence; competition (ecology); niche; prey size; resource availability; rice; selection; spatial analysis; spider; sympatry; Pakistan; Punjab [Pakistan]; Araneae; Araneidae; Argiope trifasciata; Leucauge decorata; N						Bristowe, W.S., The comity of spiders (1941) Ray Society, , London. 2 vols; Brown, K.M., Foraging ecology and niche partitioning in orb-weaving spiders (1981) Oecologia (Berl.), 50, pp. 380-385; Castillo, J.A., Eberhard, W.G., Use of artificial webs to de	Tahir, H.M.; Department of Biological Sciences, University of Sargodha, Sargodha, Pakistan; email: hafiztahirpk1@yahoo.com								309923		PJZOA			English	Pak. J. Zool.	Article	Scopus	Ecosystems
Kalmath B., Venkateshalu, Nadagouda S., Jukthihiremath S., Meenakshi B.C.	Characterization of Bacillus thuringiensis isolates from soils of rice ecosystem in UKP Area, Karnataka, India	2012	Journal of Pure and Applied Microbiology	66	4		1707	1714			http://www.scopus.com/inward/record.url?eid=2-s2.0-84874007095&partnerID=40&md5=0e4268d0ce35e522f59f6fdc74b36454	Department of Entomology, College of Agriculture Bheemarayanagudi, University of Agriculture Sciences, Raichur - 560 065, India; Department of Bioinformatics, KSWU, Bijapur, India; Department of Agriculture Microbiology, UAS, Bangalore, India	Kalmath, B., Department of Entomology, College of Agriculture Bheemarayanagudi, University of Agriculture Sciences, Raichur - 560 065, India; Venkateshalu, Department of Entomology, College of Agriculture Bheemarayanagudi, University of Agriculture Scienc	An investigation was conducted to study the diversity of entomopathogenic bacteria Bacillus thuringiensis, in rice ecosystem in UKP area Karnataka, India. Survey was conducted to collect soils from different places and Bacillus thuringiensis were isolated	Bacillus thuringensis; Bioassay; Crystal protein staining and rice ecosystem	article; Bacillus thuringiensis; bacterial endospore; bacterial virulence; bacterium isolate; bacterium isolation; bioassay; cell size; controlled study; ecosystem; larva; microbial diversity; mortality; nonhuman; rice; soil						Andrezejczak, S., Lonc, E., Selective isolation of Bacillus thuringiensis from soil by use of L-syrine as a minimal medium supplement (2008) Polish Journal of Microbiology, 57 (4), pp. 333-335; Carlton, B., Development of genetically improved strains of B	Kalmath, B.; Department of Entomology, College of Agriculture Bheemarayanagudi, University of Agriculture Sciences, Raichur - 560 065, India; email: bskalmath@rediffmail.com								9737510					English	J. Pure Appl. Microbiol.	Article	Scopus	Ecosystems
Premathilake R.	Human used upper montane ecosystem in the Horton Plains, central Sri Lanka - a link to Lateglacial and early Holocene climate and environmental changes	2012	Quaternary Science Reviews	50			23	42		1	http://www.scopus.com/inward/record.url?eid=2-s2.0-84864755842&partnerID=40&md5=b6a66a6caa5bc5644b878eaf3c8c3b17	Postgraduate Institute of Archaeology, University of Kelaniya, 407, Bauddhaloka Mawatha, Colombo 7, Sri Lanka	Premathilake, R., Postgraduate Institute of Archaeology, University of Kelaniya, 407, Bauddhaloka Mawatha, Colombo 7, Sri Lanka	This study utilizes radiocarbon-dated pollen, spores, . Sphagnum spp. macrofossils and total organic carbon proxies to examine variability of past climate, environment and human activity in montane rainforest, grassland and wetland of the Horton Plains (H	Climate; Horton Plains; Pollen; Rice and hunter-gatherers	Abrupt climate change; Biomass-burning; Climate; Environmental change; Holocene climate; Holocenes; Horton Plains; Human activities; Intertropical convergence zone; Last Glacial Maximum; Lateglacial; Low latitudes; Macrofossils; Monsoon rains; Montane eco						Agnihotri, R., Dutta, K., Bhushan, R., Somayajulu, B.L.K., Evidence for solar forcing on the Indian monsoon during the last millennium (2002) Earth and Planetary Science Letters, 198 (3-4), pp. 521-527; Alley, R.B., Agustsdottir, A.M., The 8k event: cause																		Ecosystems
Davari M.R., Sharma S.N., Mirzakhani M.	Effect of cropping systems and crop residue incorporation on production and properties of soil in an organic agroecosystem	2012	Biological Agriculture and Horticulture	28	3		206	222			http://www.scopus.com/inward/record.url?eid=2-s2.0-84876401936&partnerID=40&md5=7bd4509deefc106f6397b85ef08b2a8b	Department of Agriculture, Payame Noor University, Iran; Division of Agronomy, Indian Agricultural Research Institute, New Delhi, 110 012, India; Islamic Azad University, Farahan Branch, Iran	Davari, M.R., Department of Agriculture, Payame Noor University, Iran; Sharma, S.N., Division of Agronomy, Indian Agricultural Research Institute, New Delhi, 110 012, India; Mirzakhani, M., Islamic Azad University, Farahan Branch, Iran	Field experiments were conducted at the Indian Agricultural Research Institute, New Delhi, India, in 2006-2007 and 2007-2008 to study the effects of rice-wheat (RWCS)) and rice-wheat-mungbean (RWMCS) cropping systems and crop residue incorporation on the	available N; bulk density; energy output; microbial biomass; rice; wheat	agricultural ecosystem; agricultural management; biomass; bulk density; cereal; cropping practice; microbial community; nutrient availability; soil organic matter; soil property; Delhi; India; New Delhi; Actinobacteria; Actinobacteria (class); Bacteria (m						Agarwal, R.P., Phogat, V.K., Chand, T., Grewal, M.S., Improvements of soil physical conditions in Haryana (1995) Research Highlights. Hisar (India): Department of Soils, pp. 69-75. , C.C.S. Haryana Agricultural University; Alam, S.M., Azami, A.R., Influen	Davari, M.R.; Department of Agriculture, Payame Noor UniversityIran; email: mrdavari@gmail.com								1448765			10.1080/01448765.2012.735005		English	Biol. Agric. Hortic.	Article	Scopus	Ecosystems
Jadhao M.F., Khurad A.M.	Seasonal abundance of some of the dominant odonate predators of rice-ecosystem in central india	2012	Pestology	36	8		36	39			http://www.scopus.com/inward/record.url?eid=2-s2.0-84866696886&partnerID=40&md5=bc58b8417a9f1e12c2f61bed91533b74	Department of Zoology, S. N. Mor College, Tumsar-441912, Dist-Bhandara (Maharashtra), India; Department of Zoology, Nagpur University Campus, Nagpur-440 033, India	Jadhao, M.F., Department of Zoology, S. N. Mor College, Tumsar-441912, Dist-Bhandara (Maharashtra), India; Khurad, A.M., Department of Zoology, Nagpur University Campus, Nagpur-440 033, India	In both kharif (wet) and rabi (dry) seasons 4 species of dragon flies and 1 species of damsel fly predating on various stages of insect pests belonging to family, Lebellulidae and Coenagrionidae respectively were prominently recorded and identified. Among	Central india; Farmers' rice fields; Kharif; Odonate predators; Rabi	abundance; agricultural ecosystem; crop pest; dominance; dragonfly; growing season; integrated pest management; paddy field; pesticide application; predator; rice; seasonality; India; Agriocnemis; Anisoptera (dragonflies); Coenagrionidae; Hexapoda; Odonat						Anis Joseph, R., Role of predators and parasites in rice-ecosystem (2006) Agrobios Newsletter, 4 (9), p. 17; (1995) Directorate of Plant Protection, , Anonymous. Quarantine and Storage, Ministry of Agriculture, Govt, of India, N. H. IV, Faridabad-121 001;	Jadhao, M.F.; Department of Zoology, S. N. Mor College, Tumsar-441912, Dist-Bhandara (Maharashtra), India; email: mfjadhao@gmail.com								9703012		PSTOE			English	Pestology	Article	Scopus	Ecosystems
Singha B., Das S.K.	Removal of Pb(II) ions from aqueous solution and industrial effluent using natural biosorbents	2012	Environmental Science and Pollution Research	19	6		2212	2226		12	http://www.scopus.com/inward/record.url?eid=2-s2.0-84864114473&partnerID=40&md5=365ed4f415b7708c267f43edfed3b0b8	Department of Chemical Engineering, University of Calcutta, 92, A.P.C. Road, Kolkata 700009, India	Singha, B., Department of Chemical Engineering, University of Calcutta, 92, A.P.C. Road, Kolkata 700009, India; Das, S.K., Department of Chemical Engineering, University of Calcutta, 92, A.P.C. Road, Kolkata 700009, India	Purpose: The purpose of the research is to investigate the applicability of the low-cost natural biosorbents for the removal of Pb(II) ions from aqueous solution and effluent from battery industry. Methods: Six different biosorbents namely rice straw, ric	Batch process; Biosorbent; Diffusivity; Hyacinth roots; Pb(II) ions; Sorption energy	lead; aqueous solution; diffusion; effluent; energy efficiency; ion; lead; numerical model; pollutant removal; rice; thermodynamics; absorption; article; Azadirachta indica; chemistry; coconut; ecosystem restoration; industrial waste; industry; metabolism		lead, 13966-28-4, 7439-92-1; Industrial Waste; Lead, 7439-92-1; Water Pollutants, Chemical				Ali, I., The quest for active carbon adsorbent substitutes: inexpensive adsorbents for toxic metal ions removal from wastewater (2010) Separ Purif Rev, 39, pp. 95-171; Ali, I., Gupta, V.K., Advances in water treatment by adsorption technology (2007) Nat P	Das, S. K.; Department of Chemical Engineering, University of Calcutta, 92, A.P.C. Road, Kolkata 700009, India; email: drsudipkdas@vsnl.net								9441344		ESPLE	10.1007/s11356-011-0725-8	22293904	English	Environ. Sci. Pollut. Res.	Article	Scopus	Ecosystems
Zia-Ul-Qamar, Akhtar J., Ashraf M.Y., Sabir S.A., Ishaq W.	Use of carbon isotope discrimination technique to sustain rice productivity under stressed and low land irrigated ecosystem of Pakistan	2012	Pakistan Journal of Botany	44	SPL. ISS. 2		85	93			http://www.scopus.com/inward/record.url?eid=2-s2.0-84864106113&partnerID=40&md5=688dfb79b4c7a70816267a57141d58d4	Plant Breeding and Genetics Division, Nuclear Institute for Agriculture and Biology (NIAB), P.O. Box 128, Jhang Road, Faisalabad, Pakistan; Soil Science Division, Nuclear Institute for Agriculture and Biology (NIAB), P.O. Box 128, Jhang Road, Faisalabad,	Zia-Ul-Qamar, Plant Breeding and Genetics Division, Nuclear Institute for Agriculture and Biology (NIAB), P.O. Box 128, Jhang Road, Faisalabad, Pakistan; Akhtar, J., Soil Science Division, Nuclear Institute for Agriculture and Biology (NIAB), P.O. Box 128	Carbon Isotope Discrimination (Δ) is an indirect screening tool for breeding cultivars against water stressed conditions. Previous studies exhibited that leaf and straw Δ, under water stress, have positive and significant association with grain yield in r								Akhter, J., Mahmood, K., Tasneem, M.A., Malik, K.A., Naqvi, M.H., Hussain, F., Serraj, R., Water-use efficiency and carbon isotope discrimination of Acacia ampliceps and Eucalyptus camaldulensis at different soil moisture regimes under semi-arid condition	Zia-Ul-Qamar; Plant Breeding and Genetics Division, Nuclear Institute for Agriculture and Biology (NIAB), P.O. Box 128, Jhang Road, Faisalabad, Pakistan; email: zia_ul_qamar2003@yahoo.com								5563321					English	Pak. J. Bot.	Article	Scopus	Ecosystems
Sarkar S., Basu B., Kundu C.K., Patra P.K.	Deficit irrigation: An option to mitigate arsenic load of rice grain in West Bengal, India	2012	Agriculture, Ecosystems and Environment	146	1		147	152		6	http://www.scopus.com/inward/record.url?eid=2-s2.0-81455161638&partnerID=40&md5=07994a4dcce9ec76388ec8557cf195ed	Arsenic Research Group, Directorate of Research, Bidhan Chandra Krishi Viswavidyalaya, Kalyani 741235, India	Sarkar, S., Arsenic Research Group, Directorate of Research, Bidhan Chandra Krishi Viswavidyalaya, Kalyani 741235, India; Basu, B., Arsenic Research Group, Directorate of Research, Bidhan Chandra Krishi Viswavidyalaya, Kalyani 741235, India; Kundu, C.K.,	Farmers in arsenic (As) contaminated areas of West Bengal, India grow rice during dry months (January to April) and use underground water for irrigation with As concentration above WHO defined critical (0.01mgl -1) limit. In each season they add 50-150mgA	Arsenic; Deficit irrigation; Rice	agricultural ecosystem; arsenic; concentration (composition); crop yield; groundwater; irrigation system; rice; saturation; soil pollution; transplantation; World Health Organization; yield response; India; West Bengal						Brammer, H., Mitigation of arsenic contamination in irrigated paddy soils in South and South-east Asia (2009) Environ. Int., 35, pp. 856-863; Chaudhary, T.N., (1997) Water Management for Rice for Efficient Production. Bulletin, p. 63. , Directorate of Wat	Sarkar, S.; Arsenic Research Group, Directorate of Research, Bidhan Chandra Krishi Viswavidyalaya, Kalyani 741235, India; email: sdip2006@gmail.com								1678809		AEEND	10.1016/j.agee.2011.10.008		English	Agric. Ecosyst. Environ.	Article	Scopus	Ecosystems
Phattarakul N., Rerkasem B., Li L.J., Wu L.H., Zou C.Q., Ram H., Sohu V.S., Kang B.S., Surek H., Kalayci M., Yazici A., Zhang F.S., Cakmak I.	Biofortification of rice grain with zinc through zinc fertilization in different countries	2012	Plant and Soil	361	2014-01-02		131	141		8	http://www.scopus.com/inward/record.url?eid=2-s2.0-84869489573&partnerID=40&md5=1c7611b7bef156a572f974c1ab1c9cc9	Plant Genetic Resource and Nutrition Laboratory, Chiang Mai University, Chiang Mai, Thailand; The Soil and Fertilizer Institute, Anhui Academy of Agricultural Science, Hefei, 230031, China; Zhejiang Provincial Key Laboratory of Subtropic Soil and Plant Nu	Phattarakul, N., Plant Genetic Resource and Nutrition Laboratory, Chiang Mai University, Chiang Mai, Thailand; Rerkasem, B., Plant Genetic Resource and Nutrition Laboratory, Chiang Mai University, Chiang Mai, Thailand; Li, L.J., The Soil and Fertilizer In	Background: Increasing zinc (Zn) concentration of rice seed has potential benefits for human nutrition and health. Enhanced levels of Zn in grain also contributes greatly to crop production through better germination and seedling vigor of rice plants grow	Biofortification; Foliar spray; Rice; Zinc deficiency	concentration (composition); crop production; crop yield; cultivar; fertilizer application; flowering; food supplementation; germination; management practice; pH; public health; rice; seedling; vigor; zinc; China; India; Laos; Thailand; Turkey; Caryopsis						Black, R.E., Lindsay, H.A., Bhutta, Z.A., Caulfield, L.E., de Onnis, M., Ezzati, M., Mathers, C., Rivera, J., Maternal and child undernutrition: global and regional exposures and health consequences (2008) Lancet, 371, pp. 243-260; Bouis, H.E., Welch, R.M	Cakmak, I.; Faculty of Engineering and Natural Sciences, Sabanci University, 34956 Istanbul, Turkey; email: cakmak@sabanciuniv.edu								0032079X		PLSOA	10.1007/s11104-012-1211-x		English	Plant Soil	Article	Scopus	Fertilizer
Singh A., Sarkar A., Agrawal S.B.	Assessing the potential impact of fly ash amendments on Indian paddy field with special emphasis on growth, yield, and grain quality of three rice cultivars	2012	Environmental Monitoring and Assessment	184	8		4799	4814			http://www.scopus.com/inward/record.url?eid=2-s2.0-84864851265&partnerID=40&md5=c8912b55d15051fc6945e0557bf52c64	Laboratory of Air Pollution and Global Climate Change, Department of Botany, Banaras Hindu University, Varanasi 221 005, India	Singh, A., Laboratory of Air Pollution and Global Climate Change, Department of Botany, Banaras Hindu University, Varanasi 221 005, India; Sarkar, A., Laboratory of Air Pollution and Global Climate Change, Department of Botany, Banaras Hindu University, V	Proper disposal and/or recycling of different industrial waste materials have long been recognized as a prime environmental concern throughout the world, and fly ash is major amongst them. In the present study, we tried to assess the feasibilities of poss	Fly ash; Grain quality; Growth; Oryza sativa L; Soil amendments; Yield	AS-soils; Environmental concerns; Grain quality; Grain yield; Growth and yield; Growth performance; Growth response; Higher yield; Management strategies; Oryza sativa L; Paddy field soils; Paddy fields; Physico-chemicals; Potential impacts; Rice cultivars		cadmium, 22537-48-0, 7440-43-9; calcium, 14092-94-5, 7440-70-2; chromium, 14092-98-9, 16065-83-1, 7440-47-3; copper, 15158-11-9, 7440-50-8; iron, 14093-02-8, 53858-86-9, 7439-89-6; lead, 13966-28-4, 7439-92-1; magnesium, 7439-95-4; manganese, 16397-91-4,				Ahmaruzzaman, M., A review on the utilization of fly ash (2010) Progress in Energy and Combustion Science, 36, pp. 327-363; Allen, S.E., Grimshaw, H.M., Rowland, A.P., Chemical analysis (1986) Methods in Plant Ecology, pp. 285-344. , P. D. Moore & S. B. C	Agrawal, S.B.; Laboratory of Air Pollution and Global Climate Change, Department of Botany, Banaras Hindu University, Varanasi 221 005, India; email: sbagrawal56@gmail.com								1676369		EMASD	10.1007/s10661-011-2303-4	21901311	English	Environ. Monit. Assess.	Article	Scopus	Fertilizer
Hossain M.F., Elahi S.F., White S.K., Alam Q.K., Rother J.A., Gaunt J.L.	Nitrogen budgets for Boro rice (Oryza sativa L.) fields in Bangladesh	2012	Field Crops Research	131			97	109		1	http://www.scopus.com/inward/record.url?eid=2-s2.0-84859847234&partnerID=40&md5=f98f5a7ac17db1afb1e18fdca9aca14a	American International University-Bangladesh, House 58/B, Road 21, Kemal Ataturk Avenue, Banani, Dhaka 1213, Bangladesh; Natural Resources Canada, ESS/CCRS/EMS/AD, 588 Booth Street, Ottawa, K1A 0Y7 ON, Canada; Rothamsted-Research, Soil Science Department,	Hossain, M.F., American International University-Bangladesh, House 58/B, Road 21, Kemal Ataturk Avenue, Banani, Dhaka 1213, Bangladesh, Natural Resources Canada, ESS/CCRS/EMS/AD, 588 Booth Street, Ottawa, K1A 0Y7 ON, Canada, Rothamsted-Research, Soil Scie	Nitrogen (N) budgets are a valuable tool for improving N efficiency because they assess the size and interactions of various N pools, as well as their gains from the atmosphere and losses to the environment. To understand the impact of changes in manageme	Bangladesh; Ecological and conventional farming; Lowland systems; Nitrogen budgets; Rice	agronomy; complexity; farming system; fertilizer; irrigation system; lowland environment; management practice; nitrogen; nutrient use efficiency; paddy field; rice; soil nitrogen; Bangladesh; Oryza sativa						Anderson, J.M., Ingram, J.S.I., (1993) Tropical Soil Biology and Fertility. A Handbook of Methods, , CAB International, Wallingford, Oxon, UK; Askegaard, M., Olesen, J.E., Kristensen, K., Nitrate leaching from organic arable crop rotations: effects of loc	Hossain, M.F.; American International University-Bangladesh, House 58/B, Road 21, Kemal Ataturk Avenue, Banani, Dhaka 1213, Bangladesh; email: hossainfaruque@hotmail.com								3784290		FCRED	10.1016/j.fcr.2012.02.029		English	Field Crops Res.	Article	Scopus	Fertilizer, nitrogen
Bhatia A., Pathak H., Jain N., Singh P.K., Tomer R.	Greenhouse gas mitigation in rice-wheat system with leaf color chart-based urea application	2012	Environmental Monitoring and Assessment	184	5		3095	3107		1	http://www.scopus.com/inward/record.url?eid=2-s2.0-84862907268&partnerID=40&md5=4425bb6e2cfc34fa6a0c99ae3b0b9791	Division of Environmental Sciences, Indian Agricultural Research Institute, New Delhi 110012, India	Bhatia, A., Division of Environmental Sciences, Indian Agricultural Research Institute, New Delhi 110012, India; Pathak, H., Division of Environmental Sciences, Indian Agricultural Research Institute, New Delhi 110012, India; Jain, N., Division of Environ	Conventional blanket application of nitrogen (N) fertilizer results in more loss of N from soil system and emission of nitrous oxide, a greenhouse gas (GHG). The leaf color chart (LCC) can be used for real-time N management and synchronizing N application	Carbon efficiency ratio; Carbon equivalent emission; Demand driven N application; Global warming potential; Methane; Nitrous oxide	Blanket application; Carbon dioxide emissions; Carbon efficiency; Carbon equivalent emission; Conventional methods; GHG emission; Global warming potential; Greenhouse gas mitigation; Indo-Gangetic Plains; Leaf color; Nitrous oxide; Nitrous oxide emissions		carbon, 7440-44-0; carbon dioxide, 124-38-9, 58561-67-4; magnesium, 7439-95-4; methane, 74-82-8; nitrogen, 7727-37-9; nitrous oxide, 10024-97-2; urea, 57-13-6; Carbon Dioxide, 124-38-9; Methane, 74-82-8; Nitrogen, 7727-37-9; Nitrogen Dioxide, 10102-44-0;				Abdulrachman, S., Gines, H.C., Nagarajan, R., Satawathananont, S., Son, T.T., Tan, P.S., Variation in the performance of site-specific nutrient management among different environments with irrigated rice in asia (2002) Better Crops International, 16, pp.	Bhatia, A.; Division of Environmental Sciences, Indian Agricultural Research Institute, New Delhi 110012, India; email: artibhatia.iari@gmail.com								1676369		EMASD	10.1007/s10661-011-2174-8	21713481	English	Environ. Monit. Assess.	Article	Scopus	Fertilizer, nitrogen
Ahmad S., Ahmad A., Soler C.M.T., Ali H., Zia-Ul-Haq M., Anothai J., Hussain A., Hoogenboom G., Hasanuzzaman M.	Application of the CSM-CERES-Rice model for evaluation of plant density and nitrogen management of fine transplanted rice for an irrigated semiarid environment	2012	Precision Agriculture	13	2		200	218		4	http://www.scopus.com/inward/record.url?eid=2-s2.0-84857999894&partnerID=40&md5=c038bebeac37ed385f04427c087aab18	Department of Agronomy, Bahauddin Zakariya University, Multan 60800, Pakistan; Department of Agronomy, Agro-climatology Lab, University of Agriculture, Faisalabad 38040, Pakistan; Department of Biological and Agricultural Engineering, The University of Ge	Ahmad, S., Department of Agronomy, Bahauddin Zakariya University, Multan 60800, Pakistan, Department of Biological and Agricultural Engineering, The University of Georgia, Griffin, GA 30223, United States; Ahmad, A., Department of Agronomy, Agro-climatolo	The objectives of this study were to evaluate the performance of the cropping system model (CSM)-CERES-Rice to simulate growth and development of an aromatic rice variety under irrigated conditions in a semiarid environment of Pakistan and to determine th	Biomass; Crop management; Crop modeling; Decision support system for agrotechnology transfer; Grain yield	crop yield; decision making; economic analysis; fertilizer application; growth rate; irrigation; nitrogen; numerical model; nutrient cycling; rice; seedling; semiarid region; Faisalabad; Pakistan; Punjab [Pakistan]						Ahmad, S., Ahmad, A., Zia-ul-Haq, M., Ali, H., Khaliq, T., Anjum, M.A., Khan, M.A., Hoogenboom, G., Resources use efficiency of field grown transplanted rice (Oryza sativa L.) under irrigated semiarid environment (2009) Journal of Food, Agriculture and En	Hasanuzzaman, M.; Department of Agronomy, Faculty of Agriculture, Sher-e-Bangla Agricultural University, Dhaka 1207, Bangladesh; email: mhzsauag@yahoo.com								13852256		PREAF	10.1007/s11119-011-9238-1		English	Precis. Agric.	Article	Scopus	Fertilizer, nitrogen
Bijay-Singh, Varinderpal-Singh, Yadvinder-Singh, Thind H.S., Kumar A., Gupta R.K., Kaul A., Vashistha M.	Fixed-time adjustable dose site-specific fertilizer nitrogen management in transplanted irrigated rice (Oryza sativa L.) in South Asia	2012	Field Crops Research	126			63	69		1	http://www.scopus.com/inward/record.url?eid=2-s2.0-80054990826&partnerID=40&md5=eace43c1c149dfeff03876a1aa33d32c	ICAR National Professor Project, Punjab Agricultural University, Ludhiana 141 004, Punjab, India; Department of Soil Science, Punjab Agricultural University, Ludhiana 141 004, India	Bijay-Singh, ICAR National Professor Project, Punjab Agricultural University, Ludhiana 141 004, Punjab, India; Varinderpal-Singh, ICAR National Professor Project, Punjab Agricultural University, Ludhiana 141 004, Punjab, India; Yadvinder-Singh, Department	In the quest of enhancing nitrogen (N) use efficiency in irrigated transplanted rice beyond that observed with blanket recommendation, leaf colour chart (LCC) is being used to apply N whenever colour of the first fully opened leaf from the top is less gre	Fertilizer nitrogen management; Fixed-time adjustable nitrogen dose; Irrigated rice; Leaf colour chart	agricultural management; color; crop yield; cultivar; experimental study; fertilizer application; irrigation system; leaf; nitrogen; nutrient use efficiency; paddy farming; rice; tillering; transplantation; yield response; Gurdaspur; India; Ludhiana; Punj						Adhikari, C., Bronson, K.F., Panaullah, G.M., Regmi, A.P., Saha, P.K., Dobermann, A., Olk, D.C., Pasuquin, E., On-farm N supply and N nutrition in the rice-wheat system of Nepal and Bangladesh (1999) Field Crops Res., 64, pp. 273-286; Balasubramanian, V.,	Bijay-Singh; ICAR National Professor Project, Punjab Agricultural University, Ludhiana 141 004, Punjab, India; email: bijaysingh20@hotmail.com								3784290		FCRED	10.1016/j.fcr.2011.09.007		English	Field Crops Res.	Article	Scopus	Fertilizer, nitrogen
Nayak A.K., Gangwar B., Shukla A.K., Mazumdar S.P., Kumar A., Raja R., Kumar A., Kumar V., Rai P.K., Mohan U.	Long-term effect of different integrated nutrient management on soil organic carbon and its fractions and sustainability of rice-wheat system in Indo Gangetic Plains of India	2012	Field Crops Research	127			129	139		11	http://www.scopus.com/inward/record.url?eid=2-s2.0-83455201682&partnerID=40&md5=e31886e0481ff8f5d4d339fcea8849f5	Project Directorate of Farming Systems Research, Modipuram, Meerut, India; Central Rice Research Institute, Cuttack, Orissa, India; Central Rice Research Institute, Cuttack, Orissa, India; Indian Institute of Soil Science, Bhopal, India	Nayak, A.K., Project Directorate of Farming Systems Research, Modipuram, Meerut, India, Central Rice Research Institute, Cuttack, Orissa, India; Gangwar, B., Project Directorate of Farming Systems Research, Modipuram, Meerut, India, Indian Institute of So	Rice-wheat rotation is the most important cropping system of the Indo-Gangetic Plains (IGP) and is responsible for the food security of the region. The effect of different integrated nutrient management practices on soil organic carbon (SOC) stocks and it	Indo-Gangetic Plains; Rice-wheat cropping system; Sequestration; SOC fractions; Soil organic carbon; Yield trends	agricultural management; carbon sequestration; crop rotation; crop yield; fertilizer application; food security; fractionation; integrated approach; nitrogen; particulate organic carbon; phosphorus; potassium; rice; semiarid region; soil nutrient; soil or						Abrol, I.P., Bronson, K.F., Duxbury, J.M., Gupta, R.K., Long-term soil fertility experiments in rice-wheat cropping systems (2000) Rice-Wheat Consortium Paper Series 6, p. 171; Akselsson, C., Berg, B., Meentemeyer, V., Westling, O., Carbon sequestration r	Nayak, A.K.; Project Directorate of Farming Systems Research, Modipuram, Meerut, India; email: aknayak20@yahoo.com								3784290		FCRED	10.1016/j.fcr.2011.11.011		English	Field Crops Res.	Article	Scopus	Fertilizer, phosphorus, food security, nitrogen
Acharya R., Dash A.K., Senapati H.K.	Effect of integrated nutrient management on microbial activity influencing grainyield under rice-rice cropping system in an acid soil	2012	Asian Journal of Microbiology, Biotechnology and Environmental Sciences	14	3		365	368			http://www.scopus.com/inward/record.url?eid=2-s2.0-84870947820&partnerID=40&md5=9f7ef494c771d8b21eafbb84340e9f77	Department of Environmental Science, Utkal University, Odisha, India; Department of Soil Science and Agricultural Chemistry, Orissa University of Agriculture and Technology, Bhubaneswar, Odisha, India	Acharya, R., Department of Environmental Science, Utkal University, Odisha, India; Dash, A.K., Department of Soil Science and Agricultural Chemistry, Orissa University of Agriculture and Technology, Bhubaneswar, Odisha, India; Senapati, H.K.	An experiment was carried out to study the effect of integrated nutrient management on microbial population,nutrient uptake and grain yield under rice-rice cropping system. The trial was conducted in an acid laterite (Inceptisol) soil of Bhubaneswar, Odis	Acid soil; Grain yield; Microbial population; Nutrient management	calcium oxide; fertilizer; nitrogen; phosphorus; potassium; acidity; article; controlled study; crop; harvest; India; inorganic nutrient; manure; microbial activity; microbial population dynamics; nonhuman; nutrient uptake; organic nutrient; rice; soil; s		calcium oxide, 1305-78-8; nitrogen, 7727-37-9; phosphorus, 7723-14-0; potassium, 7440-09-7				Chandrayan, K., Adhya, T.K., Sethanatham, N., Dehydrogenase and invertase activity of flooded soils (1980) Soil Biology and Biochemistry, 12, pp. 271-273; (2002) World Agriculture: Towards 2015/2030 Summary Report, , ftp//Fao.orgdocrep/Fao/004/y3557c/y355	Acharya, R.; Department of Environmental Science, Utkal University, Odisha, India; email: rudhish.acharya@gmail.com								9723005		AJMBA			English	Asian J. Microbiol. Biotechnol. Environ. Sci.	Article	Scopus	Fertilizer, phosphorus, nitrogen
Bhattacharyya R., Tuti M.D., Bisht J.K., Bhatt J.C., Gupta H.S.	Conservation tillage and fertilization impact on soil aggregation and carbon pools in the Indian himalayas under an irrigated rice-wheat rotation	2012	Soil Science	177	3		218	228		5	http://www.scopus.com/inward/record.url?eid=2-s2.0-84858281492&partnerID=40&md5=6a5adb65885d71a2bfe4f8bcd11ab890	Indian Agricultural Research Institute, New Delhi, 110012, India; Vivekananda Institute of Hill Agriculture, Almora, Uttarakhand, India	Bhattacharyya, R., Indian Agricultural Research Institute, New Delhi, 110012, India; Tuti, M.D., Vivekananda Institute of Hill Agriculture, Almora, Uttarakhand, India; Bisht, J.K., Vivekananda Institute of Hill Agriculture, Almora, Uttarakhand, India; Bha	Soil conservation and carbon sequestration are critical issues in the Indian Himalayas. This study, conducted from 2005 through 2009 on a sandy clay loam soil near Almora, India, with two tillage (conventional tillage [CT] and zero tillage [ZT]) and five	Carbon retention; Indian Himalayas; labile and recalcitrant C pools; rice-wheat system; tillage and fertilization	agricultural management; carbon sequestration; concentration (composition); conservation tillage; crop rotation; fertilizer application; irrigation; manure; nitrogen; phosphorus; potassium; rice; soil aggregate; soil carbon; soil conservation; soil organi						Aoyama, M., Angers, D.A., N'Dayegamiye, A., Particulate and mineral-associated organic matter in water-stable aggregates as affected by mineral fertilizer and manure applications (1999) Canadian Journal of Soil Science, 79 (2), pp. 295-302; Angers, D.A.,	Bhattacharyya, R.; Indian Agricultural Research Institute, New Delhi, 110012, India; email: ranjan_vpkas@yahoo.com								0038075X		SOSCA	10.1097/SS.0b013e3182408f1e		English	Soil Sci.	Article	Scopus	Fertilizer, phosphorus, nitrogen, crop rotation
Mahajan G., Chauhan B.S., Timsina J., Singh P.P., Singh K.	Crop performance and water- and nitrogen-use efficiencies in dry-seeded rice in response to irrigation and fertilizer amounts in northwest India	2012	Field Crops Research	134			59	70		14	http://www.scopus.com/inward/record.url?eid=2-s2.0-84861445042&partnerID=40&md5=17e1caf6e50d8561237a2bae835bd1ea	Punjab Agricultural University, Ludhiana 141004 Punjab, India; International Rice Research Institute, Los Baños, Philippines	Mahajan, G., Punjab Agricultural University, Ludhiana 141004 Punjab, India; Chauhan, B.S., International Rice Research Institute, Los Baños, Philippines; Timsina, J., International Rice Research Institute, Los Baños, Philippines; Singh, P.P., Punjab Agric	Because of increasing constraints of labor and water availability, dry-seeded rice (DSR) is now considered to be a new and emerging rice production system in the northwest Indo-Gangetic Plains of India. However, limited information is available on optimiz	Fertilizers; Irrigation schedule; Nitrogen-use efficiency; Soil water potential	crop production; crop yield; dry matter; dryland farming; fertilizer application; hydrological regime; irrigation system; nutrient use efficiency; rice; soil depth; soil moisture; soil water potential; water management; water use efficiency; yield respons						Assmann, S.M., Shimazaki, K., The multisensory guard cell. Stomatal responses to blue light and abscisic acid (1999) Plant Physiol., 119, pp. 809-815; Belder, P., Bouman, B.A.M., Spiertz, J.H.J., Peng, S., Castaneda, A.R., Visperas, R.M., Crop performance	Chauhan, B.S.; Crop and Environmental Sciences Division, International Rice Research Institute, DAPO Box 7777, Metro Manila 4031, Laguna, Philippines; email: b.chauhan@irri.org								3784290		FCRED	10.1016/j.fcr.2012.04.011		English	Field Crops Res.	Article	Scopus	Fertilizer, water, water management, nitrogen
Bhattacharyya P., Roy K.S., Neogi S., Adhya T.K., Rao K.S., Manna M.C.	Effects of rice straw and nitrogen fertilization on greenhouse gas emissions and carbon storage in tropical flooded soil planted with rice	2012	Soil and Tillage Research	124			119	130		10	http://www.scopus.com/inward/record.url?eid=2-s2.0-84862488881&partnerID=40&md5=6a27addda53cd30c67f8007166cc69f3	Division of Crop Production, CRRI, Cuttack-753006, India; Soil Biology Division, Indian Institute of Soil Science, Bhopal-462038, Madhya Pradesh, India	Bhattacharyya, P., Division of Crop Production, CRRI, Cuttack-753006, India; Roy, K.S., Division of Crop Production, CRRI, Cuttack-753006, India; Neogi, S., Division of Crop Production, CRRI, Cuttack-753006, India; Adhya, T.K., Division of Crop Production	Effects of four years of inorganic and organic nitrogen (N) management on the emission of three major greenhouse gases (GHGs): methane (CH 4), carbon dioxide (CO 2) and nitrous oxide (N 2O), and on soil labile carbon fractions such as water-soluble carbon	Carbon storage; Green house gases; Rice soil; Soil carbon fractions; Soil enzymes and microbial population	Carbon emissions; Carbon management; Carbon storage; Cropping systems; Flooded rice; Flooded soil; Global warming potential; Grain yield; Green manures; Inorganic fertilizers; Labile carbon; Microbial biomass carbon; Microbial populations; Nitrogen fertil						Abd-el-Malek, Y., Hosny, I., Emam, N.F., Evaluation of media used for enumeration of denitrifying bacteria (1974) Zentralbl Bakteriol Parasitenkd Infektionskr Hyg., 129, pp. 415-421; Adam, G., Duncan, H., Development of a sensitive and rapid method for th	Bhattacharyya, P.; Central Rice Research Institute, Cuttack-753006, Orissa, India; email: pratap162001@yahoo.co.in								1671987		SOTRD	10.1016/j.still.2012.05.015		English	Soil Tillage Res.	Article	Scopus	Fertilizer, water, water management, nitrogen
Gangwar K.S., Chaudhary V.P., Pandey D.K., Gangward B., Singh K.K.	Mechanization practices in rice-wheat cropping systems in upper gangetic plains of India	2012	AMA, Agricultural Mechanization in Asia, Africa and Latin America	43	2		66	74			http://www.scopus.com/inward/record.url?eid=2-s2.0-84863456718&partnerID=40&md5=699b34fe342fb38f7ca0279d7a0d0c5a	Project Directorate for Cropping Systems Research, Modipuram, Meerut-250110 (U.P.), India	Gangwar, K.S., Project Directorate for Cropping Systems Research, Modipuram, Meerut-250110 (U.P.), India; Chaudhary, V.P., Project Directorate for Cropping Systems Research, Modipuram, Meerut-250110 (U.P.), India; Pandey, D.K., Project Directorate for Cro	A three year field study was conducted on crop establishment and tillage options in rice-wheat cropping systems in sub-tropical India at Project Directorate for Cropping Systems Research, Modipuram, Meerut, U.P., (India) from 1999 to 2002. The treatment i		Benefit cost ratios; Bulk density; Conventional tillage; Crop establishment; Cropping systems; Direct-seeding; Dry weight; Field studies; Grain yield; Infiltration rate; Physical parameters; Reduced tillage; Rice crops; Rice transplanter; Rice-wheat cropp						Aggarwal, G.C., Sidhu, A.S., Sekhon, N.K., Sandhu, K.S., Sur, H.S., Puddling and N management effect on crop response in rice -wheat cropping system (1995) Soil and Tillage Research, 36, pp. 129-130; (1987) Glossary of Soil ScienceTerms, , Anonymous, Soil	Gangwar, K.S.; Project Directorate for Cropping Systems Research, Modipuram, Meerut-250110 (U.P.), India								845841		AMAAD			English	AMA Agric Mech Asia Afr Lat Am	Article	Scopus	Field crop
Tandon S., Pujari A., Sand N.K.	Dissipation studies of fentrazamide (YRC-2388) in soil under anaerobic condition	2012	Journal of Environmental Monitoring	14	9		2521	2526			http://www.scopus.com/inward/record.url?eid=2-s2.0-84865464873&partnerID=40&md5=be2e7b34221cb4bf44245086a18d1e71	Department of Chemistry (Division of Agricultural Chemicals), College of Basic Sciences and Humanities, G. B. Pant University of Agriculture and Technology, Pantnagar 263 145 U. S. Nagar Uttarakhand, India	Tandon, S., Department of Chemistry (Division of Agricultural Chemicals), College of Basic Sciences and Humanities, G. B. Pant University of Agriculture and Technology, Pantnagar 263 145 U. S. Nagar Uttarakhand, India; Pujari, A., Department of Chemistry	Dissipation of fentrazamide in soil and water under flooded (anaerobic) conditions was studied. Fentrazamide was applied to soil at 100 g ha -1. Soil was extracted with 0.1 N HCl:acetone (1:1 v/v) followed by partition and cleanup with silica SPE. Separat		acetone; fentrazamide; herbicide; herbicide residue; hydrochloric acid; silicon dioxide; unclassified drug; water; anaerobic metabolism; article; calibration; controlled study; drug half life; flooding; grain; priority journal; quantitative analysis; rice		acetone, 67-64-1; hydrochloric acid, 7647-01-0; silicon dioxide, 10279-57-9, 14464-46-1, 14808-60-7, 15468-32-3, 60676-86-0, 7631-86-9; water, 7732-18-5; Herbicides; Pesticide Residues; Soil; Soil Pollutants; Tetrazoles; fentrazamide, 5HHK5TA5DD				Chhokar, R.S., (2001) Pesticides Information, 27 (1), pp. 25-27; Saikia, M., Purshothamam, S., (1996) Indian J. Agric. Sci., 66, pp. 70-72; Goto, T., Ito, S., Yanagi, A., Watanabe, Y., Yasui, K., (2002) Weed Biol. Manage., 2 (1), pp. 18-24; Yanagi, A., Wa	Tandon, S.; Department of Chemistry (Division of Agricultural Chemicals), College of Basic Sciences and Humanities, G. B. Pant University of Agriculture and Technology, Pantnagar 263 145 U. S. Nagar Uttarakhand, India; email: shishir_tandon2000@yahoo.co.i								14640325		JEMOF	10.1039/c2em30257h	22885472	English	J. Environ. Monit.	Article	Scopus	Flooding
Kar G., Sahoo N., Kumar A.	Deep-water rice production as influenced by time and depth of flooding on the east coast of India	2012	Archives of Agronomy and Soil Science	58	6		573	592		1	http://www.scopus.com/inward/record.url?eid=2-s2.0-84861557117&partnerID=40&md5=dd225daa0fb82bab40538006639ca080	ICAR, Directorate of Water Management, Bhubaneswar, India	Kar, G., ICAR, Directorate of Water Management, Bhubaneswar, India; Sahoo, N., ICAR, Directorate of Water Management, Bhubaneswar, India; Kumar, A., ICAR, Directorate of Water Management, Bhubaneswar, India	The saucer-shaped landform, high rainfall due to the south-west monsoon (June-September) and poor drainage conditions make certain parts of the east coast of India susceptible to waterlogging during the rainy season. There is no alternative other than to	deep water; east coast; flood; rice; waterlogging							Ambumozhi, V., Yamaji, E., Tabuchi, T., Rice crop growth and yield as influenced by changes in ponding water depth, water regime and fertigation level (1998) Agr Water Manage, 37, pp. 241-253; Baruah, K.K., Rajkhowa, S.C., Das, K., Physiological analysis	Kar, G.; ICAR, Directorate of Water Management, Bhubaneswar, India; email: kar_wtcer@yahoo.com								3650340			10.1080/03650340.2010.533173		English	Arch. Agron. Soil Sci.	Article	Scopus	Flooding
Subash N., Ram Mohan H.S.	Evaluation of the impact of climatic trends and variability in rice-wheat system productivity using Cropping System Model DSSAT over the Indo-Gangetic Plains of India	2012	Agricultural and Forest Meteorology	164			71	81			http://www.scopus.com/inward/record.url?eid=2-s2.0-84862303575&partnerID=40&md5=6abad37207401212c49787f1d8246e90	Project Directorate for Farming Systems Research, Indian Council of Agricultural Research, Modipuram, Meerut 250 110, Uttar Pradesh, India; Department of Atmospheric Sciences, School of Marine Sciences, Cochin University of Science and Technology, Cochin	Subash, N., Project Directorate for Farming Systems Research, Indian Council of Agricultural Research, Modipuram, Meerut 250 110, Uttar Pradesh, India; Ram Mohan, H.S., Department of Atmospheric Sciences, School of Marine Sciences, Cochin University of Sc	Indo-Gangetic Plains (IGP), accountable for the region's food security, has undergone climatic fluctuations and variability during the last three decades under the influence of natural or fast trend of population growth, urbanization and industrial develo	Climatic variability; Cropping system; Decision support system; Potential yield; Sensitivity analysis; Simulated yield	climate variation; crop yield; cropping practice; decision making; food security; growing season; numerical model; population growth; rice; sensitivity analysis; urbanization; wheat; Faizabad; Gangetic Plain; Haryana; Hisar; India; Uttar Pradesh; Triticum						Abrol, I.P., Bronson, K.F., Duxbury, J.M., Gupta, R.K., Long-term soil fertility experiments in rice-wheat cropping systems (2000), Rice-Wheat Consortium Research Series 6, New Delhi, IndiaAdams, R.M., Flemming, R.A., Chang, C.C., Mc Carl, B.A., Rosenzwei	Subash, N.; Project Directorate for Farming Systems Research, Indian Council of Agricultural Research, Modipuram, Meerut 250 110, Uttar Pradesh, India; email: nsuby@sify.com								1681923		AFMEE	10.1016/j.agrformet.2012.05.008		English	Agric. For. Meterol.	Article	Scopus	Food Security
Gerardeaux E., Giner M., Ramanantsoanirina A., Dusserre J.	Positive effects of climate change on rice in Madagascar	2012	Agronomy for Sustainable Development	32	3		619	627		2	http://www.scopus.com/inward/record.url?eid=2-s2.0-84863625853&partnerID=40&md5=801dadc4b2f504206c92a7da50810310	CIRAD, UPR SCA, TAB 102/02, avenue d'Agropolis, 34398 Montpellier Cedex 5, France; Fofifa, Antsirabe, Madagascar; CIRAD, UPR SCA, Antsirabe, Madagascar	Gerardeaux, E., CIRAD, UPR SCA, TAB 102/02, avenue d'Agropolis, 34398 Montpellier Cedex 5, France; Giner, M., CIRAD, UPR SCA, TAB 102/02, avenue d'Agropolis, 34398 Montpellier Cedex 5, France; Ramanantsoanirina, A., Fofifa, Antsirabe, Madagascar; Dusserre	Food security in many countries is threatened due to rapid population growth. Rising temperatures and carbon dioxide, rainfall irregularity, and global warming may have serious consequences on rice production and hence food security. However, there is lim	Cropping system. Climate changes; Malagasy highlands; Rainfed rice; Weather generator; Yield prediction	agricultural modeling; agronomy; alternative agriculture; climate change; climate effect; crop production; crop yield; cultivar; data set; food security; irrigation system; local adaptation; prediction; rainfed agriculture; rice; soil carbon; soil nitroge						Aggarwal, P.K., Mall, R.K., Climate change and rice yields in diverse agro-environments of India. II. Effect of uncertainties in scenarios and crop models on impact assessment (2002) Climatic Change, 52 (3), pp. 331-343. , DOI 10.1023/A:1013714506779; Agg	Gerardeaux, E.; CIRAD, UPR SCA, TAB 102/02, avenue d'Agropolis, 34398 Montpellier Cedex 5, France; email: gerardeaux@cirad.fr								17740746			10.1007/s13593-011-0049-6		English	Agron. Sustainable Dev.	Article	Scopus	Food Security
Joshi K.D., Devkota K.P., Harris D., Khanal N.P., Paudyal B., Sapkota A., Witcombe J.R.	Participatory research approaches rapidly improve household food security in Nepal and identify policy changes required for institutionalisation	2012	Field Crops Research	131			40	48		2	http://www.scopus.com/inward/record.url?eid=2-s2.0-84859818490&partnerID=40&md5=e5d48a95703b94dd20f86a4316aaea89	Centre for Advanced Research in International Agricultural Development (CARIAD), C/o CIMMYT South Asia Regional Office, P.O. Box 5186, Kathmandu, Nepal; Local Initiatives for Biodiversity, Research and Development (LI-BIRD), P.O. Box 324, Pokhara, Nepal;	Joshi, K.D., Centre for Advanced Research in International Agricultural Development (CARIAD), C/o CIMMYT South Asia Regional Office, P.O. Box 5186, Kathmandu, Nepal; Devkota, K.P., Local Initiatives for Biodiversity, Research and Development (LI-BIRD), P.	The introduction, testing, promotion and release of a rice variety, BG 1442, in Nepal were examined in relation to existing policies governing these procedures and to how more participatory approaches could benefit food security. From 1998 to 2006, partic	Adoption; Food security; Informal research and development (IRD); Participatory varietal selection (PVS); Policy change; Rice; Variety release	altitude; farmers attitude; fertilizer; food security; growing season; institutional development; nongovernmental organization; participatory approach; pesticide; policy development; research and development; research program; resource allocation; rice; s						(2004) Variety Release Proposal of Rice Variety BG 1442, , National Rice Research Programme, Hardinath, Nepal, Anonymous; Bødker, L., Wulff, E., Torp, J., (2006) Seed Sector Country Profile Bangladesh, vol. I: Overview of Seed Supply Systems and Seed Heal	Witcombe, J.R.; CARIAD, Bangor University, Gwynedd LL57 2UW, United Kingdom; email: j.r.witcombe@bangor.ac.uk								3784290		FCRED	10.1016/j.fcr.2012.03.001		English	Field Crops Res.	Article	Scopus	Food Security
Karmokar P.K., Shitan M., Kundu R.K.	Factors affecting the yield of high yielding variety Boro rice: An evidence from Rajshahi district of Bangladesh	2012	Journal of Food, Agriculture and Environment	10	2014-03-04		492	495		1	http://www.scopus.com/inward/record.url?eid=2-s2.0-84869142100&partnerID=40&md5=9e9b12aca5a8f4508deb36c114708297	Laboratory of Computational Statistics and Operations, Research Institute for Mathematical Research, Universiti Putra Malaysia, 43400 UPM Serdang, Selangor, Malaysia; Department of Mathematics, Faculty of Science, Universiti Putra Malaysia, 43400 UPM Serd	Karmokar, P.K., Laboratory of Computational Statistics and Operations, Research Institute for Mathematical Research, Universiti Putra Malaysia, 43400 UPM Serdang, Selangor, Malaysia, Department of Statistics, University of Rajshahi, Rajshahi-6205, Banglad	Rice is the most important agricultural crop in Bangladesh. The high yielding variety (HYV) Boro rice has the largest share among all the varieties of rice in the country. The yield of HYV Boro rice is strongly interrelated with the climatic and non-clima	Boro rice; Eigen-value; Factor analysis; High yielding variety; Yield	fertilizer; article; Bangladesh; Boro rice; carbon footprint; climate; cloud; environmental parameters; factorial analysis; high yielding variety; humidity; rice; temperature; wind						Rahman, A.Z., Correlations between green revolution and population growth: Revisited in the context of Bangladesh and India (2004) Asian Aff., 26 (2), pp. 41-60; Bhuiyan, N.I., Paul, D.N.R., Jabbar, M.A., (2002) Feeding the extra millions by 2025 challeng	Karmokar, P. K.; Laboratory of Computational Statistics and Operations, Research Institute for Mathematical Research, Universiti Putra Malaysia, 43400 UPM Serdang, Selangor, Malaysia; email: sprovash@yahoo.com								14590255					English	J. Food Agric. Environ.	Article	Scopus	Heat stress
Karmokar P.K., Shitan M.	Investigating impact of outliers in both independent and dependent variables on agricultural production data	2012	Journal of Food, Agriculture and Environment	10	1		573	577			http://www.scopus.com/inward/record.url?eid=2-s2.0-84856879544&partnerID=40&md5=e50375b3ce6a8f879584f0e2cca49eb4	Laboratory of Computational Statistics and Operations Research, Institute for Mathematical Research, Universiti Putra Malaysia, 43400 UPM Serdang, Selangor, Malaysia; Department of Mathematics, Faculty of Science, Universiti Putra Malaysia, Selangor, Mala	Karmokar, P.K., Laboratory of Computational Statistics and Operations Research, Institute for Mathematical Research, Universiti Putra Malaysia, 43400 UPM Serdang, Selangor, Malaysia, Department of Statistics, University of Rajshahi, Rajshahi-6205, Banglad	The production of high yielding variety (HYV) Boro rice depends on both climatic variables and some other non-climatic variables. Outliers may occur commonly in agriculture data. Regression outliers either in independent variables or in dependent variable	Climatic and non-climatic variables; High yielding variety (HYV); Least square estimators; Multiple regression; Outlier; Regression diagnostics; Robust regression	rain; agriculture; article; crop production; diagnosis related group; fertilizer application; humidity; nonhuman; plant yield; rice; solar radiation; temperature; wind						Mondal, M.H., Crop agriculture of Bangladesh: Challenges and opportunities (2010) Bangladesh. J. Agril. Res., 35 (2), pp. 235-245; Challinor, A.J., Slingo, J.M., Wheeler, T.R., Craufurd, P.Q., Grimes, D.I.F., Toward a combined seasonal weather and crop pr	Karmokar, P. K.; Laboratory of Computational Statistics and Operations Research, Institute for Mathematical Research, Universiti Putra Malaysia, 43400 UPM Serdang, Selangor, Malaysia; email: sprovash@yahoo.com								14590255					English	J. Food Agric. Environ.	Article	Scopus	Heat stress
Singh S.R., Singh A.P.	Treatment of water containg chromium (VI) using rice husk carbon as a newlow cost adsorbent	2012	International Journal of Environmental Research	6	4		917	924		3	http://www.scopus.com/inward/record.url?eid=2-s2.0-84868370912&partnerID=40&md5=483f5a5b2aa683c0b39ae554fef830ff	House Number 27, Deep Nagar Colony, near Transport Nagar, Agra, Uttar Pradesh, India; Faculty of Engineering and Technology, R.B.S. College, Bichpuri, Agra, Uttar Pradesh, India	Singh, S.R., House Number 27, Deep Nagar Colony, near Transport Nagar, Agra, Uttar Pradesh, India; Singh, A.P., Faculty of Engineering and Technology, R.B.S. College, Bichpuri, Agra, Uttar Pradesh, India	Presence of heavy metals in the aquatic systems has become a serious problem. As a result, there has been a great deal of attention given to new technologies for removal of heavy metal ions from contaminated waters. Adsorption is one of the effective meth	Activated carbon; Adsorption efficiency; Aqueous solution; Carcinogen; Electrostatic force; Reduction; Spectrum	activated carbon; adsorption; aqueous solution; carcinogen; chromate; chromium; dissolution; electrokinesis; experimental study; industrial waste; pollutant removal; spectrum; wastewater; water pollution; water treatment						Al-Ashesh, S., Banat, F., Al Omar, R., Duvnjak, Z., Predictions of binary sorption isotherms for the sorption of heavy metals by pine bark using single isotherm data (2000) Chemosphere, 41, pp. 659-665; Alimohammad, K.A., Jafari, H.R., Yavari, A.R., Prohi	Singh, S. R.House Number 27, Deep Nagar Colony, near Transport Nagar, Agra, Uttar Pradesh, India; email: v_shraddha1@rediffmail.com								17356865					English	Int. J. Environ. Res.	Article	Scopus	input cost
Grace P.R., Antle J., Aggarwal P.K., Ogle S., Paustian K., Basso B.	Soil carbon sequestration and associated economic costs for farming systems of the Indo-Gangetic Plain: A meta-analysis	2012	Agriculture, Ecosystems and Environment	146	1		137	146		1	http://www.scopus.com/inward/record.url?eid=2-s2.0-81355138359&partnerID=40&md5=d72dbd5da18cdad8efca6e0f74944cd5	Institute for Sustainable Resources, Queensland University of Technology, GPO Box 2434, Brisbane, QLD 4000, Australia; W.K. Kellogg Biological Station, Michigan State University, Hickory Corners, MI 49060, United States; Department of Agricultural and Res	Grace, P.R., Institute for Sustainable Resources, Queensland University of Technology, GPO Box 2434, Brisbane, QLD 4000, Australia, W.K. Kellogg Biological Station, Michigan State University, Hickory Corners, MI 49060, United States; Antle, J., Department	Soil organic carbon sequestration rates over 20 years based on the Intergovernmental Panel for Climate Change (IPCC) methodology were combined with local economic data to determine the potential for soil C sequestration in wheat-based production systems o	Economics; Greenhouse gases; Indo-Gangetic Plain; Soil carbon sequestration	carbon sequestration; cost-benefit analysis; crop production; environmental economics; greenhouse gas; Intergovernmental Panel on Climate Change; meta-analysis; rice; soil carbon; soil organic matter; wheat; zero tillage; Gangetic Plain; Gossypium hirsutu						Antle, J.M., Capalbo, S.M., Mooney, S., Elliott, E.T., Paustian, K.H., Spatial heterogeneity, contract design, and the efficiency of carbon sequestration policies for agriculture (2003) J. Environ. Econ. Manage., 46, pp. 231-250; Antle, J.M., Diagana, B.,	Grace, P.R.; Institute for Sustainable Resources, Queensland University of Technology, GPO Box 2434, Brisbane, QLD 4000, Australia; email: pr.grace@qut.edu.au								1678809		AEEND	10.1016/j.agee.2011.10.019		English	Agric. Ecosyst. Environ.	Article	Scopus	input cost
Sarkar A.	Sustaining livelihoods in face of groundwater depletion: A case study of Punjab, India	2012	Environment, Development and Sustainability	14	2		183	195			http://www.scopus.com/inward/record.url?eid=2-s2.0-84856762106&partnerID=40&md5=ff6fa7c06297a4c15dadcf80749ff95d	Department of Geography, Miranda House, Delhi University, Delhi 110007, India	Sarkar, A., Department of Geography, Miranda House, Delhi University, Delhi 110007, India	The study focuses on assessing the sustainable livelihoods of farmers in Indian Punjab focusing on the key aspects of cropping pattern, cost of cultivation, agricultural productivity and profitability amongst different classes of farmers at different leve	Coping strategy; Cost of cultivation; Groundwater irrigation; Livelihoods; Punjab	agricultural production; comparative study; crop yield; cropping practice; cultivation; farmers attitude; groundwater abstraction; groundwater resource; irrigation; maize; rice; sustainability; India; Punjab [India]; Zea mays						Bhatia, B., Lush fields and perched throats: Political economy of groundwater in Gujarat (1992) Economic and Political Weekly, 27 (51-52), pp. 142-170; (2007) Report on Dynamic Groundwater Resources of Punjab State, , Central Groundwater Board, North West	Sarkar, A.; Department of Geography, Miranda House, Delhi University, Delhi 110007, India; email: aninditasarkar28@gmail.com								1387585X		EDSNB	10.1007/s10668-011-9315-7		English	Environ. Dev. Sustainability	Article	Scopus	Irrigation cost
Kiran Kumar R.	Bio-efficacy of acaricides against leafmite, oligonychus oryzae (hirst) (acariña: Tetranychidae) on rice oryza sativa l	2012	Pestology	36	11		43	46			http://www.scopus.com/inward/record.url?eid=2-s2.0-84870410107&partnerID=40&md5=e9e22a7e7b0b310e088c9316c4d8fe8a	Entomology, Agricultural Extension Education Centre, Koppal-583 231, India; University of Agricultural Sciences, Raichur-584 102, Karnataka, India	Kiran Kumar, R., Entomology, Agricultural Extension Education Centre, Koppal-583 231, India, University of Agricultural Sciences, Raichur-584 102, Karnataka, India	Bio-efficacy of acaricides against leafmite Olygonychus oryzae (Hirst) (Acarina: Tetranychidae) on rice. A field experiment was conducted for two seasons during kharif 2007 and 2008 at Agricultural Research Station, Siruguppa. The acaricides viz., Diafent	Leaf mite; Nymphs and adults; Olygonychus oryzae; Treatments	abamectin; acaricide; adult; field method; mite; pest control; rice; India; Karnataka; Siruguppa; Acari; Oligonychus; Oryza sativa; Tetranychidae						Beard, J.J., Walter, G.H., Host plant specificity in several species of generalist mite predators (2001) Ecological Entomology, 26 (6), pp. 562-570. , DOI 10.1046/j.1365-2311.2001.00367.x; Cherian, M.C., South indian acarina (1938) J. Asiat. Soc. Berg. Ca	Kiran Kumar, R.; Entomology, Agricultural Extension Education Centre, Koppal-583 231, India								9703012		PSTOE			English	Pestology	Article	Scopus	LS pest
Sunitha Devi R., Venkat Reddy A., Malathi S., Vishnu Vardhan Reddy D.	Bio-efficacy of certain new insecticides against yellow stem borer, scirpophaga incertulas (walker) in rice	2012	Pestology	36	8		44	46			http://www.scopus.com/inward/record.url?eid=2-s2.0-84866640686&partnerID=40&md5=3080c7da65644b33c276c8f6efcc20de	Regional Agricultural Research Station, Warangal, A.P, India	Sunitha Devi, R., Regional Agricultural Research Station, Warangal, A.P, India; Venkat Reddy, A., Regional Agricultural Research Station, Warangal, A.P, India; Malathi, S., Regional Agricultural Research Station, Warangal, A.P, India; Vishnu Vardhan Reddy	Field experiment was conducted at Regional Agricultural Research Station, Warangal, Andhra Pradesh during rabi, 2010 to test the efficacy of new insecticides against Yellow tem borer, Scirphophaga incertulas (Walker). Buprofezin 20% + Acephate 50% at thre	Dead heart; Grain yield; Insecticides; Rice; White ear heads; Yellow stem borer	agricultural research; crop pest; crop yield; dose-response relationship; fieldwork; insecticide; pesticide application; rice; stem borer; Andhra Pradesh; India; Warangal; Scirpophaga incertulas						Hattori, I., Stem borer of graminaceous crops in South-East Asia. In Proceedings of the Symposium on Rice insects (1971) Tropical Agriculture Research Centre, pp. 143-153. , Japan Minist. Agric. Forest, Tokyo; Pathak, M.D., (1975) Insect Pests of Rice., p	Sunitha Devi, R.; Regional Agricultural Research Station, Warangal, A.P, India								9703012		PSTOE			English	Pestology	Article	Scopus	LS pest
Venkat Reddy A., Sunitha Devi R., Reddy D.V.V.	Evaluation of Cyazypyr - A new molecule against major insect pests of rice	2012	Pestology	36	2		27	30			http://www.scopus.com/inward/record.url?eid=2-s2.0-84858851194&partnerID=40&md5=74cc7ce166a1dc51dbc1d38687aa728d	RegionalAgricultural Research Station, Angrau, Dist: Warangal-506 007, A.P., India	Venkat Reddy, A., RegionalAgricultural Research Station, Angrau, Dist: Warangal-506 007, A.P., India; Sunitha Devi, R., RegionalAgricultural Research Station, Angrau, Dist: Warangal-506 007, A.P., India; Reddy, D.V.V., RegionalAgricultural Research Statio	A field trial was'conducted during Kharif and Rabi 2010-2011 at Regional Agricultural Research Station, Warangal, A.P. to evaluate the efficacy of new molecule of insecticide- Cyazypyr ( HGW86 10% w/v OD) along with other insecticides against major insect	Cyazypyr; Hgw 86 10% w/v od; Insect pests; Phytotoxicity; Rice; Yield	chemical control; crop pest; crop yield; gall insect; insecticide; phytotoxicity; rice; stem borer; Andhra Pradesh; India; Warangal; Archaeorrhyncha; Cecidomyiidae; Hexapoda						Dhaliwal, G.S., Arora, R., (2001) Integrated Pest Management: Concepts and Approaches, p. 109. , Kalyani publishers, New Delhi; Heinrichs, E.A., (1994) Biology and Management of Rice Insects, p. 779. , Wiley Eastern Ltd, New Delhi; Krishnaiah, K., Reddy,	Venkat Reddy, A.; RegionalAgricultural Research Station, Angrau, Dist: Warangal-506 007, A.P., India								9703012		PSTOE			English	Pestology	Article	Scopus	LS pest
Singh B.	Incidence of the pink noctuid stem borer, sesamia inferens (Walker), on wheat under two tillage conditions and three sowing dates in North-western plains of India	2012	Journal of Entomology	9	6		368	374		1	http://www.scopus.com/inward/record.url?eid=2-s2.0-84864330890&partnerID=40&md5=69804704c6d40d5ad11e773bb073b309	Department of Plant Breeding and Genetics, Punjab Agricultural University, Ludhiana-141004, Punjab, India	Singh, B., Department of Plant Breeding and Genetics, Punjab Agricultural University, Ludhiana-141004, Punjab, India	The pink stem borer, Sesamia inferens (Walker) (Lepidoptera: Noctuidae) is emerging as an important pest of wheat in India due to change in tillage system. It causes severe damage by forming dead hearts at seedling stage and white ears at ear-head stage.	Dates of sowing; North-western plains of India; Rice wheat system; Sesamia inferens (walker); Tillage conditions	Lepidoptera; Noctuidae; Sesamia inferens; Triticum aestivum						Ahad, M.D.A., Hossain, M.A., El Taj, H.F., Khan, M.D.A., Islam, M.J., Relative susceptibility of some wheat lines to the pink borer, Sesamia inferens Walker (Lepidoptera: Noctuidae) on wheat (2002) Asian J. Plant Sci, 1, pp. 405-406; Akhtar, M.A., Zakria,	Singh, B.; Department of Plant Breeding and Genetics, Punjab Agricultural University, Ludhiana-141004, Punjab, India								18125670			10.3923/je.2012.368.374		English	J. Entomol.	Article	Scopus	LS pest
Kiran Kumar R., Venkateshulu B., Veeranna R.	Efficacy of imidacloprid 0.3% GR against brown plant hopper (BPH) nilaparvata lugens (STAL) (cicadellidae: Homoptera) on paddy oryza sativa l	2012	Pestology	36	9		44	47			http://www.scopus.com/inward/record.url?eid=2-s2.0-84868150480&partnerID=40&md5=d8a3e18fc1457de52502a52a86eab8d8	Agricultural Extension Education Centre, Koppal-583 231, India; Dept. of Entomology, College of Agriculture, University of Agricultural Sciences, Raichur-584 102, India; Krishi Vigyan Kendra, Bagalkot, Karnataka, India	Kiran Kumar, R., Agricultural Extension Education Centre, Koppal-583 231, India; Venkateshulu, B., Dept. of Entomology, College of Agriculture, University of Agricultural Sciences, Raichur-584 102, India; Veeranna, R., Krishi Vigyan Kendra, Bagalkot, Karn	Efficacy of Imidacloprid 0.3GR @ 10,15,20,25 and 40 kg/ha against the brown plant hopper of rice, Nilaparvata lugens (CicadeIIidae:Homoptera) was evaluated under field condition at Agricultural Research Station, Gangavati, Karnataka during Sept-Dec 2009 a	BPH; Imidacloprid; Insecticide; Nilaparvata lugens; Phorate; Rice	agricultural research; imidacloprid; pesticide application; planthopper; research institution; rice; India; Karnataka; Archaeorrhyncha; Cicadellidae; Hemiptera; Nilaparvata lugens; Oryza sativa						(2006) Handbook of Agriculture, p. 564. , Anon, Indian Agricultural Research Institute, New Delhi; Arora, R., Dhallwal, G.S., Agroecological changes and insect pest problems in Indian agriculture (1996) Indian J. Ecol., 23, pp. 119-122; Elzen, G.W., Letha	Kiran Kumar, R.; Agricultural Extension Education Centre, Koppal-583 231, India								9703012		PSTOE			English	Pestology	Article	Scopus	LS pest
Rani T.S., Pillai G.R.	Seasonal and varietal influence on pest and disease incidence in rice	2012	Plant Archives	12	1		201	204			http://www.scopus.com/inward/record.url?eid=2-s2.0-84862519968&partnerID=40&md5=3380981459b475e3abab575b03362193	Instructional Farm, College of Agriculture, Vellayani, Thiruvananthapuram - 695 522 (Kerala), India	Rani, T.S., Instructional Farm, College of Agriculture, Vellayani, Thiruvananthapuram - 695 522 (Kerala), India; Pillai, G.R., Instructional Farm, College of Agriculture, Vellayani, Thiruvananthapuram - 695 522 (Kerala), India	An e×periment was laid out in strip plot design with three dates of planting and five varieties during kharif, rabi and summer seasons in 1998-99 at College of Agriculture, Vellayani, Thiruvananthapuram (Kerala), India. In all seasons on all dates of tran	Gall midge; Leaf roller; Rice bug; Sheath rot and sheath blight	Cecidomyiidae; Leptocorisa acuta; Tortricidae						Dhal, N.K., Choudhary, N., Effect of planting time and fungicidal spray on sheath rot of rice (1987) Oryza, 24 (3), pp. 274-276; Kerala Agricultural university (1996) Package of Practices, p. 4. , KAU. Recommendations. Crops. 1996. Directorate of Extensio	Rani, T.S.; Instructional Farm, College of Agriculture, Vellayani, Thiruvananthapuram - 695 522 (Kerala), India								9725210					English	Plant Arch.	Article	Scopus	LS pest, LSP disease
Das A., Soubam D., Singh P.K., Thakur S., Singh N.K., Sharma T.R.	A novel blast resistance gene, Pi54rh cloned from wild species of rice, Oryza rhizomatis confers broad spectrum resistance to Magnaporthe oryzae	2012	Functional and Integrative Genomics	12	2		215	228		8	http://www.scopus.com/inward/record.url?eid=2-s2.0-84864679498&partnerID=40&md5=fcbd005710bdd35276285439671fe246	National Research Centre on Plant Biotechnology, Indian Agricultural Research Institute, New Delhi 110 012, India; Division of Crop Improvement, Indian Institute of Pulses Research, Kanpur, Uttar Pradesh 208 024, India	Das, A., National Research Centre on Plant Biotechnology, Indian Agricultural Research Institute, New Delhi 110 012, India, Division of Crop Improvement, Indian Institute of Pulses Research, Kanpur, Uttar Pradesh 208 024, India; Soubam, D., National Resea	The dominant rice blast resistance gene, Pi54 confers resistance to Magnaporthe oryzae in different parts of India. In our effort to identify more effective forms of this gene, we isolated an orthologue of Pi54 named as Pi54rh from the blast-resistant wil	Allele mining; Magnaporthe oryzae; NBS-LRR; Oryza rhizomatis; Pi54; Pikh; Rice blast	Pi54rh protein; unclassified drug; vegetable protein; 3' untranslated region; 5' untranslated region; article; cellular distribution; controlled study; disease resistance; extracellular space; gene expression; genetic complementation; glycosylation; Magna	GENBANK: AB013448, AB379816, AB430853, AB510262, AB570371, AB604626, AF207842, AY914077, DQ285630, DQ352040, DQ352453, DQ900896, DQ923494, EU869185, FJ773286, FJ915121, HM035360, HM048900	Plant Proteins				Altschul, S.F., Madden, T.L., Schaffer, A.A., Zhang, J., Zhang, Z., Miller, W., Lipman, D.J., Gapped BLAST and PSI-BLAST: A new generation of protein database search programs (1997) Nucleic Acids Research, 25 (17), pp. 3389-3402. , DOI 10.1093/nar/25.17.3	Sharma, T.R.; National Research Centre on Plant Biotechnology, Indian Agricultural Research Institute, New Delhi 110 012, India; email: trsharma1965@gmail.com								1438793X		FIGUB	10.1007/s10142-012-0284-1	22592658	English	Funct. Integr. Genomics	Article	Scopus	LSP disease
Sharma R., Manhas R.K., Magotra R.	Ethnoveterinary remedies of diseases among milk yielding animals in Kathua, Jammu and Kashmir, India	2012	Journal of Ethnopharmacology	141	1		265	272		4	http://www.scopus.com/inward/record.url?eid=2-s2.0-84859777428&partnerID=40&md5=51c8ac5dbe390ac3b113dbe3451d34a1	Department of Botany, University of Jammu, Jammu 180006, Jammu and Kashmir, India; Department of Botany, Govt. Degree College, Kathua 184104, Jammu and Kashmir, India	Sharma, R., Department of Botany, University of Jammu, Jammu 180006, Jammu and Kashmir, India; Manhas, R.K., Department of Botany, Govt. Degree College, Kathua 184104, Jammu and Kashmir, India; Magotra, R., Department of Botany, University of Jammu, Jammu	The triangle of relationship between human beings, animals and plants has existed for ages, and has given rise to intense-relationships and consequently rich traditions of ethnoveterinary knowledge throughout the world. The predominantly rural population	Conservation; Informant consensus factor; Traditional healers; Use-value; Women participation	herbaceous agent; animal disease; Apiaceae; article; Asteraceae; Azadirachta indica; Brassica campestris; buffalo; cattle; consensus; Curcuma longa; Emblica officinalis; Fabaceae; flora; goat; India; information; interview; Liliaceae; medicinal plant; Mel		Plant Preparations; Veterinary Drugs				Amorozo, M.C.M., Uso e diversidade de plantas medicinais em Santo Antônio de Leverger, MT, Brasil (2002) Acta Botânica Brasílica, 16, pp. 189-203; Ashutosh, S., Pandey, S., Kaur, T., Bajpai, R.K., Knowledge based remote sensing and GIS approach for forest	Manhas, R.K.; Department of Botany, Govt. Degree College, Kathua 184104, Jammu and Kashmir, India; email: manhasrk@rediffmail.com								3788741		JOETD	10.1016/j.jep.2012.02.027	22366093	English	J. Ethnopharmacol.	Article	Scopus	LSP disease
Mithrasena Y.J.P.K., Wijesundera W.S.S., Wijesundera R.L.C., Wimalasiri D.C., Priyanthi R.P.N.	Pathogenic and Genetic Diversity of Magneporthe oryzae Populations from Sri Lanka	2012	Rice Science	19	3		241	246			http://www.scopus.com/inward/record.url?eid=2-s2.0-84867129736&partnerID=40&md5=578adadf04882072ac0a08b20bf8ce09	Rice Research Centre, Bombuwela, Kalutara 12024, Sri Lanka; Department of Biochemistry and Molecular Biology, Faculty of Medicine, University of Colombo, Colombo 00080, Sri Lanka; Department of Plant Sciences, Faculty of Science, University of Colombo, Co	Mithrasena, Y.J.P.K., Rice Research Centre, Bombuwela, Kalutara 12024, Sri Lanka; Wijesundera, W.S.S., Department of Biochemistry and Molecular Biology, Faculty of Medicine, University of Colombo, Colombo 00080, Sri Lanka; Wijesundera, R.L.C., Department	The present study was undertaken to determine the pathogenic and the genetic diversity of the isolates of M. oryzae collected from the wet, intermediate and dry zones of Sri Lanka with a view to develop rice varieties conferring durable resistance to rice	Genetic diversity; Pathotype; Rice blast	Fungi						Bonman, J.M., Khush, G.S., Nelson, R.J., Breeding rice for resistance to pests (1992) Annu Rev Phytopathol, 30, pp. 507-528; Dissanayake, D.M.N., Significance of multilocational screening for durable resistance to blast disease in rice (1998) Trop Agric,	Wijesundera, R.L.C.; Department of Plant Sciences, Faculty of Science, University of Colombo, Colombo 00030, Sri Lanka; email: ravi@pts.cmb.ac.lk								16726308			10.1016/S1672-6308(12)60046-8		English	Rice Sci.	Article	Scopus	LSP disease
Madhan Mohan K., Sheshu Madhav M., Srinivas Prasad M., Rama Devi S.J.S., Ram Kumar G., Viraktamath B.C.	Analysis of population structure of Magnaporthe grisea using genome specific microsatellite markers	2012	Current Trends in Biotechnology and Pharmacy	6	2		173	182			http://www.scopus.com/inward/record.url?eid=2-s2.0-84860193618&partnerID=40&md5=b527ee0a77152f4d665d1bc1a3a13584	Department of Plant Pathology, Directorate of Rice Research, Crop Protection Division, Rajendranagar, Hyderabad, Andhra Pradesh 500030, India; Department of Biotechnology, Directorate of Rice Research, Crop Improvement Division, Rajendranagar, Hyderabad,	Madhan Mohan, K., Department of Plant Pathology, Directorate of Rice Research, Crop Protection Division, Rajendranagar, Hyderabad, Andhra Pradesh 500030, India; Sheshu Madhav, M., Department of Biotechnology, Directorate of Rice Research, Crop Improvement	In order to understand the pathogen's genetic diversity and dynamics of fungal populations, 34 rice blast isolates collected from various blast endemic areas of India were analyzed using Magnaporthe grisea genome specific microsatellite markers (MGM) and	Avr genes; Blast resistance genes; Cultivars; Pathosystem; Repetitive DNA sequences	fungal DNA; article; AVR Pi 2 gene; AVR Pi 4 gene; AVR Pi gene; cluster analysis; controlled study; crossover procedure; DNA fingerprinting; fungal gene; genetic improvement; genetic susceptibility; genetic variability; India; Magnaporthe grisea; microsat						Lavanya, B., Gnanamanickam, S.S., Molecular tools for characterization of rice blast pathogen (Magnaporthe grisea) population and molecular markerassisted breeding for disease resistance (2000) Cur Sci, 78 (3), pp. 248-257; Sesma, A., Osbourn, A.E., The r	Madhan Mohan, K.; Department of Plant Pathology, Directorate of Rice Research, Crop Protection Division, Rajendranagar, Hyderabad, Andhra Pradesh 500030, India; email: madanmohan.kolluru@gmail.com								9738916					English	Curr. Trends Biotechnol. Pharm.	Article	Scopus	LSP disease
Ghaley B.B., Christiansen J.L., Andersen S.B.	Genetic diversity in blast resistance of Bhutan rice landraces	2012	Euphytica	184	1		119	130		1	http://www.scopus.com/inward/record.url?eid=2-s2.0-84856713077&partnerID=40&md5=e8a2252e10501a1bec53aa764fe6b424	Renewable Natural Resources Research Centre, Council for Renewable Natural Resources Research of Bhutan, Ministry of Agriculture, Yusipang, Bhutan; Department of Agriculture and Ecology, Crop Science Section, Faculty of Life Sciences, University of Copenh	Ghaley, B.B., Renewable Natural Resources Research Centre, Council for Renewable Natural Resources Research of Bhutan, Ministry of Agriculture, Yusipang, Bhutan, Department of Agriculture and Ecology, Crop Science Section, Faculty of Life Sciences, Univer	With an objective to evaluate the Bhutan rice (Oryza sativa L.) landraces for genetic diversity in blast resistance, 402 accessions viz. 352 landraces, a differential set of 32 R gene lines and 18 modern cultivars were field-evaluated in three blast 'hots	Blast resistance; Field evaluation; Genetic diversity; Monogenic lines; Oryza sativa L.; SSR markers	Oryza sativa						Bajracharya, J., Rana, R.B., Gauchan, D., Sthapit, B.R., Jarvis, D.I., Witcombe, J.R., Rice landrace diversity in Nepal, socio-economic and ecological factors determining rice landrace diversity in three agro-ecozones of Nepal based on farm surveys (2010)	Ghaley, B. B.; Department of Agriculture and Ecology, Crop Science Section, Faculty of Life Sciences, University of Copenhagen, Højbakkegård Allé 13, 2630 Taastrup, Denmark; email: bbg@life.ku.dk								142336		EUPHA	10.1007/s10681-011-0582-z		English	Euphytica	Article	Scopus	LSP disease
Mahender A., Swain D.M., Gitishree D., Subudhi H.N., Rao G.J.N.	Molecular analysis of native Manipur rice accessions for resistance against blast	2012	African Journal of Biotechnology	11	6		1321	1329		2	http://www.scopus.com/inward/record.url?eid=2-s2.0-84856206192&partnerID=40&md5=1b0c45d37fd02dd2ae8754b017a646d5	Division of Crop Improvement, Central Rice Research Institute, Cuttack-753006, India	Mahender, A., Division of Crop Improvement, Central Rice Research Institute, Cuttack-753006, India; Swain, D.M., Division of Crop Improvement, Central Rice Research Institute, Cuttack-753006, India; Gitishree, D., Division of Crop Improvement, Central Ric	The genetic diversity for resistance against blast, a major disease on rice, was assessed in the land race collections of Manipur, India, a region reported to be associated with origin of rice. The presence of eight well characterized genes, that is Pi-b,	Blast disease; Gene; Genetic diversity; Manipur	agricultural land; article; breeding; disease resistance; gene transfer; genetic marker; genetic variability; incidence; India; molecular genetics; nonhuman; Pi 40 gene; Pi 5 gene; Pi 9 gene; Pi a gene; Pi b gene; Pi ta gene; Pi z gene; Piz t gene; plant						Bonman, J.M., Mackill, D.J., Durable resistance to rice blast (1988) Oryza, 25, pp. 103-110; Bryan, G.T., Wu, K.S., Farall, L., Jia, Y.L., Hershey, H.P., McAdams, S.A., Faulk, K.N., Valent, B., A single amino acid difference distinguishes resistant and su	Rao, G. J. N.; Division of Crop Improvement, Central Rice Research Institute, Cuttack-753006, India; email: raogjn@yahoo.com								16845315			10.5897/AJB11.2178		English	Afr. J. Biotechnol.	Article	Scopus	LSP disease
Jayaprakashvel M., Mathivanan N.	Morphological and pathological variations of rice sheath blight inciting south Indian Rhizoctonia solani isolates	2012	Archives of Phytopathology and Plant Protection	45	4		455	467			http://www.scopus.com/inward/record.url?eid=2-s2.0-84857331831&partnerID=40&md5=74b4d457a1a4aaafb84548ba3bcb5359	Biocontrol and Microbial Metabolites Lab, Centre for Advanced Studies in Botany, University of Madras, Guindy Campus, Chennai, 600025, India	Jayaprakashvel, M., Biocontrol and Microbial Metabolites Lab, Centre for Advanced Studies in Botany, University of Madras, Guindy Campus, Chennai, 600025, India; Mathivanan, N., Biocontrol and Microbial Metabolites Lab, Centre for Advanced Studies in Bota	Frequent assessment of pathogen diversity is one of the most important criteria in designing disease management programmes. A study on diversity of field isolates of Rhizoctonia solani from sheath blight-infected rice fields of south India has been carrie	morphological diversity; pathogenic variation; Rhizoctonia solani; rice cultivars; sclerotia; sheath blight	Hyphomycetes; Thanatephorus cucumeris						(1994) Statistical software version 3.01, , Agres Boston (USA): Pascal International Software Solutions; Anderson, N.A., The genetics and pathology of Rhizoctonia solani (1982) Ann Rev Phytopathol, 20, pp. 329-347; Baker, K.F., Rhizoctonia solani: biology	Mathivanan, N.; Biocontrol and Microbial Metabolites Lab, Centre for Advanced Studies in Botany, University of Madras, Guindy Campus, Chennai, 600025, India; email: prabhamathi@yahoo.com								3235408			10.1080/03235408.2011.587983		English	Arch. Phytopathol. Plant Prot.	Article	Scopus	LSP disease
Khan J.A., Arshad H.M.I., Saleem K., Sandhu A.F., Hasnain S., Babar M.M.	Evaluation of resistance genes in rice against local isolates of Xanthomonas oryzae pv. oryzae in Punjab Province of Pakistan	2012	Archives of Phytopathology and Plant Protection	45	15		1826	1839		1	http://www.scopus.com/inward/record.url?eid=2-s2.0-84866024144&partnerID=40&md5=25e3b414eb80c78e440c4c0c127b4289	Plant Protection Division, Nuclear Institute for Agriculture and Biology (NIAB), PO Box 128, Jhang Road, Faisalabad, Pakistan; Department of Microbiology and Molecular Genetics, University of the Punjab, Lahore, Pakistan	Khan, J.A., Plant Protection Division, Nuclear Institute for Agriculture and Biology (NIAB), PO Box 128, Jhang Road, Faisalabad, Pakistan; Arshad, H.M.I., Plant Protection Division, Nuclear Institute for Agriculture and Biology (NIAB), PO Box 128, Jhang R	Absence of resistance/tolerance against bacterial leaf blight (BLB), incited by Xanthomonas oryzae pv. oryzae, in famous basmati varieties is one of the main reason for BLB epidemic in Punjab in 2007-2008. For developing resistance against BLB, the respon	BLB; BLB resistant genes; rice NILs; rice pyramids; Xa genes	Bacteria (microorganisms); Xanthomonas oryzae; Xanthomonas oryzae pv. oryzae						Abbasi, F.M., Masood, R., Ahmad, H., Khan, U., Afzal, M., Inamullah, Rehman, M.U., Khan, M.A., Molecular screening of Pakistani rice germplasm for xa5 gene resistance to bacterial blight (2011) Afr J Biotechnol, 10, pp. 2833-2837; Adhikari, T.B., Basnyat,	Saleem, K.; Plant Protection Division, Nuclear Institute for Agriculture and Biology (NIAB), PO Box 128, Jhang Road, Faisalabad, Pakistan; email: kammmran@hotmail.com								3235408			10.1080/03235408.2012.712830		English	Arch. Phytopathol. Plant Prot.	Article	Scopus	LSP disease
Jabeen R., Iftikhar T., Batool H.	Isolation, characterization, preservation and pathogenicity test of Xanthomonas Oryzae PV. Oryzae causing BLB disease in Rice	2012	Pakistan Journal of Botany	44	1		261	265		1	http://www.scopus.com/inward/record.url?eid=2-s2.0-84871703355&partnerID=40&md5=3b341da3d4f9e3542c7d70bb995efd91	Department of Plant Sciences SBKW University, Quetta, Pakistan; Department of Botany, G.C. University Faisalabad, Pakistan	Jabeen, R., Department of Plant Sciences SBKW University, Quetta, Pakistan; Iftikhar, T., Department of Botany, G.C. University Faisalabad, Pakistan; Batool, H., Department of Plant Sciences SBKW University, Quetta, Pakistan	The present study was conducted to isolate the Xanthomonas oryzae pv. oryzae obtained from infected rice foliar samples collected from all agro ecological zones of Pakistan. Infected leaf samples when plated gave yellow, circular, smooth, convex and visco		Bacteria (microorganisms); Negibacteria; Nicotiana; Nicotiana rustica; Nicotiana tabacum; Xanthomonas oryzae pv. oryzae						Akhtar, M.A., (2003) Study On Genetic Variation In Xanthomonas Oryzae Pv. Oryzae In Relation to Resistance In Rice, p. 10. , 1st Annual Progress Report. Institute of Plant and Environmental Protection, NARC, Islamabad, Pakistan; Akhtar, M.A., Rafi, A., Ha	Iftikhar, T.; Department of Botany, G.C. University FaisalabadPakistan; email: pakaim2001@yahoo.com								5563321					English	Pak. J. Bot.	Article	Scopus	LSP disease
Sharma U.K., Pegu S., Hazarika D., Das A.	Medico-religious plants used by the Hajong community of Assam, India	2012	Journal of Ethnopharmacology	143	3		787	800		1	http://www.scopus.com/inward/record.url?eid=2-s2.0-84866730380&partnerID=40&md5=23b3f9b70edf08e85226e01d765583b2	Department of Botany, Dhemaji College, Dhemaji Station Road, Dhemaji, Assam 787057, India; Department of Economics, Dhemaji College, Dhemaji, Assam 787057, India; Silapathar Science College, Silapathar, Dhemaji District, Assam 787059, India	Sharma, U.K., Department of Botany, Dhemaji College, Dhemaji Station Road, Dhemaji, Assam 787057, India; Pegu, S., Department of Botany, Dhemaji College, Dhemaji Station Road, Dhemaji, Assam 787057, India; Hazarika, D., Department of Economics, Dhemaji Co	Ethnopharmacological relevance: The Hajong people use many medicinal plants in their different rituals. The information generated from the present study regarding the medico-religious plants used by the Hajong tribes need a thorough phytochemical investig	Assam; Conservation; Ethno medico-religious; Hajong; Traditional knowledge	Aegle marmelos extract; analgesic agent; antianemic agent; antiasthmatic agent; anticonvulsive agent; antidiarrheal agent; antihypertensive agent; antirheumatic agent; Bombax ceiba extract; cannabis; Citrus grandis extract; Cynodon dactylon extract; derma		cannabis, 8001-45-4, 8063-14-7; Plant Preparations				Aizhong, L., Shengji, P., Sanyang, C., Plant worship of the Yi people in Chuxiong of Yunnan, China (1999) Ethnobotany, 11, pp. 1-8; Borah, S., Das, A.K., Boruah, A.M., Borah, J., Ethnomedicinal plants used by the Mishing communities for analgesic and anti	Sharma, U.K.; Department of Botany, Dhemaji College, Dhemaji Station Road, Dhemaji, Assam 787057, India; email: usharma2@rediffmail.com								3788741		JOETD	10.1016/j.jep.2012.06.053	23010157	English	J. Ethnopharmacol.	Article	Scopus	LSP disease, biodiversity
Selim S.	Labour productivity and rice production in Bangladesh: A stochastic frontier approach	2012	Applied Economics	44	5		641	652			http://www.scopus.com/inward/record.url?eid=2-s2.0-80051629917&partnerID=40&md5=c54d80b98cbf44ed177e9b1cc76d17bb	Cardiff Business School, Cardiff University, Aberconway, Colum Drive, Cardiff CF10 3EU, United Kingdom	Selim, S., Cardiff Business School, Cardiff University, Aberconway, Colum Drive, Cardiff CF10 3EU, United Kingdom	In this article, we examine the significance of labour productivity and use of inputs in explaining technical efficiency of rice production in Bangladesh. We find that higher labour productivity can stimulate high efficiency gains, but increased use of in		agricultural labor; agricultural policy; crop production; labor market; labor productivity; policy reform; rice; stochasticity; Bangladesh						Aigner, D.J., Lovell, C.K., Schmidt, P., Formulation and estimation of stochastic frontier production function models (1977) Journal of Econometrics, 6, pp. 21-37; Baffes, J., Gautam, M., (1996) Is growth in Bangladesh's rice production sustainable?, , Po	Selim, S.; Cardiff Business School, Cardiff University, Aberconway, Colum Drive, Cardiff CF10 3EU, United Kingdom; email: selimst@cardiff.ac.uk								36846			10.1080/00036846.2010.515203		English	Appl. Econ.	Article	Scopus	Market, food security
Chen C.-C., McCarl B., Chang C.-C.	Climate change, sea level rise and rice: Global market implications	2012	Climatic Change	110	2014-03-04		543	560		3	http://www.scopus.com/inward/record.url?eid=2-s2.0-84862928513&partnerID=40&md5=c16b9a008639c086e6a660a06c9c9217	Department of Applied Economics, National Chung Hsing University, #250 Kuo-Kuang Road, Taichung, Taiwan; Department of Agricultural Economics, Texas AandM University, College Station, TX 77843-2124, United States; Institute of Economics, Academia Sinica,	Chen, C.-C., Department of Applied Economics, National Chung Hsing University, #250 Kuo-Kuang Road, Taichung, Taiwan; McCarl, B., Department of Agricultural Economics, Texas AandM University, College Station, TX 77843-2124, United States; Chang, C.-C., In	Climate change will influence yields while sea level rise can inundate producing lands. The research reported investigates the individual and simultaneous effects of these factors on production, trade and consumption of rice the world's number one food cr		Bangladesh; Food crops; Food security; Global market; Myanmars; Policy implications; Price increase; Rice production; Risk factors; Sea level rise; Technical progress; Viet Nam; Food supply; International trade; Public policy; Sea level; Climate change; c						Bindoff, N.L., Wellebr, J., Artale, V., Cazenave, A., Gregory, J.M., Gulev, S., Hanawa, K., Unnikrishnan, A.S., Observations: Oceanic Climate Change and Sea Level (2007) Climate change 2007: The physical science basis, , Contribution of working group I to	McCarl, B.; Department of Agricultural Economics, Texas A and M University, College Station, TX 77843-2124, United States; email: mccarl@tamu.edu								1650009		CLCHD	10.1007/s10584-011-0074-0		English	Clim. Change	Article	Scopus	Market, food security
Chibbar R.N., Dass S.	Crop improvement for enhanced grain quality and utilization	2012	Quality Assurance and Safety of Crops and Foods	4	3		116	118			http://www.scopus.com/inward/record.url?eid=2-s2.0-84870352185&partnerID=40&md5=0ead803d452b4f9fdc8474d1914a66aa	Department of Plant Sciences, University of Saskatchewan, Saskatoon, S7N 5A8, Canada; Indian Maize Development Association, New Delhi, India	Chibbar, R.N., Department of Plant Sciences, University of Saskatchewan, Saskatoon, S7N 5A8, Canada; Dass, S., Indian Maize Development Association, New Delhi, India	Cereal grain based foods are very diverse, ethnically determined, and influenced by concentration and composition of grain constituents. It is now well recognized that grains based food products in addition to meeting the calorific requirements should als	Health benefits; Maize; Marker assisted selection; Micronutrients; Millet; Rice; Transgenic technology; Wheat	Triticum aestivum; Zea mays							Chibbar, R.N.; Department of Plant Sciences, University of Saskatchewan, Saskatoon, S7N 5A8, Canada; email: ravi.chibbar@usask.ca								17578361			10.1111/j.1757-837X.2012.00134.x		English	Qual. Assur. Saf. Crops Foods	Article	Scopus	Micronutrient
Boussalis C., Nelson H.T., Swaminathan S.	Towards comprehensive malaria planning: The effect of government capacity, health policy, and land use variables on malaria incidence in India	2012	Social Science and Medicine	75	7		1213	1221		3	http://www.scopus.com/inward/record.url?eid=2-s2.0-84864324367&partnerID=40&md5=1deafb07ce17d2d34edd05206fd89662	Harvard Law School, Cambridge, MA 02138, United States; Claremont Graduate University, United States; Institute for Social and Economic Change, Bangalore, India	Boussalis, C., Harvard Law School, Cambridge, MA 02138, United States; Nelson, H.T., Claremont Graduate University, United States; Swaminathan, S., Institute for Social and Economic Change, Bangalore, India	We present what we believe is the first empirical research that accounts for subnational government capacity in estimating malaria incidence. After controlling for relevant extrinsic factors, we find evidence of a negative effect of state government capac	India; Land use; Malaria risk; Political capacity; Rice production; Vector-borne disease	crop production; economic development; empirical analysis; government relations; health impact; health policy; health risk; land use; malaria; public health; public spending; article; crop production; economic development; environmental factor; government						Achen, C.H., (2000) Why lagged dependent variables can suppress the explanatory power of other independent variables, , Society for Political Methodology, St. Louis, WA; Adger, W.N., (2004) New indicators of vulnerability and adaptive capacity, , Technica	Boussalis, C.; Harvard Law School, Cambridge, MA 02138, United States; email: cboussalis@law.harvard.edu								2779536		SSMDE	10.1016/j.socscimed.2012.05.023	22770486	English	Soc. Sci. Med.	Article	Scopus	Natural resource management
Mondal S., Bandyopadhyay S., Ghosh M.K., Mukhopadhyay S., Roy S., Mandal C.	Natural products: Promising resources for cancer drug discovery	2012	Anti-Cancer Agents in Medicinal Chemistry	12	1		49	75		11	http://www.scopus.com/inward/record.url?eid=2-s2.0-84855281811&partnerID=40&md5=9309539d0e915b3549123da94a001a20	Cancer and Cell Biology Council of Scientific and Industrial Research, Indian Institute of Chemical Biology, 4, Raja S.C. Mullick Road, Kolkata-700 032, India; Chemistry Council of Scientific and Industrial Research, Indian Institute of Chemical Biology,	Mondal, S., Cancer and Cell Biology Council of Scientific and Industrial Research, Indian Institute of Chemical Biology, 4, Raja S.C. Mullick Road, Kolkata-700 032, India; Bandyopadhyay, S., Cancer and Cell Biology Council of Scientific and Industrial Res	Natural products are important sources of anti-cancer lead molecules. Many successful anti-cancer drugs are natural products or their analogues. Many more are under clinical trials. The present review focuses on chemopreventive and anti-cancer activities	Apoptosis; Chemoprevention; Immunotherapy; Lead molecule; Medicinal plants	Acacia concinna extract; Acacia nilotica extract; Aegle marmelos extract; Aloe vera extract; Alstonia scholaris extract; antineoplastic agent; Azadirachta indica extract; Berberis aristata extract; Boswellia serrata extract; butea monosperma extract; Calo		Anticarcinogenic Agents; Antineoplastic Agents, Phytogenic; Biological Agents; Plant Extracts				Parkin, D.M., Bray, F., Ferlay, J., Pisani, P., Global Cancer Statistics, 2002 (2005) CA. Cancer. J. Clin., 55, pp. 74-108; Ferlay, J., Shin, H.R., Bray, F., Forman, D., Mathers, C., Parkin, D.M., Estimates of worldwide burden of cancer in 2008: GLOBOCAN																		Natural resource management
Mattsson E., Persson U.M., Ostwald M., Nissanka S.P.	REDD+ readiness implications for Sri Lanka in terms of reducing deforestation	2012	Journal of Environmental Management	100			29	40		2	http://www.scopus.com/inward/record.url?eid=2-s2.0-84857134504&partnerID=40&md5=eb87f0a242e77b65a39b71eb262064c4	Department of Earth Sciences, University of Gothenburg, Sweden. Box 460, 405 30 Göteborg, Sweden; Gothenburg Centre of Globalization and Development, Department of Economics, University of Gothenburg, Box 640, 405 30 Göteborg, Sweden; Division of Physical	Mattsson, E., Department of Earth Sciences, University of Gothenburg, Sweden. Box 460, 405 30 Göteborg, Sweden; Persson, U.M., Gothenburg Centre of Globalization and Development, Department of Economics, University of Gothenburg, Box 640, 405 30 Göteborg,	Any system to compensate countries for reduced emissions from deforestation and forest degradation (REDD+) requires a historical reference level against which future performance can be measured. Here we examine the possibilities Sri Lanka, a small forest	Carbon stock; Deforestation; Forest inventories; REDD+; Sri LankaOpportunity cost	carbon; biogenic emission; clearcutting; conservation management; cost-benefit analysis; data set; deforestation; emission control; environmental economics; forest inventory; historical record; incentive; rainfed agriculture; rice; sustainability; tea; ag		carbon, 7440-44-0				Achard, F., Eva, H.D., Mayaux, P., Stibig, H.-J., Belward, A., Improved estimates of net carbon emissions from land cover change in the tropics for the 1990s (2004) Glob. Biogeochem. Cycles, 18, pp. GB2008; (2010) Department of Census and Statistics, , ht	Mattsson, E.; Department of Earth Sciences, University of Gothenburg, Sweden, Box 460, 405 30 Göteborg, Sweden; email: eskil@gvc.gu.se								3014797		JEVMA	10.1016/j.jenvman.2012.01.018	22361108	English	J. Environ. Manage.	Article	Scopus	Natural resource management, ecosystems
Ahmed N., Muir J.F., Garnett S.T.	Bangladesh needs a "blue-green revolution" to achieve a green economy	2012	Ambio	41	2		211	215		2	http://www.scopus.com/inward/record.url?eid=2-s2.0-84859932633&partnerID=40&md5=cad3041b0a3d7592b466324ceb4a381c	Department of Fisheries Management, Bangladesh Agricultural University, Mymensingh 2202, Bangladesh; Institute of Aquaculture, University of Stirling, Stirling FK9 4LA, United Kingdom; Research Institute for Environment and Livelihoods, Charles Darwin Uni	Ahmed, N., Department of Fisheries Management, Bangladesh Agricultural University, Mymensingh 2202, Bangladesh; Muir, J.F., Institute of Aquaculture, University of Stirling, Stirling FK9 4LA, United Kingdom; Garnett, S.T., Research Institute for Environme	[No abstract available]		aquaculture production; carrying capacity; climate effect; economic growth; environmental management; food production; food security; green revolution; income distribution; malnutrition; national economy; population density; prawn culture; rice; socioecon						Ahmed, N., Garnett, S.T., Integrated rice-fish farming in Bangladesh: Meeting the challenges of food security (2011) Food Security, 3, pp. 81-92. , 10.1007/s12571-011-0113-8; Ahmed, N., Allison, E.H., Muir, J.F., Rice-fields to prawn farms: A blue revolut	Ahmed, N.; Department of Fisheries Management, Bangladesh Agricultural University, Mymensingh 2202, Bangladesh; email: nesar_2000@yahoo.com								447447		AMBOC	10.1007/s13280-011-0160-6	22396101	English	Ambio	Article	Scopus	Natural resource management, food security
Rahman M.M., Rahman M.A., Maki T., Hasegawa H.	Phytotoxicity of arsenate and salinity on early seedling growth of rice (oryza sativa l.): A threat to sustainable rice cultivation in South and South-East Asia	2012	Bulletin of Environmental Contamination and Toxicology	88	5		695	702		1	http://www.scopus.com/inward/record.url?eid=2-s2.0-84861312937&partnerID=40&md5=b625e89b622e3350272e293e74590264	Graduate School of Natural Science and Technology, Kanazawa University, Kakuma, Kanazawa 920-1192, Japan; Bangladesh Rice Research Institute (BRRI), Sonagazi, Feni 3930, Bangladesh; Faculty of Science, School of the Environment, University of Technology S	Rahman, M.M., Graduate School of Natural Science and Technology, Kanazawa University, Kakuma, Kanazawa 920-1192, Japan; Rahman, M.A., Bangladesh Rice Research Institute (BRRI), Sonagazi, Feni 3930, Bangladesh, Faculty of Science, School of the Environment	Arsenic (As) contamination is an important environmental consequence in some parts of salinity-affected South (S) and South-East (SE) Asia. In this study, we investigated the individual and combined phytotoxicity of arsenic (As) [arsenate; As(V)] and sali	Arsenic; Phytotoxicity; Rice; Salinity	arsenic acid derivative; ground water; agriculture; article; Bangladesh; chemistry; drug effect; environmental protection; germination; growth, development and aging; methodology; physiology; rice; salinity; seedling; soil; soil pollutant; Southeast Asia;		Arsenates; Soil; Soil Pollutants				Abedin, M.J., Meharg, A.A., Relative toxicity of arsenite and arsenate on germination and early seedling growth of rice (Oryza sativa L.) (2002) Plant Soil, 243, pp. 57-66; Asaduzzaman, M., Hasanuzzaman, M., Hasan, M.A., Sultana, S., Seed germination and	Rahman, M.M.; Graduate School of Natural Science and Technology, Kanazawa University, Kakuma, Kanazawa 920-1192, Japan; email: rahmanmmamunur@gmail.com								74861		BECTA	10.1007/s00128-012-0580-4		English	Bull. Environ. Contam. Toxicol.	Article	Scopus	Natural resource management, sustainability
Mahajan G., Timsina J., Jhanji S., Sekhon N.K., Kuldeep-Singh	Cultivar Response, Dry-Matter Partitioning, and Nitrogen-Use Efficiency in Dry Direct-Seeded Rice in Northwest India	2012	Journal of Crop Improvement	26	6		767	790			http://www.scopus.com/inward/record.url?eid=2-s2.0-84869748582&partnerID=40&md5=3175f62b5612a41d7cd6e7e040bd6ef4	Rice Section, Department of Plant Breeding and Genetics, Punjab Agricultural University, Ludhiana 141004, India; International Rice Research Institute, Los Banos, Laguna, Philippines	Mahajan, G., Rice Section, Department of Plant Breeding and Genetics, Punjab Agricultural University, Ludhiana 141004, India; Timsina, J., International Rice Research Institute, Los Banos, Laguna, Philippines; Jhanji, S., Rice Section, Department of Plant	Dry-seeded rice (Oryza sativa L.) (DSR) is an emerging production system in the Indo-Gangetic Plains because of increasing constraints of labor, water, and energy availability. Studies on dry-matter partitioning and nitrogen-use efficiency (ANUE) are part	aerobic rice; nitrogen-use indices; nitrogen-use-efficient cultivars; root density; SPAD index	Oryza sativa						Balasubramanian, V., Hill, J.E., Direct seeding of rice in Asia: Emerging issues and strategic research needs for the 21st century (2002) Direct seeding: Research strategies and opportunities, pp. 15-39. , In: Pandey S., editors Los Banos, Philippines, Lo	Mahajan, G.; Rice Section, Department of Plant Breeding and Genetics, Punjab Agricultural University, Ludhiana 141004, India; email: mahajangulshan@rediffmail.com								15427528			10.1080/15427528.2012.686473		English	J. Crop Improv.	Article	Scopus	nitrogen
Dar S.R., Thomas T., Dagar J.C., Lal K., Mehboob S., Bakshi M.R., Mir A.H., Mir H., Kumar A., Malik R.K.	Effect of fertilizer nitrogen and varied C:N ratio of mushroom compost on rice yield and nitrogen forms of soil	2012	Journal of Food, Agriculture and Environment	10	2014-03-04		423	427			http://www.scopus.com/inward/record.url?eid=2-s2.0-84869143467&partnerID=40&md5=a63149f988f8419f0464b340b05066c6	International Rice Research Institute (EUPH India), CG Block NASC Complex, DPS Marg-Pusa, New Delhi-110012, India; Allahabad Agricultural Institute Deemed University (Christian Minority University), Allahabad, Utarpardesh, India-211001, India; Indian Coun	Dar, S.R., International Rice Research Institute (EUPH India), CG Block NASC Complex, DPS Marg-Pusa, New Delhi-110012, India; Thomas, T., Allahabad Agricultural Institute Deemed University (Christian Minority University), Allahabad, Utarpardesh, India-211	Field experiment was conducted to evaluate effect of spent mushroom composts of varied C:N ratio with and without fertilizer nitrogen on yield, nitrogen uptake and nitrogen forms in rice grown on the Inceptisol of Allahabad. Nitrogen mineralization from o	C:N ratio; Compost; Mineral and hydrolysable nitrogen; Mineral fertilizer nitrogen	amino acid; aminosugar; ammonia; carbon; nitrogen; article; carbon nitrogen ratio; India; mushroom; nitrogen mineralization; nitrogen uptake; rice; Basidiomycota; Ostreidae		amino acid, 65072-01-7; ammonia, 14798-03-9, 51847-23-5, 7664-41-7; carbon, 7440-44-0; nitrogen, 7727-37-9				Aulakh, M.S., Pasricha, N.S., Fertilizer nitrogen management and environment pollution-Indian Scenario (1997) Plant Nutrient Needs, Supply Efficiency and Policy Issues: 2000-2025, pp. 296-313. , In: Kanwar, J. S. and Katyal, J. C. (eds), National Academy	Dar, S. R.; International Rice Research Institute (EUPH India), CG Block NASC Complex, DPS Marg-Pusa, New Delhi-110012, India; email: darshahnawaz78@rediffmail.com								14590255					English	J. Food Agric. Environ.	Article	Scopus	nitrogen
Ehsanullah, Jabran K., Asghar G., Hussain M., Rafiq M.	Effect of nitrogen fertilization and seedling density on fine rice yield in Faisalabad, Pakistan	2012	Soil and Environment	31	2		152	156			http://www.scopus.com/inward/record.url?eid=2-s2.0-84869186254&partnerID=40&md5=683f88bf5291a47101128cca1d4aff6e	Department of Agronomy, University of Agriculture, Faisalabad, Pakistan; Ayub Agricultural Research Institute, Faisalabad, Pakistan; College of Agriculture, Bahauddin Zakariya University, Multan, Pakistan	Ehsanullah, Department of Agronomy, University of Agriculture, Faisalabad, Pakistan; Jabran, K., Department of Agronomy, University of Agriculture, Faisalabad, Pakistan, Ayub Agricultural Research Institute, Faisalabad, Pakistan; Asghar, G., Department of	Rice seedlings density per hill and optimal nitrogen fertilization exercises a strong influence on rice growth and grain yield due to competitive effects both on the vegetative and reproductive development. Present study was conducted to explore the possi	Nitrogen levels; Rice; Seedlings density; Yield							Ahmad, S., Hussain, A., Ali, H., Ahmad, A., Grain yield of transplanted rice (Oryza sativa L.) as influenced by plant density and nitrogen fertilization (2005) Journal of Agriculture and Social Sciences, 1, pp. 212-215; Ahmad, C.M., Bhinder, G.M.S., Akhta	Jabran, K.; Department of Agronomy, University of Agriculture, Faisalabad, Pakistan; email: khawarjabran@gmail.com								20749546					English	Soil Environ.	Article	Scopus	nitrogen
Ghaley B.B.	Uptake and utilization of 5-split nitrogen topdressing in an improved and a traditional rice cultivar in the bhutan highlands	2012	Experimental Agriculture	48	4		536	550		1	http://www.scopus.com/inward/record.url?eid=2-s2.0-84865994125&partnerID=40&md5=6a032eadc96ee8a163e9d98d78802be1	Renewable Natural Resources Research Centre, Yusipang, Council for Renewable Natural Resources Research of Bhutan, Ministry of Agriculture, Bhutan; Department of Plant and Environmental Science, Faculty of Science, University of Copenhagen, Højbakkegård A	Ghaley, B.B., Renewable Natural Resources Research Centre, Yusipang, Council for Renewable Natural Resources Research of Bhutan, Ministry of Agriculture, Bhutan, Department of Plant and Environmental Science, Faculty of Science, University of Copenhagen,	The uptake of urea fertilizer (NDFF), applied with 150kg nitrogen (N) ha-1, topdressed in five splits of 30kg N ha-1 (30 N) each at 7, 26, 45, 70 and 83 days after transplanting (DAT) of rice (Oryza sativa L.), was investigated in an improved (Khangma Maa		Oryza sativa						Adhikari, C., Bronson, K.F., Panuallah, G.M., Regmi, A.P., Saha, P.K., Dobermann, A., Olk, D.C., Pasuquin, E., On-farm soil N supply and N nutrition in the rice-wheat system of Nepal and Bangladesh (1999) Field Crops Research, 64, pp. 273-286; Atlin, G.N.	Ghaley, B.B.; Department of Plant and Environmental Science, Faculty of Science, University of Copenhagen, Højbakkegård Allé 30, DK-2630 Taastrup, Denmark; email: bbg@life.ku.dk								144797		EXAGA	10.1017/S0014479712000440		English	Exp. Agric.	Article	Scopus	nitrogen
Akoijam C., Singh A.K., Rai A.N.	Characterization of free-living cyanobacterial strains and their competence to colonize rice roots	2012	Biology and Fertility of Soils	48	6		679	687			http://www.scopus.com/inward/record.url?eid=2-s2.0-84864393011&partnerID=40&md5=e2d52d36f6051bc4d41859ac21274ac1	Department of Biochemistry, North-Eastern Hill University, Shillong 793022 Meghalaya, India	Akoijam, C., Department of Biochemistry, North-Eastern Hill University, Shillong 793022 Meghalaya, India; Singh, A.K., Department of Biochemistry, North-Eastern Hill University, Shillong 793022 Meghalaya, India; Rai, A.N., Department of Biochemistry, Nort	A total of 45 cyanobacterial strains isolated from rice fields near Loktak Lake in Manipur, India were tested for their rice root colonization capacity under light and under darkness. Twenty-one of these strains showed significant colonization of rice roo	16S rRNA gene; Anabaena; Biofertilizer; DGGE; Nostoc	biofertilizer; cyanobacterium; electrokinesis; interspecific competition; light availability; light effect; nitrogen; paddy field; phylogenetics; root colonization; India; Loktak Lake; Manipur; Anabaena; Cyanobacteria; Nostoc						Bennett, A., Bogorad, L., Complementary chromatic adaptation in filamentous blue green algae (1973) J Cell Biol, 58, pp. 419-435; Bouldin, D.R., The chemistry and biology of flooded soils in relation to the nitrogen economy in rice fields (1986) Nitrogen	Singh, A. K.; Department of Biochemistry, North-Eastern Hill University, Shillong 793022 Meghalaya, India; email: aksingh_nehu@yahoo.co.in								1782762		BFSOE	10.1007/s00374-012-0664-7		English	Biol. Fertil. Soils	Article	Scopus	nitrogen
Sritharan N., Vijayalakshmi C.	Crop performance, nitrogen and water use in aerobic rice cultivation	2012	Plant Archives	12	1		79	83			http://www.scopus.com/inward/record.url?eid=2-s2.0-84862541448&partnerID=40&md5=33e163d4787480647b510fb2856875da	Department of Crop Physiology, Tamil Nadu Agricultural University, Coimbatore - 3 (Tamil Nadu), India	Sritharan, N., Department of Crop Physiology, Tamil Nadu Agricultural University, Coimbatore - 3 (Tamil Nadu), India; Vijayalakshmi, C., Department of Crop Physiology, Tamil Nadu Agricultural University, Coimbatore - 3 (Tamil Nadu), India	One of the approaches that can be lead to a considerable amount of savings in water use by rice is aerobic cultivation, which combines the characteristics of both upland varieties with less water requirement and irrigated rice varieties with high response	Aerobic rice; Physiological and biochemical processes; Yield and water productivity							Agarwal, G.C., Sidhu, A.S., Singh, N.T., Effect of the interaction of transplanting date irrigation schedule and N on rice yield (1995) IRRN, 14, pp. 22-24; Babiychuk, E., Kushnir, S.V., Bellis-Boix, E., Van Montagu, M., Inze, D., Arabidopis thaliana NADD	Sritharan, N.; Department of Crop Physiology, Tamil Nadu Agricultural University, Coimbatore - 3 (Tamil Nadu), India; email: sritnau@yahoo.co.in								9725210					English	Plant Arch.	Article	Scopus	nitrogen
Usman K., Khan S.M., Awan I., Ghulam S., Khan M.U., Khan M.A., Rehman A.U.	Tillage and seed rate impact on wheat yield, soil organic matter and total soil nitrogen under rice-wheat cropping system in northwestern Pakistan	2012	Philippine Agricultural Scientist	95	2		160	168			http://www.scopus.com/inward/record.url?eid=2-s2.0-84864887057&partnerID=40&md5=666f3cc32000bc49e6f8d0bcd7cae1aa	Department of Agronomy, Faculty of Agriculture, Gomal University, D. I. Khan, 29050, Pakistan; Department of Entomology, Faculty of Agriculture, Gomal University, D. I. Khan, 29050, Pakistan; Department of Soil and Environmental Sciences, Faculty of Agric	Usman, K., Department of Agronomy, Faculty of Agriculture, Gomal University, D. I. Khan, 29050, Pakistan; Khan, S.M., Department of Entomology, Faculty of Agriculture, Gomal University, D. I. Khan, 29050, Pakistan; Awan, I., Department of Agronomy, Facult	Conservation tillage practices with an appropriate seed rate recover the declining wheat (Triticum aestivum L.) yield and soil quality using conventional tillage in poorly drained silty clay soil (calcareous, hyperthermic and Typic Torrifluvents) in rice-	Seed rate; Soil N; Soil organic matter; Tillage; Wheat yield							Ahmad, N., Hassan, F.U., Belford, R.K., Effect of soil compaction in the sub-humid cropping environment in Pakistan on uptake of NPK and grain yield in wheat (Triticum aestivum) (2009) Field Crop Res, 110, pp. 54-60; Arduini, I., Masoni, A., Ercoli, L., M	Usman, K.; Department of Agronomy, Faculty of Agriculture, Gomal University, D. I. Khan, 29050, Pakistan; email: marwat7862003@yahoo.com								317454					English	Philipp. Agric. Sci.	Article	Scopus	nitrogen
Lata K., Singh K.P., Nandal D.P., Hari O., Thakral S.K.	Effect-of organic and inorganic sources of fertilizer on growth parameters and productivity of wheat in rice-wheat system	2012	Annals of Biology	28	1		36	40			http://www.scopus.com/inward/record.url?eid=2-s2.0-84866596492&partnerID=40&md5=78739e6b614b7481e182dbced0356e32	Department of Agronomy, CCS Haryana Agricultural University, Hisar-125 004 (Haryana), India	Lata, K., Department of Agronomy, CCS Haryana Agricultural University, Hisar-125 004 (Haryana), India; Singh, K.P., Department of Agronomy, CCS Haryana Agricultural University, Hisar-125 004 (Haryana), India; Nandal, D.P., Department of Agronomy, CCS Hary	A field experiment was conducted during winter session of 2004-05 and 2006-06 at CCSHAU Rice Research Station, Kaul, Kaithal district of Haryana state to study the effect of organic manures and fertilizers on wheat and to work out their optimum combinatio	Growth parameters; Rice-wheat system; Vermicompost, nitrogen; Wheat productivity	compost; crop production; crop yield; dry matter; fertilizer application; growth rate; intercropping; manure; rice; soil nitrogen; spatiotemporal analysis; vermiculture; wheat; Haryana; India; Kaithal; Triticum aestivum						Azad, B.S., Gupta, S.C., Peer, A.C., Influence of organic and inorganic fertilizers in maximizing wheat yield at irrigated conditions (1998) Environ. Ecol., 16, pp. 71-73; Bhringuvanshi, S.R., Long-term effect of high doses of farm yard manure on soil pro	Lata, K.; Department of Agronomy, CCS Haryana Agricultural University, Hisar-125 004 (Haryana), India								9700153		ANBIE			English	Ann. Biol.	Article	Scopus	nitrogen
Singh S., Malik R., Garg R., Devraj R., Sheoran P.	On-farm nitrogen use pattern in wheat in rice-wheat cropping system of the trans-gangetic plains of India	2012	Cereal Research Communications	40	1		122	134			http://www.scopus.com/inward/record.url?eid=2-s2.0-84863240190&partnerID=40&md5=fc5c3704cb5fdd721295ef2a369144ee	Chaudhary Charan Singh Haryana Agricultural University, Hisar 125 004 Haryana, India; PAU Regional Research Station for Kandi Area Ballowal Saunkhri, P.O. Takarla, District S.B.S. Nagar, Punjab 144 521, India	Singh, S., Chaudhary Charan Singh Haryana Agricultural University, Hisar 125 004 Haryana, India, PAU Regional Research Station for Kandi Area Ballowal Saunkhri, P.O. Takarla, District S.B.S. Nagar, Punjab 144 521, India; Malik, R., Chaudhary Charan Singh	Apart from the issue of sustainability and resource drain, the yield plateau in the rice-wheat cropping system of south-east Asia is the major area of concern. Realizing that genetic gain is a remote possibility, efforts are directed to management options	grain yield; N-use efficiency; nitrogen; splits; topdressing; wheat	Hexapoda; Triticum aestivum						Abrol, Y.P., Chatterjee, S.R., Kumar, P.A., Jain, V., Improvement in nitrogen use efficiency: Physiological and molecular approaches (1999) Current Science, 76 (10), pp. 1357-1364; Adhikari, C., Bronson, K.F., Panaullah, G.M., Regmi, A.P., Saha, P.K., Dob	Singh, S.; Chaudhary Charan Singh Haryana Agricultural University, Hisar 125 004 Haryana, India								1333720		CRCMC	10.1556/CRC.40.2012.1.14		English	Cereal Res. Commun.	Article	Scopus	nitrogen
Gaur V.S., Singh U.S., Gupta A.K., Kumar A.	Understanding the differential nitrogen sensing mechanism in rice genotypes through expression analysis of high and low affinity ammonium transporter genes	2012	Molecular Biology Reports	39	3		2233	2241		1	http://www.scopus.com/inward/record.url?eid=2-s2.0-84863851640&partnerID=40&md5=0142adf47409b0108eb90b6e98c444f8	Department of Molecular Biology and Genetic Engineering, College of Basic Sciences and Humanities, G. B. Pant University of Agriculture and Technology, Pantnagar, Uttarakhand, India; Department of Plant Pathology, College of Agriculture, G. B. Pant Univer	Gaur, V.S., Department of Molecular Biology and Genetic Engineering, College of Basic Sciences and Humanities, G. B. Pant University of Agriculture and Technology, Pantnagar, Uttarakhand, India; Singh, U.S., Department of Plant Pathology, College of Agric	Two rice genotypes, Kalanamak 3119 (KN3119) and Pusa Basmati 1(PB1) differing in their optimum nitrogen requirements (30 and 120 kg/ha, respectively) were undertaken to study the expression of both high and low affinity ammonium transporter genes responsi	Ammonium transporter; Gene expression; Kalanamak; Nitrogen responsiveness; Pusa basmati; Real time PCR	ammonium sulfate; nitrogen; ammonium transporter gene; ammonium uptake; AMT1 gene; AMT2 gene; article; binding affinity; concentration response; controlled study; differential nitrogen sensing mechanism; gene activity; gene expression; gene function; gene	GENBANK: AAL05612, AAL05613, AAL05614, AAL58960, AAO41130, AK108711, BAB87832, BAC65232, NM_190445, NM_190448	ammonium sulfate, 7783-20-2; nitrogen, 7727-37-9; Cation Transport Proteins; DNA Primers; Nitrogen, 7727-37-9; Plant Proteins; ammonium transporters, plant				Bloom, A.J., Sukrapanna, S.S., Warner, R.L., Root respiration associated with ammonium and nitrate absorption by barley (1992) Plant Physiol, 99, pp. 1294-1301; Gazzarrini, S., Lejay, L., Gojon, A., Ninnemann, O., Frommer, W.B., Von Wireân, N., Three func	Kumar, A.; Department of Molecular Biology and Genetic Engineering, College of Basic Sciences and Humanities, G. B. Pant University of Agriculture and Technology, Pantnagar, Uttarakhand, India; email: anilkumar.mbge@gmail.com								3014851		MLBRB	10.1007/s11033-011-0972-2	21678052	English	Mol. Biol. Rep.	Article	Scopus	nitrogen
Kumari, Nidhi, Narayan O.P., Rai L.C.	Cyanobacterial diversity shifts induced by butachlor in selected Indian rice fields in Eastern Uttar Pradesh and Western Bihar analyzed with PCR and DGGE	2012	Journal of Microbiology and Biotechnology	22	1		1	12			http://www.scopus.com/inward/record.url?eid=2-s2.0-84856574331&partnerID=40&md5=233524ed9d6ab729e451769ca2ab699d	Molecular Biology Section, Centre of Advanced Study in Botany, Banaras Hindu University, Varanasi-221005, India	Kumari, Molecular Biology Section, Centre of Advanced Study in Botany, Banaras Hindu University, Varanasi-221005, India; Nidhi, Molecular Biology Section, Centre of Advanced Study in Botany, Banaras Hindu University, Varanasi-221005, India; Narayan, O.P.,	The present study examines the effects of 30 mg/kg butachlor on the cyanobacterial diversity of rice fields in Eastern Uttar Pradesh and Western Bihar in India. A total of 40 samples were grouped into three classes [(i) acidic, (ii) neutral, and (iii) alk	Cyanobacteria; Denaturing gradient gel electrophoresis; India; N-butoxymethyl-2-chloro-2',6'-diethylacetanilide; Paddy fields	butoclor; herbicide; RNA 16S; unclassified drug; Anabaena; Anabaenopsis; article; Aulosira; Calothrix; cyanobacterium; Cylindrospermum; denaturing gradient gel electrophoresis; fischerella; Gloeotrichia; India; Leptolyngbya; microbial diversity; nitrogen	GENBANK: AB093486, AB325535, AB325906, AF247593, AJ630428, AJ630456, AM709634, AM711532, AM711538, AM711547, AM773307, BA000019, DQ786168, DQ897365, EF160010, EU057151, EU599117, FJ661002, FJ919602, FJ919603, FJ919604, FJ919605, FJ919606, FJ919607, FJ9196	Acetanilides; DNA, Bacterial; DNA, Ribosomal; Herbicides; RNA, Ribosomal, 16S; butachlor, 23184-66-9				Ateeq, B., Farah, M.A., Ali, M.N., Ahmad, W., Clastogenicity of pentachlorophenol, 2,4-D and butachlor evaluated by Allium root tip test (2002) Mutat. Res., 514, pp. 105-113; Berrendero, E., Perona, E., Mateo, P., Genetic and morphological characterizatio	Rai, L. C.; Molecular Biology Section, Centre of Advanced Study in Botany, Banaras Hindu University, Varanasi-221005, India; email: lcrbhu15@gmail.com								10177825		JOMBE	http://dx.doi.org/10.4014/jmb.1106.06016	22297214	English	J. Microbiol. Biotechnol.	Article	Scopus	nitrogen
Shibu M.E., Van Keulen H., Leffelaar P.A.	Long-term dynamics of soil C and N in intensive rice-based cropping systems of the Indo-Gangetic Plains (IGP): A modelling approach	2012	Ecological Modelling	232			40	63			http://www.scopus.com/inward/record.url?eid=2-s2.0-84858738867&partnerID=40&md5=7be8b107d3bf82c99d1e67f21830a4ca	Plant Production Systems Group, Wageningen University, P.O. Box 430, 6700 AK Wageningen, Netherlands; Plant Research International, Wageningen University and Research Centre, P.O. Box 16, 6700 AA Wageningen, Netherlands; The James Hutton Institute, Craigi	Shibu, M.E., Plant Production Systems Group, Wageningen University, P.O. Box 430, 6700 AK Wageningen, Netherlands, The James Hutton Institute, Craigiebuckler, Aberdeen, Scotland AB15 8QH, United Kingdom; Van Keulen, H., Plant Production Systems Group, Wag	We describe a summary model for the dynamics of carbon and nitrogen under varying weather, crop and soil conditions to investigate the role of soil organic carbon and nitrogen in yield formation in rice-based cropping systems of the Indo-Gangetic Plains (	Crop yield; Long-term experiment; Nitrogen dynamics; Soil organic carbon; Wheat	Crop yield; Long-term experiments; Nitrogen dynamics; Soil organic carbon; Wheat; Agronomy; Biomass; Calibration; Carbon; Crops; Dynamics; Ecology; Experiments; Lakes; Manganese; Nitrogen; Soils; Water supply; Geologic models; agricultural soil; calibrati						Adams, T.M., Adams, S.N., The effects of liming and soil pH on carbon and nitrogen contained in the soil biomass (1983) J. Agric. Sci., 101, pp. 553-558; Adam, M., Van Bussel, L.G.J., Leffelaar, P.A., Van Keulen, H., Ewert, F., Effects of modelling detail	Shibu, M.E.; The James Hutton Institute, Craigiebuckler, Aberdeen, Scotland AB15 8QH, United Kingdom; email: shibu.muhammed@hutton.ac.uk								3043800		ECMOD	10.1016/j.ecolmodel.2012.02.020		English	Ecol. Model.	Article	Scopus	Nitrogen supply, fertilizer, water, water management, nitrogen
Sandhu S.S., Mahal S.S., Vashist K.K., Buttar G.S., rar A.S., Singh M.	Crop and water productivity of bed transplanted rice as influenced by various levels of nitrogen and irrigation in northwest India	2012	Agricultural Water Management	104			32	39		2	http://www.scopus.com/inward/record.url?eid=2-s2.0-84855822135&partnerID=40&md5=3e1fc28070e5ac7c1d4be47e7df2bdcb	Department of Agricultural Meteorology, Punjab Agricultural University, Ludhiana, Punjab, India; Department of Agronomy, Punjab Agricultural University, Ludhiana, Punjab, India	Sandhu, S.S., Department of Agricultural Meteorology, Punjab Agricultural University, Ludhiana, Punjab, India; Mahal, S.S., Department of Agronomy, Punjab Agricultural University, Ludhiana, Punjab, India; Vashist, K.K., Department of Agronomy, Punjab Agri	Food security and water resources in Indian Punjab are under threat and there is a need to produce more rice with less water. Therefore, an experiment was conducted at Ludhiana, during summers of 2009 and 2010 to evaluate water saving techniques in rice c	Disappearance and soil suction; Fresh bed; Puddle; Tensiometer	Food security; Fresh bed; Grain yield; Irrigation schedule; Irrigation waters; Loamy sand; Nitrogen levels; Puddle; Rice cultivation; Rice seedlings; Soil suction; Split-plot; Tensiometer; Water productivity; Water saving; Crops; Experiments; Food supply;						Aggarwal, G.C., Sidhu, A.S., Sekhon, N.K., Sandhu, K.S., Sur, H.S., Puddling and N management effects on crop response in a rice-wheat cropping system (1995) Soil Tillage Res., 36, pp. 129-139; (2011), http://beta.irri.org/solutions/index.php%3Foption=com	Sandhu, S.S.; Department of Agricultural Meteorology, Punjab Agricultural University, Ludhiana, Punjab, India; email: ssandhu@pau.edu								3783774		AWMAD	10.1016/j.agwat.2011.11.012		English	Agric. Water Manage.	Article	Scopus	Nitrogen supply, food security, nitrogen
Bhatia A., Aggarwal P.K., Jain N., Pathak H.	Greenhouse gas emission from rice- and wheat-growing areas in India: Spatial analysis and upscaling	2012	Greenhouse Gases: Science and Technology	2	2		115	125		2	http://www.scopus.com/inward/record.url?eid=2-s2.0-84859878142&partnerID=40&md5=4da88574d5efc6e9a0b77cf8df3635a7	Division of Environmental Sciences, Indian Agricultural Research Institute, New Delhi 110012, India; International Water Management Institute, NASC Complex, New Delhi, India	Bhatia, A., Division of Environmental Sciences, Indian Agricultural Research Institute, New Delhi 110012, India; Aggarwal, P.K., International Water Management Institute, NASC Complex, New Delhi, India; Jain, N., Division of Environmental Sciences, Indian	The intensified rice and wheat cropping systems consume most of the fertilizer and irrigation water in India and are major sources of greenhouse gas (GHG) emissions. The InfoCrop simulation model was evaluated to calculate methane (CH 4), nitrous oxide (N	carbon dioxide; global warming potential; InfoCrop model; methane; nitrous oxide	Agricultural areas; Climatic parameters; Crop managements; Farmyard manure; GHG emission; Global warming potential; Irrigation waters; Methane emissions; Nitrous oxide; Rice fields; Simulation model; Spatial analysis; Upscaling; Wheat cropping; Anesthetic						(2009) MOA, Agricultural Statistics at A Glance 2009 [Online], , http://dacnet.nic.in, Directorate of Economics and Statistics, Department of Agriculture and Cooperation (DAC), Ministry of Agriculture, Government of India; Bhatia, A., Pathak, H., Aggarwal	Bhatia, A.; Division of Environmental Sciences, Indian Agricultural Research Institute, New Delhi 110012, India; email: abensc@gmail.com								21523878			10.1002/ghg.1272		English	Greenh. Gases Sci. Technol.	Article	Scopus	Nitrogen supply, nitrogen
Ghimire R., Adhikari K.R., Chen Z.-S., Shah S.C., Dahal K.R.	Soil organic carbon sequestration as affected by tillage, crop residue, and nitrogen application in rice-wheat rotation system	2012	Paddy and Water Environment	10	2		95	102		2	http://www.scopus.com/inward/record.url?eid=2-s2.0-84862137491&partnerID=40&md5=6bdf39f585ea3b92d9a1402afa2257e7	Institute of Agriculture and Animal Sciences (IAAS), Tribhuvan University, Rampur Campus, Chitwan, Nepal; Department of Agricultural Chemistry, National Taiwan University, 1, Section 4th, Roosevelt Rd., Taipei 10617, Taiwan	Ghimire, R., Institute of Agriculture and Animal Sciences (IAAS), Tribhuvan University, Rampur Campus, Chitwan, Nepal; Adhikari, K.R., Department of Agricultural Chemistry, National Taiwan University, 1, Section 4th, Roosevelt Rd., Taipei 10617, Taiwan; C	Despite being a major domain of global food supply, rice-wheat cropping system is questioned for its contribution to carbon flux. Enhancing the organic carbon pool in this system is therefore necessary to reduce environmental degradation and maintain agri	Conventional tillage; Crop residue; No-tillage; Organic carbon; Rice-wheat crop rotation; Soil depth	Conventional tillage; Crop residue; Crop rotation; No tillage; Soil depth; Agricultural machinery; Agricultural wastes; Agronomy; Degradation; Food supply; Forestry; Organic carbon; Soils; Oryza sativa; Triticum aestivum; Vigna radiata; Vigna radiata var.						Aulakh, M.S., Khera, T.S., Doran, J.W., Bronson, K.F., Managing crop residue with green manure, urea, and tillage in rice-wheat rotation (2001) Soil Sci Soc Am J, 65, pp. 820-827; Aulakh, M.S., Khera, T.S., Doran, J.W., Bronson, K.F., Denitrification, N 2	Adhikari, K. R.; Department of Agricultural Chemistry, National Taiwan University, 1, Section 4th, Roosevelt Rd., Taipei 10617, Taiwan; email: keshav.adhikari2008@gmail.com								16112490			10.1007/s10333-011-0268-0		English	Paddy Water Environ.	Article	Scopus	nitrogen, crop rotation
Iqbal A.M., Sameer Samad S., Nehvi F.A., John A.A., Arshid A., Lone A.A., Ali G., Yasmeen S., Sethi J., Dar N.A.	Demography of saffron growing villages of Kashmir	2012	Medicinal Plants	4	4		183	188			http://www.scopus.com/inward/record.url?eid=2-s2.0-84880066726&partnerID=40&md5=6364a85296916d4e14f49bdab035009c	Saffron Research Station, Pampore, Sher-e-Kashmir University of Agricultural Sciences and Technology, Jammu and Kashmir, India	Iqbal, A.M., Saffron Research Station, Pampore, Sher-e-Kashmir University of Agricultural Sciences and Technology, Jammu and Kashmir, India; Sameer Samad, S., Saffron Research Station, Pampore, Sher-e-Kashmir University of Agricultural Sciences and Techno	Saffron is a legendry crop of Jammu & Kashmir state. A survey was conducted in 2009 to study the status of agriculture with particular reference to saffron in predominant saffron belts of District Pulwama and Budgam of Kashmir valley. Highest number of sa	Demography; India; Kashmir; Saffron	fertilizer; pesticide; almond; article; Crocus sativus; crop rotation; cultivated land; demography; geographic distribution; India; irrigation (agriculture); lentil; linseed; manure; nonhuman; oat; plant growth; plant seed; planting time; pollution; prior						(2010) Digest of Statistics Directorate of Economics and Evaluation, , Annonymous, Government of Jammu & Kashmir; (2001) Primary Census Abstract, , Annonymous, Census Department, Government of Jammu & Kashmir; Mir, M.A., Post harvest handling and processi	Iqbal, A. M.; Saffron Research Station, Pampore, Sher-e-Kashmir University of Agricultural Sciences and Technology, Jammu and Kashmir, India; email: asifquresh@gmail.com								9754261			10.5958/j.0975-4261.4.4.032		English	Med. Plants	Article	Scopus	Planting
Ahmad S., Hasanuzzaman M.	Integrated effect of plant density, N rates and irrigation regimes on the biomass production, N content, PAR use efficiencies and water productivity of rice under irrigated semiarid environment	2012	Notulae Botanicae Horti Agrobotanici Cluj-Napoca	40	1		201	211		3	http://www.scopus.com/inward/record.url?eid=2-s2.0-84861371598&partnerID=40&md5=6601915d02f50dc06559120ce717205d	Bahauddin Zakariya University, Department of Agronomy, Multan-60800, Pakistan; Sher-e-Bangla Agricultural University, Department of Agronomy, Faculty of Agriculture, Dhaka-1207, Bangladesh	Ahmad, S., Bahauddin Zakariya University, Department of Agronomy, Multan-60800, Pakistan; Hasanuzzaman, M., Sher-e-Bangla Agricultural University, Department of Agronomy, Faculty of Agriculture, Dhaka-1207, Bangladesh	Two field experiments were conducted for two years (2000 and 2001) at Agronomic Research Area, University of Agriculture Faisalabad (UAF), Pakistan. There were 15 treatment combinations for experiment-I having three plant densities, viz., one seedling hil	Irrigated rice; Nutrient management; Photosynthesis; Planting density; Yield potential							Ahmad, S., Ahmad, A., Ali, H., Hussain, H., Garcia y Garcia, A., Khan, M.A., Zia-ul-Haq, M., Hoogenboom, G., Application of the CSM-CERES-Rice model for evaluation of plant density and irrigation management of transplanted rice for an irrigated semiarid e	Hasanuzzaman, M.; Sher-e-Bangla Agricultural University, Department of Agronomy, Faculty of Agriculture, Dhaka-1207, Bangladesh; email: mhzsauag@yahoo.com								0255965X					English	Not. Bot. Horti Agrobot. Cluj-Napoca	Article	Scopus	Planting
Singla N., Babbar B.K., Kaur J.	Farmers' participatory research on rodent control in Punjab state: Survey, education, impact assessment and sustainability	2012	Crop Protection	34			25	31			http://www.scopus.com/inward/record.url?eid=2-s2.0-84855433176&partnerID=40&md5=a0f84798d0f178dab011e5198f982ae7	Department of Zoology, Punjab Agricultural University, Ludhiana-141004, Punjab, India	Singla, N., Department of Zoology, Punjab Agricultural University, Ludhiana-141004, Punjab, India; Babbar, B.K., Department of Zoology, Punjab Agricultural University, Ludhiana-141004, Punjab, India; Kaur, J., Department of Zoology, Punjab Agricultural Un	Survey of farmers from ten villages of districts Ludhiana, Jalandhar and Sangrur in Punjab (India) from 2000-01 to 2008-09 revealed that farmers' knowledge, general attitude and rodent control practices were similar across villages. Overall, 60.0-100.0% f	Farmers' education; Impact assessment; Rodent control; Rodenticide; Survey; Sustainability	bait; census; education; environmental impact; farmers attitude; farmers knowledge; field survey; integrated pest management; pest control; pest damage; pesticide; rice; rodent; sustainability; village; wheat; India; Ludhiana; Punjab [India]; Oryza sativa						Advani, R., Mathur, R.P., Experimental reduction of rodent damage to vegetable crops in Indian villages (1982) Agroecosystems, 8, pp. 39-45; Advani, R., Prakash, I., Variation in rodent population in response to four anticoagulant rodenticides in the resi	Singla, N.; Department of Zoology, Punjab Agricultural University, Ludhiana-141004, Punjab, India; email: neenasingla1@gmail.com								2612194		CRPTD	10.1016/j.cropro.2011.11.022		English	Crop Prot.	Article	Scopus	rodent, knowledge
Norton G.J., Pinson S.R.M., Alexander J., McKay S., Hansen H., Duan G.-L., Rafiqul Islam M., Islam S., Stroud J.L., Zhao F.-J., McGrath S.P., Zhu Y.-G., Lahner B., Yakubova E., Guerinot M.L., Tarpley L., Eizenga G.C., Salt D.E., Meharg A.A., Price A.H.	Variation in grain arsenic assessed in a diverse panel of rice (Oryza sativa) grown in multiple sites	2012	New Phytologist	193	3		650	664		9	http://www.scopus.com/inward/record.url?eid=2-s2.0-84855780581&partnerID=40&md5=2a82947b58f27c2aa01de7d9e8ce4429	Institute of Biological and Environmental Sciences, University of Aberdeen, Cruickshank Building, St Machar Drive, Aberdeen AB24 3UU, United Kingdom; USDA ARS, Rice Research Unit, Beaumont, TX 77713, United States; Research Center for Eco-environmental Sc	Norton, G.J., Institute of Biological and Environmental Sciences, University of Aberdeen, Cruickshank Building, St Machar Drive, Aberdeen AB24 3UU, United Kingdom; Pinson, S.R.M., USDA ARS, Rice Research Unit, Beaumont, TX 77713, United States; Alexander,	• Inorganic arsenic (As i) in rice (Oryza sativa) grains is a possible threat to human health, with risk being strongly linked to total dietary rice consumption and consumed rice As i content. This study aimed to identify the range and stability of geneti	Arsenic; Breeding; Cultivar variation; Inorganic arsenic; Rice	arsenic; arsenic; bioaccumulation; cultivar; environmental factor; flooding; food consumption; food quality; genetic variation; health risk; plant breeding; public health; rice; subpopulation; article; Bangladesh; China; flower; genetic variability; genet		arsenic, 7440-38-2; Arsenic, 7440-38-2				Abbas, M.H.H., Meharg, A.A., Arsenate, arsenite and dimethyl arsinic acid (DMA) uptake and tolerance in maize (Zea mays L.) (2008) Plant and Soil, 304, pp. 277-289; Adomako, E.E., Solaiman, A.R.M., Williams, P.N., Deacon, C., Rahman, G.K.M.M., Meharg, A.A	Norton, G.J.; Institute of Biological and Environmental Sciences, University of Aberdeen, Cruickshank Building, St Machar Drive, Aberdeen AB24 3UU, United Kingdom; email: g.norton@abdn.ac.uk								0028646X		NEPHA	10.1111/j.1469-8137.2011.03983.x	22142234	English	New Phytol.	Article	Scopus	Seed quality, flooding
Waheed A., Ahmad H., Abbasi F.M.	Different treatment of rice seed dormancy breaking, germination of both wild species and cultivated varieties (oryza sativa l.)	2012	Journal of Materials and Environmental Science	3	3		551	560		3	http://www.scopus.com/inward/record.url?eid=2-s2.0-84874970892&partnerID=40&md5=b26fec162fe29e8777dd620decc019fc	Genetics Department, Hazara University, Mansehra (KPK), Pakistan	Waheed, A., Genetics Department, Hazara University, Mansehra (KPK), Pakistan; Ahmad, H., Genetics Department, Hazara University, Mansehra (KPK), Pakistan; Abbasi, F.M., Genetics Department, Hazara University, Mansehra (KPK), Pakistan	The present study was conducted at Genetics Department, Hazara University Garden Campus and during 2008-09 as a part of PhD study. Seed dormancy breaking, germination tests of 2 wild speciesi.e., O. longistaminata and O. rufipogon and 3 local cultivated r	KPK; Pakistan; Rice; Seed dormancy; Treatments							Agrawal, P.K., (1981) Seed Research, 9, pp. 20-27; Agrawal, P.K., Nanda, R., (1969) Mol. Gen. Genet., 18, p. 325; (2009) Econ & Business Res. Wing Karachi, pp. 25-27. , Anonymous NBP; Chalam, O.V., Singh, A., Douglas, E., (1967) Seed Testing Manual, 3, p.	Waheed, A.; Genetics Department, Hazara University, Mansehra (KPK), Pakistan; email: abdulw900@gmail.com								20282508					English	J. Mater. Environ. Sci.	Article	Scopus	Seed variety
Ghosh S., Wilson B., Ghoshal S., Senapati N., Mandal B.	Organic amendments influence soil quality and carbon sequestration in the Indo-Gangetic plains of India	2012	Agriculture, Ecosystems and Environment	156			134	141		5	http://www.scopus.com/inward/record.url?eid=2-s2.0-84861950800&partnerID=40&md5=6cf0c5201d101c9de10fed02953df917	Centre for Urban Greenery and Ecology, National Parks Board, Singapore 259569, Singapore; School of Environmental and Rural Science, University of New England, Armidale, NSW 2351, Australia; Office of Environment and Heritage, University of New England, A	Ghosh, S., Centre for Urban Greenery and Ecology, National Parks Board, Singapore 259569, Singapore, School of Environmental and Rural Science, University of New England, Armidale, NSW 2351, Australia; Wilson, B., School of Environmental and Rural Science	Soil organic carbon is considered to be of central importance in maintaining soil quality. We assessed the effects of a range of commonly applied organic and inorganic amendments on soil quality in a rice-wheat cropping system in the Indo-Gangetic plains	Carbon pool; Farmyard manure; Green manure; Paddy straw; Soil organic carbon; Soil quality	biomass; carbon sequestration; crop yield; cropping practice; cultivation; fertilizer application; manure; microbial community; nutrient availability; organic soil; rice; soil carbon; soil fertility; soil nutrient; soil quality; wheat; Gangetic Plain; Ind						Amlinger, F., Peyr, S., Geszit, J., Dreher, P., Weinfurtner, K., Nortcliff, S., (2007) Beneficial Effects of Compost Application on Fertility and Productivity of Soils: A Literature Study, p. 235. , Federal Ministry for Agriculture and Forestry, Environme	Ghosh, S.; Centre for Urban Greenery and Ecology, National Parks Board, Singapore 259569, Singapore; email: subhadip00@rediffmail.com								1678809		AEEND	10.1016/j.agee.2012.05.009		English	Agric. Ecosyst. Environ.	Article	Scopus	soil fertility
Patra K.C., Rautray T.R., Nayak P.	Analysis of grains grown on fly ash treated soils	2012	Applied Radiation and Isotopes	70	8		1797	1802		2	http://www.scopus.com/inward/record.url?eid=2-s2.0-84863778919&partnerID=40&md5=cf92b70c5c16bc0254430fc2fa57c8e2	Department of Physics, Sambalpur University, Jyoti Vihar, Burla 768019, India; Institute of Physics, Sachivalaya Marg, Bhubaneswar 751005, India; Centre of Excellence in Theoretical and Math Sciences, SOA University, Bhubaneswar 751030, Odisha, India; Cen	Patra, K.C., Department of Physics, Sambalpur University, Jyoti Vihar, Burla 768019, India, Institute of Physics, Sachivalaya Marg, Bhubaneswar 751005, India; Rautray, T.R., Centre of Excellence in Theoretical and Math Sciences, SOA University, Bhubaneswa	One time application of fly ash was done at the rate of 200. t/hectare in the crop lands in Odisha, India. The increase in yield of maize grains was 28% and 34% over the control values whereas the increase in yield of rice grains was 40% and 13% at Malud	Elemental analysis; Fly ash; Grains; Soil; Yield	Control values; Crop yield; Physical and chemical properties; Rice grains; Soil fertility; Treated soils; Yield; Agriculture; Chemical analysis; Chemical properties; Fly ash; Soils; Grain (agricultural product); coal; article; bulk density; chemical analy						Adriano, D.C., Page, A.L., Elseewi, A.A., Chang, A., Straughan, I.A., Utilization and disposal of fly ash and other coal residues in terrestrial ecosystem: a review (1980) J. Environ. Quality, 9, pp. 333-344; Alkorta, I., Hernandez-Allica, J., Becerril, J	Rautray, T.R.; Centre of Excellence in Theoretical and Math Sciences, SOA University, Bhubaneswar 751030, Odisha, India; email: tapash.rautray@gmail.com								9698043		ARISE	10.1016/j.apradiso.2012.03.037		English	Appl. Radiat. Isot.	Article	Scopus	soil fertility
Pooniya V., Shivay Y.S., Rana A., Nain L., Prasanna R.	Enhancing soil nutrient dynamics and productivity of Basmati rice through residue incorporation and zinc fertilization	2012	European Journal of Agronomy	41			28	37		1	http://www.scopus.com/inward/record.url?eid=2-s2.0-84860640070&partnerID=40&md5=3ca3008cb04202e60d105e4b22e3d300	Division of Agronomy, Indian Agricultural Research Institute (IARI), New Delhi 110 012, India; Division of Microbiology, Indian Agricultural Research Institute (IARI), New Delhi 110 012, India	Pooniya, V., Division of Agronomy, Indian Agricultural Research Institute (IARI), New Delhi 110 012, India; Shivay, Y.S., Division of Agronomy, Indian Agricultural Research Institute (IARI), New Delhi 110 012, India; Rana, A., Division of Microbiology, In	Field experiments were conducted to evaluate the effects of summer green manuring crops (SGMCs) and zinc (Zn) fertilization on soil biological properties, nutrient dynamics and productivity of Basmati rice, during summer-rainy (kharif, April-November) sea	Basmati rice; N balance; Productivity; Soil microbial properties; Summer green manuring crops (SGMCs); Zn fertilization	agricultural soil; crop residue; crop yield; enrichment; enzyme activity; experimental study; fertilizer application; legume; manure; microbial activity; nutrient budget; nutrient dynamics; rice; soil fertility; soil microorganism; soil nutrient; soil pro						Agarwal, H.P., Gupta, M.L., Effect of copper and zinc on copper nutrition to rice (1994) Ann. Agric. Res., 15, pp. 162-166; Alloway, B.J., Soil factors associated with zinc deficiency in crops and humans (2008) Environ. Geochem. Health, 31, pp. 537-538; A	Prasanna, R.; Division of Microbiology, Indian Agricultural Research Institute (IARI), New Delhi 110 012, India; email: radhapr@gmail.com								11610301		EJAGE	10.1016/j.eja.2012.03.004		English	Eur. J. Agron.	Article	Scopus	soil fertility
Mitra B., Mandal B.	Effect of nutrient management and straw mulching on crop yield, uptake and soil fertility in rapeseed (Brassica campestris)-greengram (Vigna radiata)-rice (Oryza sativa) cropping system under Gangetic plains of India	2012	Archives of Agronomy and Soil Science	58	2		213	222			http://www.scopus.com/inward/record.url?eid=2-s2.0-84856944248&partnerID=40&md5=a01f2d278dd4f4975acb4e086175ff64	Uttar Banga Krishi Viswavidyalaya, Krishi vigyan Kendra, Pundibari, Coochbehar, India; Department of Agronomy, Bidhan Chandra Krishi Viswavidyalaya, Kolkata, India	Mitra, B., Uttar Banga Krishi Viswavidyalaya, Krishi vigyan Kendra, Pundibari, Coochbehar, India; Mandal, B., Department of Agronomy, Bidhan Chandra Krishi Viswavidyalaya, Kolkata, India	An experiment was conducted at Bidhan Chandra Krishi Viswavidyalaya, West Bengal, India during 2001-2003 to study the effect of levels of fertility and straw mulch on a rapeseed (Brassica campestris var yellow sarson)-greengram (Vigna radiata)-rice (Oryza	nutrient uptake; soil fertility; straw mulch; yield	Brassica napus; Brassica rapa; Brassica rapa trilocularis; Oryza sativa; Vigna radiata; Vigna radiata var. radiata						Chopra, S.L., Kanwar, T.S., (1978) Analytical agricultural chemistry, pp. 170-171. , New Delhi, (India): Kalyani Publishers; Gangwar, B., Katyal, V., Productivity, stability and profitability of rice based crop sequences in West Bengal and Orissa (2001) I	Mitra, B.; Uttar Banga Krishi Viswavidyalaya, Krishi vigyan Kendra, Pundibari, Coochbehar, India; email: bipmitra@yahoo.com								3650340			10.1080/03650340.2010.512611		English	Arch. Agron. Soil Sci.	Article	Scopus	soil fertility
Ali R.I., Awan T.H., Ahmad M., Saleem M.U., Akhtar M.	Diversification of rice-based cropping systems to improve soil fertility, sustainable productivity and economics	2012	Journal of Animal and Plant Sciences	22	1		108	112		3	http://www.scopus.com/inward/record.url?eid=2-s2.0-84861442664&partnerID=40&md5=923190d4dba7c5de68fcee4bdf1caf94	Rice Research Institute, Kala Shah Kaku, Pakistan	Ali, R.I., Rice Research Institute, Kala Shah Kaku, Pakistan; Awan, T.H., Rice Research Institute, Kala Shah Kaku, Pakistan; Ahmad, M., Rice Research Institute, Kala Shah Kaku, Pakistan; Saleem, M.U., Rice Research Institute, Kala Shah Kaku, Pakistan; Akh	Experiment on rice based cropping systems to improve soil fertility and sustainable crop productivity was conducted at Rice Research Institute, Kala Shah Kaku, Sheikhupura, Pakistan during 2007-08 in Randomized Complete Block Design with three replication	Cropping pattern; Economics; Green manuring; Leguminous crops; Rice; Soil fertility; Sustainable productivity	Brassica napus; Brassica napus var. napus; Helianthus; Lens culinaris; Naso hexacanthus; Rostrata; Sesbania; Triticum aestivum						Ahmad, N., Efficient use of plant nutrients (1992) Proc. 4th National Cong. Soil Soci, 2, p. 22; (2006) Economic Survey, Finance Division, , Anonymous, Govt. Pakistan., Islamabad; Bali, A.S., Siddique, M., Ganai, B.A., Khan, H.V., Singh, K.N., Bali, A.S.,	Ali, R. I.; Rice Research Institute, Kala Shah Kaku, Pakistan; email: ranainayatali@yahoo.com								10187081					English	J. Anim. Plant Sci.	Article	Scopus	soil fertility, diversification, sustainability
Behera B., Sankar G.R.M., Sharma K.L., Mishra A., Mohanty S.K., Mishra P.K., Rath B.S., Grace J.K.	Effects of Fertilizers on Yield, Sustainability, and Soil Fertility under Rainfed Pigeon pea + Rice System in Subhumid Oxisol Soils	2012	Communications in Soil Science and Plant Analysis	43	17		2228	2246			http://www.scopus.com/inward/record.url?eid=2-s2.0-84865179902&partnerID=40&md5=5505293ed1eacf1fa06dad9ec3970dea	All-India Coordinated Research Project for Dryland Agriculture, Orissa University of Agriculture and Technology, Phulbani, Orissa, India; All-India Coordinated Research Project for Dryland Agriculture, Central Research Institute for Dryland Agriculture, D	Behera, B., All-India Coordinated Research Project for Dryland Agriculture, Orissa University of Agriculture and Technology, Phulbani, Orissa, India; Sankar, G.R.M., All-India Coordinated Research Project for Dryland Agriculture, Central Research Institut	A long-term field experiment was conducted at the research farm of the All-India Coordinated Research Project for Dryland Agriculture, Phulbani, Orissa, India, from 2001 to 2006 to identify the best integrated nutrient-use treatments for ensuring greater	integrated nutrient management (INM); Productivity; profitability; relative soil quality index; sustainability	agricultural research; crop yield; dryland farming; fertilizer application; intercropping; land management; legume; manure; nutrient use; Oxisol; productivity; profitability; rainfed agriculture; rice; soil fertility; soil quality; stakeholder; sustainabi						Behera, B., Mohanty, S.K., Pal, A.K., Integrated nutrient supply system for pigeon pea + rice intercropping system (2005) Resource-conserving technologies for social upliftment, pp. 226-229. , In: Sharda V. N., editors Dehradun: Indian Association of Soil	Sharma, K. L.; All-India Coordinated Research Project for Dryland Agriculture, Central Research Institute for Dryland Agriculture, Division of Resource Management, Santhoshnagar, P. O. Saidabad, Hyderabad, Andhra Pradesh 500 059, India; email: klsharma@cr								103624		CSOSA	10.1080/00103624.2012.701685		English	Commun. Soil Sci. Plant Anal.	Article	Scopus	soil fertility, fertilizer
Srinivasarao Ch., Venkateswarlu B., Lal R., Singh A.K., Vittal K.P.R., Kundu S., Singh S.R., Singh S.P.	Long-term effects of soil fertility management on carbon sequestration in a rice-lentil cropping system of the indo-gangetic plains	2012	Soil Science Society of America Journal	76	1		167	178		9	http://www.scopus.com/inward/record.url?eid=2-s2.0-84855423914&partnerID=40&md5=afac2d31885da07fa67ec63c59dc5beb	Central Research Institute for Dryland Agriculture, Santoshnagar, Saidabad (P.O.), Hyderabad, 500 059 Andhra Pradesh, India; Carbon Management and Sequestration Center, Ohio State Univ., Columbus, OH 43210, United States; Indian Council of Agricultural Re	Srinivasarao, Ch., Central Research Institute for Dryland Agriculture, Santoshnagar, Saidabad (P.O.), Hyderabad, 500 059 Andhra Pradesh, India; Venkateswarlu, B., Central Research Institute for Dryland Agriculture, Santoshnagar, Saidabad (P.O.), Hyderabad	Enrichment of soil organic carbon (SOC) stocks through sequestration of atmospheric CO 2 in agricultural soils is important because of its impacts on soil quality, agronomic production, and adaptation to and mitigation of climate change. In a 21-yr field		Agricultural soils; Atmospheric CO; C sequestration; Carbon sequestration; Conjunctive use; Crop residue; Crop yield; Cropping sequences; Cropping systems; Farmyard manure; Field experiment; Grain yield; Indo-Gangetic Plains; Long-term effects; Mineral fe						Bhattacharyya, R., Prakash, V., Kundu, S., Srivastava, A.K., Gupta, H.S., Soil properties and their relationships with crop productivity after 30 years of different fertilization in the Indian Himalayas (2009) Arch. Agron. Soil Sci., 55, pp. 641-661. , do	Srinivasarao, Ch.; Central Research Institute for Dryland Agriculture, Santoshnagar, Saidabad (P.O.), Hyderabad, 500 059 Andhra Pradesh, India; email: cherukumalli2011@gmail.com								3615995		SSSJD	10.2136/sssaj2011.0184		English	Soil Sci. Soc. Am. J.	Article	Scopus	soil fertility, fertilizer, sustainability
Barua S., Tripathi S., Chakraborty A., Ghosh S., Chakrabarti K.	Characterization and crop production efficiency of diazotrophic bacterial isolates from coastal saline soils	2012	Microbiological Research	167	2		95	102		2	http://www.scopus.com/inward/record.url?eid=2-s2.0-84855519183&partnerID=40&md5=13ba831f6e7ebf9d8ef9301368875f6f	Department of Agricultural Chemistry and Soil Science, Institute of Agricultural Science, University of Calcutta, 35 Ballygunge Circular Road, Kolkata 700019, India; Department of Agronomy, Bidhan Chandra Krishi Viswavidyalaya, West Bengal 741252, India;	Barua, S., Department of Agricultural Chemistry and Soil Science, Institute of Agricultural Science, University of Calcutta, 35 Ballygunge Circular Road, Kolkata 700019, India; Tripathi, S., Department of Agricultural Chemistry and Soil Science, Institute	Use of eco-friendly area specific salt tolerant bioinoculants is better alternatives to chemical fertilizer for sustainable agriculture in coastal saline soils. We isolated diverse groups of diazotrophic bacteria from coastal saline soils of different for	Coastal soil; Diazotrophs; Lady's finger; Phylogenetic analysis; Rice	Coastal soils; Diazotrophs; Lady's finger; Phylogenetic analysis; Rice; Acetic acid; Bacteriology; Crops; Cultivation; Fertilizers; Genes; Productivity; Soils; bacterial DNA; nitrogenase reductase; oxidoreductase; ribosome DNA; RNA 16S; alternative agricu	GENBANK: EU732656, EU831294, EU831296, EU831304, GQ411207, GQ411215, GQ891110, GQ891112	oxidoreductase, 9035-73-8, 9035-82-9, 9037-80-3, 9055-15-6; DNA, Bacterial; DNA, Ribosomal; Oxidoreductases, 1.-; RNA, Ribosomal, 16S; nitrogenase reductase, 1.18.6.1				Alexander, M., (1977) Introduction to soil microbiology, pp. 338-39. , Wiley Eastern Limited, New Delhi; Allen, O.N., (1957) Experiments in soil bacteriology, pp. 83-6. , Burgess Publishing Co., Minneapolis; Altschul, S.F., Madden, T.L., Schaffer, A.A., Z	Barua, S.; Department of Agricultural Chemistry and Soil Science, Institute of Agricultural Science, University of Calcutta, 35 Ballygunge Circular Road, Kolkata 700019, India; email: shilajit_26@yahoo.co.in								9445013		MCRSE	10.1016/j.micres.2011.04.001	21596539	English	Microbiol Res.	Article	Scopus	soil fertility, nitrogen
Mahanta K., Jha D.K., Rajkhowa D.J., Manoj-Kumar	Microbial enrichment of vermicompost prepared from different plant biomasses and their effect on rice (Oryza sativa L.) growth and soil fertility	2012	Biological Agriculture and Horticulture	28	4		241	250			http://www.scopus.com/inward/record.url?eid=2-s2.0-84876389787&partnerID=40&md5=284a0f1d6eeb81319e5c3a6194444592	Microbiology and Ecology Laboratory, Department of Botany, Gauhati University, Guwahati, 781 014, Assam, India; Division of Natural Resource Management, ICAR Research Complex for NEH Region, Umiam, 793 103, Meghalaya, India; AICRP on Integrated Farming Sy	Mahanta, K., Microbiology and Ecology Laboratory, Department of Botany, Gauhati University, Guwahati, 781 014, Assam, India, AICRP on Integrated Farming System, Assam Agricultural University, Jorhat, 785 013, India; Jha, D.K., Microbiology and Ecology Lab	Vermicomposts prepared from rice straw, Eichhornia crassipes, Ipomoea carnea, and their mixed biomass, were enriched with microbial inoculants and evaluated for their effect on growth and yield of rice, and nutrient availability and microbial population i	bio-waste recycling; enriched vermicompost; microbial population; nutrient availability	biomass; chlorophyll; compost; crop yield; growth rate; inoculation; microbial activity; nutrient availability; organic compound; population structure; recycling; rice; soil fertility; soil microorganism; soil nutrient; waste; India; Azospirillum brasilen						Albanell, E., Plaixats, J., Cabrero, T., Chemical changes during vermicomposting (Eisenia foetida) of sheep manure mixed with cotton industrial waste (1988) Biol Fert Soil, 6, pp. 98-104; Elvira, C., Goicoechea, M., Sampedro, L., Mato, S., Nogales, R., Bi	Manoj-Kumar; Division of Natural Resource Management, ICAR Research Complex for NEH Region, Umiam, 793 103, Meghalaya, India; email: mkumar_iari@yahoo.co.in								1448765			10.1080/01448765.2012.738556		English	Biol. Agric. Hortic.	Article	Scopus	soil fertility, soil structure
Dwivedi B.S., Singh V.K., Shukla A.K., Meena M.C.	Optimizing dry and wet tillage for rice on a Gangetic alluvial soil: Effect on soil characteristics, water use efficiency and productivity of the rice-wheat system	2012	European Journal of Agronomy	43			155	165			http://www.scopus.com/inward/record.url?eid=2-s2.0-84863757304&partnerID=40&md5=9469d370153ffc4f06e1e936b1b5bc1d	Division of Soil Science and Agricultural Chemistry, Indian Agricultural Research Institute, New Delhi 110 012, India; Project Directorate for Farming Systems Research, Modipuram, Meerut 250 110, India; Indian Institute of Soil Science, Nabibagh, Berasia	Dwivedi, B.S., Indian Institute of Soil Science, Nabibagh, Berasia Road, Bhopal 462 038, India; Singh, V.K., Division of Soil Science and Agricultural Chemistry, Indian Agricultural Research Institute, New Delhi 110 012, India; Shukla, A.K., Project Direc	The effect of puddling in reducing water and nitrogen losses, and increasing rice (Oryza sativa L.) yields and N uptake depends on its intensity and also on the level of pre-puddling tillage, although an increase in the intensity of these operations invol	Bulk density; Nitrate-N; Pre-puddling tillage; Puddling; Rice-wheat; Root mass density	alluvial plain; bulk density; concentration (composition); crop production; crop yield; economic analysis; irrigation; nutrient dynamics; optimization; rice; sandy loam; soil profile; tillage; water use efficiency; wheat; yield response; Gangetic Plain; O						Aggarwal, G.C., Sidhu, A.S., Sekhon, N.K., Sandhu, K.S., Sur, H.S., Puddling and N management effects on crop response in a rice-wheat cropping system (1995) Soil and Tillage Research, 36, pp. 129-139; Arora, V.K., Gajri, P.R., Uppal, H.S., Puddling, irri	Dwivedi, B.S.; Division of Soil Science and Agricultural Chemistry, Indian Agricultural Research Institute, New Delhi 110 012, India; email: bsdwivedi@yahoo.com								11610301		EJAGE	10.1016/j.eja.2012.06.002		English	Eur. J. Agron.	Article	Scopus	Soil structure
Hasan Md.M., Shafiquzzaman Md., Nakajima J., Bari Q.H.	Application of a simple arsenic removal filter in a rural area of Bangladesh	2012	Water Science and Technology: Water Supply	12	5		658	665			http://www.scopus.com/inward/record.url?eid=2-s2.0-84867886007&partnerID=40&md5=548e1e9e198b038e01a655a5bac41fdb	Department of Environmental Systems Engineering, Ritsumeikan University, 1-1-1 Nojihigashi, Kusatsu, Shiga 525-8577, Japan; Department of Civil Engineering, Khulna University of Engineering and Technology (KUET), Khulna, Bangladesh	Hasan, Md.M., Department of Environmental Systems Engineering, Ritsumeikan University, 1-1-1 Nojihigashi, Kusatsu, Shiga 525-8577, Japan; Shafiquzzaman, Md., Department of Environmental Systems Engineering, Ritsumeikan University, 1-1-1 Nojihigashi, Kusat	A simple and low-cost household-based arsenic (As) removal filter (ARF) was tested under actual field conditions in a rural area of Bangladesh. The ARF consisted of a ceramic filter made of clay soil and rice bran collected on-site, iron netting and iron	Arsenic removal filter; Groundwater contamination; Iron oxidation; Rural area of Bangladesh; Simple treatment	Arsenic removal; Bangladesh; Groundwater contamination; Iron oxidation; Simple treatment; Adsorption; Arsenic; Groundwater; Iron; Pollution control; Soils; Rural areas; arsenic; arsenic derivative; ground water; iron; phosphorus; well water; adsorption; a		arsenic, 7440-38-2; iron, 14093-02-8, 53858-86-9, 7439-89-6; phosphorus, 7723-14-0				Azam, M.S., Shafiquzzaman, M., Mishima, I., Nakjima, J., Measurement of soluble arsenic in soil of Bangladesh by acidalkali sequential extraction (2009) J. Sci. Res., 1 (1), pp. 92-107; Azam, M.S., Shafiquzzaman, M., Mishima, I., Nakjima, J., Arsenic rele	Hasan, Md.M.; Department of Environmental Systems Engineering, Ritsumeikan University, 1-1-1 Nojihigashi, Kusatsu, Shiga 525-8577, Japan; email: mhshimal96@yahoo.com								16069749		WSTWB	10.2166/ws.2012.039		English	Water Sci. Technol. Water Supply	Article	Scopus	Soil structure
Singh R.D., Shivani, Khan A.R., Chandra N.	Sustainable productivity and profitability of diversified rice-based cropping systems in an irrigated ecosystem	2012	Archives of Agronomy and Soil Science	58	8		859	869			http://www.scopus.com/inward/record.url?eid=2-s2.0-84864609285&partnerID=40&md5=1c619b7f833f512684492a221fec11fe	Crop Research Division, ICAR Research Complex for Eastern Region, Patna, India	Singh, R.D., Crop Research Division, ICAR Research Complex for Eastern Region, Patna, India; Shivani, Crop Research Division, ICAR Research Complex for Eastern Region, Patna, India; Khan, A.R., Crop Research Division, ICAR Research Complex for Eastern Reg	An experiment was conducted at ICAR Research Complex for Eastern Region, Research Farm, Sabajpura, Patna (longitude 85°13′N and 1atitude 25°37′E), Bihar, India for four consecutive years 2004-05 to 2007-08 to develop a diversified cropping system for an i	CDI; crop yields; crops; system productivity	Allium cepa; Coriandrum sativum; Daucus carota; Lagenaria siceraria; Lycopersicon esculentum; Solanum tuberosum						Acharya, S.S., Crop diversification in indian agriculture (2003) Agr Situation India (Special Issue), pp. 239-250. , August; Fertilizer and agriculture statistics, eastern region (2001), Fertilizer Association of India New Dehli (India): Fertilizer Associ	Khan, A. R.; Crop Research Division, ICAR Research Complex for Eastern Region, Patna, India; email: khan_ar@sify.com								3650340			10.1080/03650340.2011.554403		English	Arch. Agron. Soil Sci.	Article	Scopus	Sustainable, ecosystems
Zaman A., Patra S.K.	Water management technologies to increase crop and income per drop with reference to effective utilization of low land eco-system in eastern region	2012	Water and Energy International	69	8		39	45			http://www.scopus.com/inward/record.url?eid=2-s2.0-84871425269&partnerID=40&md5=b8dfaac9f5006ac662c375a425d5d313	Bidhan Chandra Krishi Viswavidyalaya, Kalyani, India	Zaman, A., Bidhan Chandra Krishi Viswavidyalaya, Kalyani, India; Patra, S.K., Bidhan Chandra Krishi Viswavidyalaya, Kalyani, India	India has got 17.2 million ha of low-lying area out of 38.0 million ha through out world and 75% of low land rice area is situated in eastern India, Bangladesh, Myanmar and Thailand. West Bengal, alone has 4.0 lakh ha of current fallow including the area		cost-benefit analysis; crop production; crop yield; cultivation; flash flood; income distribution; irrigation system; participatory approach; rice; water availability; water management; water resource; Bangladesh; India; Myanmar; Thailand; Animalia						Moormann, F.R., van Breman, N., (1978) Rice: Soil, water, Land, , International Rice Research institute, Manila, Philippines; Murthy, R.S., Hirekerum, L.R., Deshpande, S.B., Venkata Rao, B.V., Shankarnarayana, H.S., (1982) Benchmark soils of India, , NBSS	Zaman, A.; Bidhan Chandra Krishi Viswavidyalaya, Kalyani, India								0972057X					English	Water Energy Int.	Article	Scopus	Water, irrigation cost, water management
[truncated: 724 more rows]
